# Supplementary material for: Single and Joined Behaviour of Circulating Biomarkers and Metabolic Parameters in High-Fit and Low-Fit Healthy Females
Source: MDPI journal article supplement (doi:10.3390/ijms24044202), 2023-02-20
Supplement: s1 [file s1]

Supplementary Table S8: Highly correlated biomarkers

|                       |                    |         |         |         |         |         |         |         |         |            |            |          |         |         |         |         |          |       |  |  |  |  |  |  |  |  |  |
|-----------------------|--------------------|---------|---------|---------|---------|---------|---------|---------|---------|------------|------------|----------|---------|---------|---------|---------|----------|-------|--|--|--|--|--|--|--|--|--|
| Biomarker             | TNF.a              |         | MCP.1   |         |         |         |         |         |         |            |            |          |         |         |         |         |          |       |  |  |  |  |  |  |  |  |  |
|                       | TNfa               |         | MCP1    |         |         |         |         |         |         |            |            |          |         |         |         |         |          |       |  |  |  |  |  |  |  |  |  |
|                       |                    | 1.0E-11 |         | 1.0E-11 |         |         |         |         |         |            |            |          |         |         |         |         |          |       |  |  |  |  |  |  |  |  |  |
| Biomarker             | CRP                |         | Glycine |         |         |         |         |         |         |            |            |          |         |         |         |         |          |       |  |  |  |  |  |  |  |  |  |
|                       | CRP                |         | Glycine |         |         |         |         |         |         |            |            |          |         |         |         |         |          |       |  |  |  |  |  |  |  |  |  |
|                       |                    | 2.2E-10 |         | 2.2E-10 |         |         |         |         |         |            |            |          |         |         |         |         |          |       |  |  |  |  |  |  |  |  |  |
| Biomarker             | Isoleucine         |         | Leucine |         | Valine  |         |         |         |         |            |            |          |         |         |         |         |          |       |  |  |  |  |  |  |  |  |  |
|                       | Isoleucine         |         | 8.9E-16 |         | 8.8E-12 |         |         |         |         |            |            |          |         |         |         |         |          |       |  |  |  |  |  |  |  |  |  |
|                       | Leucine            | 8.9E-16 |         |         | <1E-16  |         |         |         |         |            |            |          |         |         |         |         |          |       |  |  |  |  |  |  |  |  |  |
|                       | Valine             | 8.8E-12 | <1E-16  |         |         |         |         |         |         |            |            |          |         |         |         |         |          |       |  |  |  |  |  |  |  |  |  |
| Biomarker             | I                  | II      | III     | IV      | V       | VI      | VII     | VIII    |         |            |            |          |         |         |         |         |          |       |  |  |  |  |  |  |  |  |  |
|                       | SFA (I)            | <1E-16  | <1E-16  | 2.6E-09 |         |         |         |         |         |            |            |          |         |         |         |         |          |       |  |  |  |  |  |  |  |  |  |
|                       | Total.FA (II)      |         | 3.8E-11 | 3.8E-11 |         | 6.7E-09 | 2.5E-09 | 4.4E-09 |         |            |            |          |         |         |         |         |          |       |  |  |  |  |  |  |  |  |  |
|                       | Omega3.FA (III)    | 2.6E-09 |         |         | 1.5E-11 | 4.6E-14 | 6.2E-13 | 1.0E-11 |         |            |            |          |         |         |         |         |          |       |  |  |  |  |  |  |  |  |  |
|                       | Linoleic.acid (IV) |         |         | 1.5E-11 |         | <1E-16  | <1E-16  | 1.4E-12 |         |            |            |          |         |         |         |         |          |       |  |  |  |  |  |  |  |  |  |
|                       | MUFA (V)           |         | 6.7E-09 | 4.6E-14 | <1E-16  | <1E-16  | <1E-16  | 2.3E-13 |         |            |            |          |         |         |         |         |          |       |  |  |  |  |  |  |  |  |  |
|                       | Oleic.acid (VI)    |         | 2.5E-09 | 6.2E-13 | <1E-16  | <1E-16  |         | 4.9E-15 | 3.9E-09 |            |            |          |         |         |         |         |          |       |  |  |  |  |  |  |  |  |  |
|                       | PUFA (VII)         |         | 4.4E-09 | 1.0E-11 | 1.4E-12 | 2.3E-13 | 4.9E-15 |         | <1E-16  |            |            |          |         |         |         |         |          |       |  |  |  |  |  |  |  |  |  |
|                       | ARA...EPA (VIII)   |         |         |         |         | 3.9E-09 | <1E-16  | <1E-16  |         |            |            |          |         |         |         |         |          |       |  |  |  |  |  |  |  |  |  |
|                       | Biomarker          | i       | ii      | iii     |         |         |         |         |         |            |            |          |         |         |         |         |          |       |  |  |  |  |  |  |  |  |  |
| 3-Hydroxybutyrate (i) |                    |         | <1E-16  | 1.5E-08 |         |         |         |         |         |            |            |          |         |         |         |         |          |       |  |  |  |  |  |  |  |  |  |
| Acetoacetate (ii)     |                    | <1E-16  |         | 3.9E-10 |         |         |         |         |         |            |            |          |         |         |         |         |          |       |  |  |  |  |  |  |  |  |  |
|                       |                    | 1.5E-08 | 3.9E-10 |         |         |         |         |         |         |            |            |          |         |         |         |         |          |       |  |  |  |  |  |  |  |  |  |
| Biomarker             | C0                 | C3.0    | C4.0.2M | C5.0    | C5.OH   | C5.1    |         |         |         |            |            |          |         |         |         |         |          |       |  |  |  |  |  |  |  |  |  |
|                       | C0                 |         | 1.2E-11 |         |         |         |         |         |         |            |            |          |         |         |         |         |          |       |  |  |  |  |  |  |  |  |  |
|                       | C3.0               | 1.2E-11 |         | 5.2E-09 | 5.2E-09 | 1.3E-09 |         |         |         |            |            |          |         |         |         |         |          |       |  |  |  |  |  |  |  |  |  |
|                       | C4.0.2M            |         | 5.2E-09 |         | <1E-16  | 7.8E-10 |         |         |         |            |            |          |         |         |         |         |          |       |  |  |  |  |  |  |  |  |  |
|                       | C5.0               |         | 5.2E-09 |         | <1E-16  | 7.8E-10 |         |         |         |            |            |          |         |         |         |         |          |       |  |  |  |  |  |  |  |  |  |
|                       | C5.OH              |         |         | 7.8E-10 | 7.8E-10 |         | 3.3E-12 |         |         |            |            |          |         |         |         |         |          |       |  |  |  |  |  |  |  |  |  |
|                       |                    |         |         |         | 3.3E-12 |         |         |         |         |            |            |          |         |         |         |         |          |       |  |  |  |  |  |  |  |  |  |
| Biomarker             | C6.0               | C8.0    | C10.0   | C10.1   | C14.2   | C14.1   | C14.0   | C12.0   | C12.1   | C12.0.OH.a | C12.0.OH.b | C14.0.OH | C16.1   | C16.0   | C18.1   | C18.2   | C16.0.OH | C18.0 |  |  |  |  |  |  |  |  |  |
|                       | C6.0               | 4.2E-12 | 7.1E-11 |         |         | 6.7E-09 |         |         |         |            |            |          |         |         |         |         |          |       |  |  |  |  |  |  |  |  |  |
|                       | C8.0               | 4.2E-12 |         | 7.1E-11 | 2.6E-14 | 7.9E-11 | 4.4E-15 | 1.3E-09 | <1E-16  | 8.7E-12    |            |          |         |         |         |         |          |       |  |  |  |  |  |  |  |  |  |
|                       | C10.0              | 7.1E-11 | <1E-16  | 1.2E-14 | 3.3E-12 | <1E-16  | 1.4E-10 | <1E-16  | 1.0E-14 |            | 8.9E-09    |          |         | 7.3E-09 |         |         |          |       |  |  |  |  |  |  |  |  |  |
|                       | C10.1              |         | 1.2E-14 |         |         | 2.0E-12 | 2.9E-09 | 1.5E-14 | 1.8E-14 | 7.9E-13    |            | 6.5E-09  |         |         |         |         |          |       |  |  |  |  |  |  |  |  |  |
|                       | C14.2              |         | 7.9E-11 | 3.3E-12 | <1E-16  |         | <1E-16  | 8.5E-12 | <1E-16  | 1.6E-14    |            |          | 4.6E-09 |         |         |         |          |       |  |  |  |  |  |  |  |  |  |
|                       | C14.1              |         | 4.4E-15 | <1E-16  | 2.0E-12 | <1E-16  |         | <1E-16  | 4.2E-10 | 1.8E-11    | 3.3E-10    | <1E-16   |         |         |         | 4.1E-09 |          |       |  |  |  |  |  |  |  |  |  |
|                       | C14.0              |         | 1.3E-09 | 1.4E-10 | 2.9E-09 | 8.5E-12 | <1E-16  |         | <1E-16  | 1.0E-14    |            |          | <1E-16  | 1.4E-11 |         |         |          |       |  |  |  |  |  |  |  |  |  |
|                       | C12.0              |         | <1E-16  | <1E-16  | 1.5E-14 | <1E-16  | <1E-16  | <1E-16  |         | 1.4E-12    | 1.1E-10    |          |         | 2.7E-13 |         |         |          |       |  |  |  |  |  |  |  |  |  |
|                       | C12.1              |         | 8.7E-12 | 1.0E-14 | 1.8E-14 | <1E-16  | <1E-16  | 1.0E-14 | <1E-16  | 4.0E-15    | 1.1E-15    | 8.4E-11  | 7.5E-14 |         |         |         |          |       |  |  |  |  |  |  |  |  |  |
|                       | C12.0.OH.a         |         |         | 8.9E-09 | 7.9E-13 | 1.6E-14 | 4.2E-10 | 1.4E-12 | 4.0E-15 |            | 2.4E-10    | 4.8E-11  |         |         |         |         |          |       |  |  |  |  |  |  |  |  |  |
|                       | C12.0.OH.b         |         |         |         | 6.5E-09 |         | 1.8E-11 | 1.1E-15 | 2.4E-10 |            | 1.7E-14    | 2.1E-10  |         |         |         | 2.1E-09 |          |       |  |  |  |  |  |  |  |  |  |
|                       | C14.0.OH           |         |         |         |         | 3.3E-10 | 4.2E-10 | 1.1E-15 | 8.4E-11 | 4.8E-11    | 1.7E-14    |          |         |         |         | 7.7E-09 |          |       |  |  |  |  |  |  |  |  |  |
|                       | C16.1              |         |         |         |         | <1E-16  | <1E-16  | 2.7E-13 | 7.5E-14 |            | 2.1E-10    |          |         |         | 6.2E-10 | 1.4E-12 |          |       |  |  |  |  |  |  |  |  |  |
|                       | C18.2              |         |         |         |         |         |         |         |         |            |            |          |         |         |         | 2.8E-10 |          |       |  |  |  |  |  |  |  |  |  |
|                       | C18.1              |         |         |         |         |         |         |         |         |            |            |          |         |         |         |         | 2.8E-10  |       |  |  |  |  |  |  |  |  |  |
|                       | C16.0              |         |         |         |         |         |         |         |         |            |            |          |         |         |         |         |          |       |  |  |  |  |  |  |  |  |  |
|                       | C16.0.OH           |         |         |         |         |         |         |         |         |            |            |          |         |         |         |         |          |       |  |  |  |  |  |  |  |  |  |
|                       | C18.0              |         |         |         |         |         |         |         |         |            |            |          |         |         |         |         |          |       |  |  |  |  |  |  |  |  |  |
|                       |                    |         |         |         |         |         |         |         |         |            |            |          |         |         |         |         |          |       |  |  |  |  |  |  |  |  |  |
|                       |                    |         |         |         |         |         |         |         |         |            |            |          |         |         |         |         |          |       |  |  |  |  |  |  |  |  |  |
|                       |                    |         |         |         |         |         |         |         |         |            |            |          |         |         |         |         |          |       |  |  |  |  |  |  |  |  |  |
|                       |                    |         |         |         |         |         |         |         |         |            |            |          |         |         |         |         |          |       |  |  |  |  |  |  |  |  |  |
|                       |                    |         |         |         |         |         |         |         |         |            |            |          |         |         |         |         |          |       |  |  |  |  |  |  |  |  |  |
|                       |                    |         |         |         |         |         |         |         |         |            |            |          |         |         |         |         |          |       |  |  |  |  |  |  |  |  |  |
|                       |                    |         |         |         |         |         |         |         |         |            |            |          |         |         |         |         |          |       |  |  |  |  |  |  |  |  |  |
|                       |                    |         |         |         |         |         |         |         |         |            |            |          |         |         |         |         |          |       |  |  |  |  |  |  |  |  |  |
|                       |                    |         |         |         |         |         |         |         |         |            |            |          |         |         |         |         |          |       |  |  |  |  |  |  |  |  |  |
|                       |                    |         |         |         |         |         |         |         |         |            |            |          |         |         |         |         |          |       |  |  |  |  |  |  |  |  |  |
|                       |                    |         |         |         |         |         |         |         |         |            |            |          |         |         |         |         |          |       |  |  |  |  |  |  |  |  |  |
|                       |                    |         |         |         |         |         |         |         |         |            |            |          |         |         |         |         |          |       |  |  |  |  |  |  |  |  |  |
|                       |                    |         |         |         |         |         |         |         |         |            |            |          |         |         |         |         |          |       |  |  |  |  |  |  |  |  |  |
|                       |                    |         |         |         |         |         |         |         |         |            |            |          |         |         |         |         |          |       |  |  |  |  |  |  |  |  |  |
|                       |                    |         |         |         |         |         |         |         |         |            |            |          |         |         |         |         |          |       |  |  |  |  |  |  |  |  |  |
|                       |                    |         |         |         |         |         |         |         |         |            |            |          |         |         |         |         |          |       |  |  |  |  |  |  |  |  |  |
|                       |                    |         |         |         |         |         |         |         |         |            |            |          |         |         |         |         |          |       |  |  |  |  |  |  |  |  |  |
|                       |                    |         |         |         |         |         |         |         |         |            |            |          |         |         |         |         |          |       |  |  |  |  |  |  |  |  |  |
|                       |                    |         |         |         |         |         |         |         |         |            |            |          |         |         |         |         |          |       |  |  |  |  |  |  |  |  |  |
|                       |                    |         |         |         |         |         |         |         |         |            |            |          |         |         |         |         |          |       |  |  |  |  |  |  |  |  |  |
|                       |                    |         |         |         |         |         |         |         |         |            |            |          |         |         |         |         |          |       |  |  |  |  |  |  |  |  |  |
|                       |                    |         |         |         |         |         |         |         |         |            |            |          |         |         |         |         |          |       |  |  |  |  |  |  |  |  |  |
|                       |                    |         |         |         |         |         |         |         |         |            |            |          |         |         |         |         |          |       |  |  |  |  |  |  |  |  |  |
|                       |                    |         |         |         |         |         |         |         |         |            |            |          |         |         |         |         |          |       |  |  |  |  |  |  |  |  |  |
|                       |                    |         |         |         |         |         |         |         |         |            |            |          |         |         |         |         |          |       |  |  |  |  |  |  |  |  |  |
|                       |                    |         |         |         |         |         |         |         |         |            |            |          |         |         |         |         |          |       |  |  |  |  |  |  |  |  |  |
|                       |                    |         |         |         |         |         |         |         |         |            |            |          |         |         |         |         |          |       |  |  |  |  |  |  |  |  |  |
|                       |                    |         |         |         |         |         |         |         |         |            |            |          |         |         |         |         |          |       |  |  |  |  |  |  |  |  |  |
|                       |                    |         |         |         |         |         |         |         |         |            |            |          |         |         |         |         |          |       |  |  |  |  |  |  |  |  |  |
|                       |                    |         |         |         |         |         |         |         |         |            |            |          |         |         |         |         |          |       |  |  |  |  |  |  |  |  |  |
|                       |                    |         |         |         |         |         |         |         |         |            |            |          |         |         |         |         |          |       |  |  |  |  |  |  |  |  |  |
|                       |                    |         |         |         |         |         |         |         |         |            |            |          |         |         |         |         |          |       |  |  |  |  |  |  |  |  |  |
|                       |                    |         |         |         |         |         |         |         |         |            |            |          |         |         |         |         |          |       |  |  |  |  |  |  |  |  |  |
|                       |                    |         |         |         |         |         |         |         |         |            |            |          |         |         |         |         |          |       |  |  |  |  |  |  |  |  |  |
