# Supplementary material for: Single and Joined Behaviour of Circulating Biomarkers and Metabolic Parameters in High-Fit and Low-Fit Healthy Females
Source: MDPI journal article supplement (doi:10.3390/ijms24044202), 2023-02-20
Supplement: s1 [file s1]

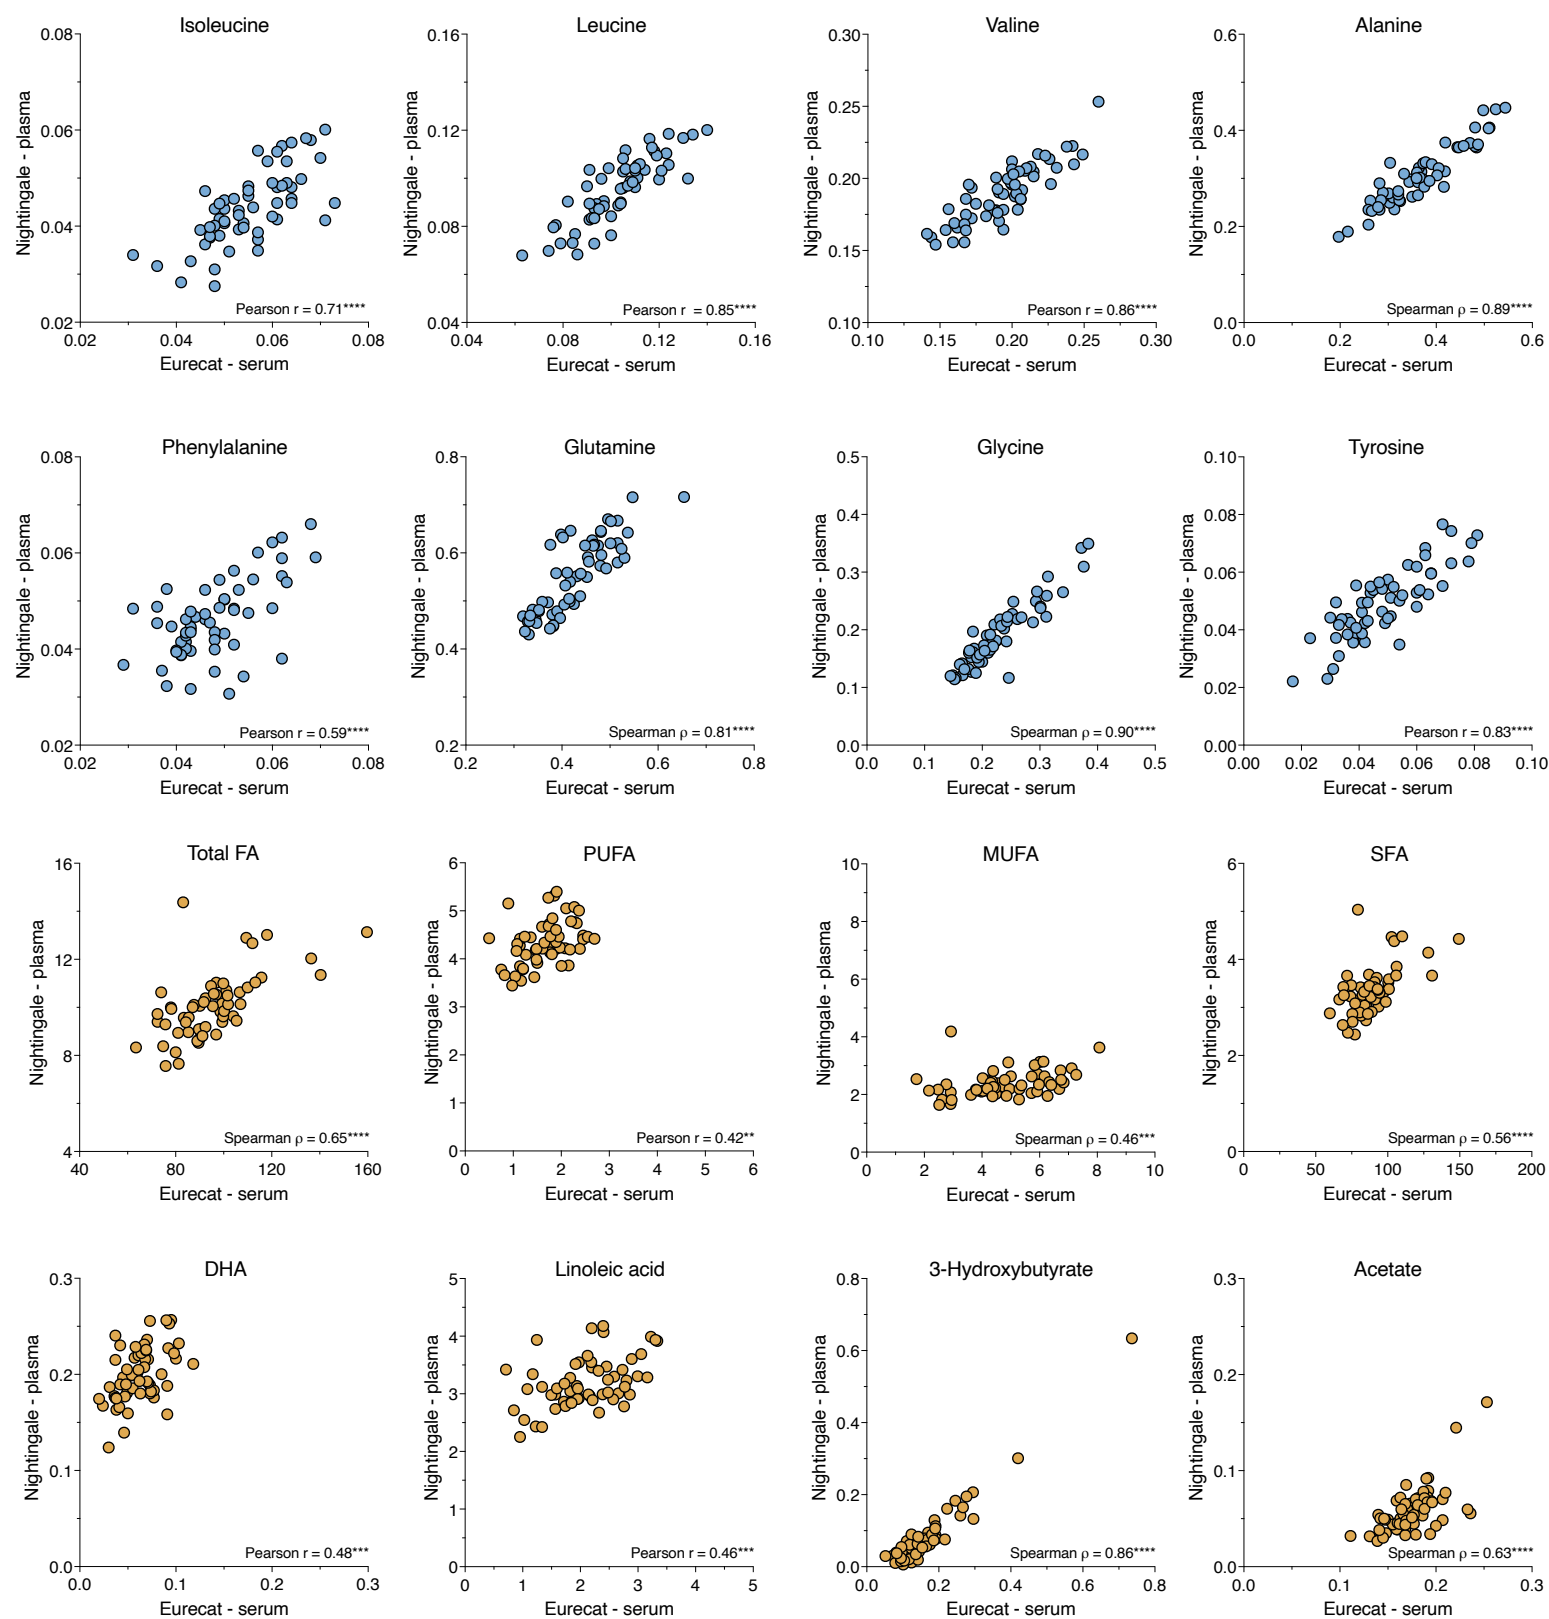

**Supplementary Figure S1: Correlations between biomarkers and metabolic parameters in serum and plasma with two platforms. (A - P)** Correlations of amino acid derivatives (A - H, blue) or fatty acids (I - P, beige) analyzed in serum at Eurecat (x-axis) or in plasma at Nightingale (y-axis). All concentrations are in mmol/L. Pearson correlation coefficients ( $r$ ) were calculated normally distributed variables and Spearman rank correlation coefficients ( $\rho$ ) were calculated for not-normally distributed variables. \*\*\*\*  $P < 0.0001$ , \*\*\*  $P < 0.001$ , \*\*  $P < 0.01$ .
