# Supplementary material for: Single and Joined Behaviour of Circulating Biomarkers and Metabolic Parameters in High-Fit and Low-Fit Healthy Females
Source: MDPI journal article supplement (doi:10.3390/ijms24044202), 2023-02-20
Supplement: s1 [file s1]

Supplementary Table S1: Peptide hormone markers

| Biomarker <sup>a</sup> | Matrix | Method | Concentration | Low-fit<br>(Baseline) | Low-fit<br>(Post-exercise) | High-fit<br>(Baseline) | High-fit<br>(Post-exercise) | Transformation <sup>#</sup> | Fitness level effect   |                        |                        | Recent exercise effect    |                           |                        | Interaction effect                   |                                      |                        |
|------------------------|--------|--------|---------------|-----------------------|----------------------------|------------------------|-----------------------------|-----------------------------|------------------------|------------------------|------------------------|---------------------------|---------------------------|------------------------|--------------------------------------|--------------------------------------|------------------------|
|                        |        |        |               |                       |                            |                        |                             |                             | P <sub>group raw</sub> | P <sub>group adj</sub> | Partial η <sup>2</sup> | P <sub>exercise raw</sub> | P <sub>exercise adj</sub> | Partial η <sup>2</sup> | P <sub>group*<br/>exercise raw</sub> | P <sub>group*<br/>exercise adj</sub> | Partial η <sup>2</sup> |
| Leptin                 | Serum  | ELISA  | ng/mL         | 12.8 [7.1 – 18.1]     | 16.8 [8.8 – 24.5]          | 5.6 [3.9 – 6.6]        | 4.4 [3.7 – 5.6]             | Log                         | <b>0.001</b>           | <b><u>0.076</u></b>    | 0.339                  | 0.391                     | 0.570                     | 0.026                  | 0.067                                | 0.346                                | 0.114                  |
| Insulin                | Serum  | ELISA  | mU/L          | 4.1 [3.4 – 5.0]       | 3.9 [2.8 – 4.8]            | 3.3 [2.6 – 4.3]        | 2.5 [2.2 – 3.7]             | Log                         | <b>0.039</b>           | 0.464                  | 0.144                  | <b>0.037</b>              | 0.105                     | 0.148                  | 0.439                                | 0.656                                | 0.022                  |
| Adiponectin            | Serum  | ELISA  | µg/mL         | 24.0 [16.0 – 29.6]    | 28.6 [21.3 – 33.6]         | 19.4 [13.9 – 27.4]     | 32.9 [27.2 – 38.9]          | Log                         | 0.914                  | 0.931                  | 4.29E-04               | <b>1.55E-04</b>           | <b><u>0.001</u></b>       | 0.405                  | 0.143                                | 0.409                                | 0.075                  |

Data is represented as mean [IQR]. Normally distributed data is represented as mean (SD) and non-normally distributed data is represented as mean [IQR]. Raw P-values were adjusted using an FDR of 10%. Significant raw P-values are indicated in **bold**. Significant FDR-adjusted P-values (< 0.10) are indicated in **underlined bold**.

<sup>#</sup>Log-transformation was applied on not-normally distributed variables.

<sup>a</sup>Analyzed using the EURECAT platform.

Supplementary Table S2: Inflammation and oxidative stress related markers

| Biomarker <sup>a</sup> | Matrix | Method | Concentration | Low-fit<br>(Baseline) | Low-fit<br>(Post-exercise) | High-fit<br>(Baseline) | High-fit<br>(Post-exercise) | Transformation <sup>#</sup> | Fitness level effect   |                        |                        | Recent exercise effect    |                           |                        | Interaction effect                   |                                      |                        |
|------------------------|--------|--------|---------------|-----------------------|----------------------------|------------------------|-----------------------------|-----------------------------|------------------------|------------------------|------------------------|---------------------------|---------------------------|------------------------|--------------------------------------|--------------------------------------|------------------------|
|                        |        |        |               |                       |                            |                        |                             |                             | P <sub>group raw</sub> | P <sub>group adj</sub> | Partial η <sup>2</sup> | P <sub>exercise raw</sub> | P <sub>exercise adj</sub> | Partial η <sup>2</sup> | P <sub>group*<br/>exercise raw</sub> | P <sub>group*<br/>exercise adj</sub> | Partial η <sup>2</sup> |
| TNF                    | Plasma | ELISA  | pg/mL         | 0.44 [0.38 – 0.58]    | 0.39 [0.36 – 0.43]         | 0.60 [0.49 – 0.78]     | 0.34 [0.28 – 0.39]          | Log                         | 0.693                  | 0.897                  | 0.006                  | <b>1.20E-05</b>           | <b><u>3.09E-04</u></b>    | 0.502                  | <b>0.009</b>                         | 0.247                                | 0.220                  |
| IL6                    | Plasma | ELISA  | pg/mL         | 1.02 [0.64 – 1.29]    | 0.66 [0.41 – 1.16]         | 0.76 [0.55 – 1.41]     | 0.43 [0.26 – 0.58]          | Log                         | 0.154                  | 0.640                  | 0.071                  | <b>0.004</b>              | <b><u>0.017</u></b>       | 0.256                  | <b>0.036</b>                         | 0.325                                | 0.147                  |
| IL10                   | Plasma | ELISA  | pg/mL         | 0.57 [0.31 – 8.61]    | 0.33 [0.09 – 0.60]         | 7.93 [4.82 – 11.2]     | 0.43 [0.21 – 0.70]          | Log                         | <b>0.025</b>           | 0.464                  | 0.167                  | <b>3.46E-04</b>           | <b><u>0.003</u></b>       | 0.372                  | 0.116                                | 0.372                                | 0.086                  |
| CRP                    | Serum  | ELISA  | µg/mL         | 0.66 [0.51 – 1.78]    | 0.85 [0.63 – 2.27]         | 0.31 [0.14 – 1.91]     | 0.43 [0.22 – 2.17]          | Log                         | 0.065                  | 0.606                  | 0.117                  | <b>3.31E-04</b>           | <b><u>0.003</u></b>       | 0.374                  | 0.250                                | 0.547                                | 0.047                  |
| Soluble CD14           | Plasma | ELISA  | µg/mL         | 1.26 [1.15 – 1.43]    | 1.38 [1.23 – 1.46]         | 1.33 [1.15 – 1.43]     | 1.56 [1.26 – 1.68]          | Log                         | 0.546                  | 0.897                  | 0.013                  | <b>0.004</b>              | <b><u>0.015</u></b>       | 0.265                  | 0.082                                | 0.352                                | 0.104                  |
| MCP1                   | Plasma | ELISA  | pg/mL         | 166 [144 – 267]       | 131 [111 – 144]            | 244 [212 – 280]        | 100 [89.1 – 111]            | Inverse                     | 0.379                  | 0.855                  | 0.028                  | <b>1.21E-07</b>           | <b><u>4.16E-06</u></b>    | 0.638                  | <b>0.005</b>                         | 0.247                                | 0.247                  |
| Soluble ICAM1          | Plasma | ELISA  | ng/mL         | 161 [117 – 184]       | 151 [129 – 189]            | 169 [165 – 182]        | 189 [129 – 197]             | Square                      | 0.160                  | 0.640                  | 0.069                  | 0.939                     | 0.972                     | 2.14x10 <sup>-4</sup>  | 0.709                                | 0.815                                | 0.005                  |
| LBP                    | Plasma | ELISA  | µg/µL         | 6.84 [5.82 – 8.89]    | 6.62 [5.66 – 10.3]         | 6.35 [5.49 – 8.37]     | 6.21 [5.84 – 7.72]          | Log                         | 0.604                  | 0.897                  | 0.010                  | 0.620                     | 0.718                     | 0.009                  | 0.967                                | 0.989                                | 6.20E-05               |
| N-acetyl glycoproteins | Serum  | NMR    | mmol/L        | 0.07 [0.06 – 0.08]    | 0.11 [0.10 – 0.13]         | 0.08 [0.06 – 0.09]     | 0.12 [0.11 – 0.13]          | Log                         | 0.513                  | 0.897                  | 0.015                  | <b>1.02E-07</b>           | <b><u>4.16E-06</u></b>    | 0.642                  | 0.938                                | 0.982                                | 2.24E-04               |
| Oxidized LDL           | Plasma | ELISA  | U/L           | 103 [86 – 151]        | 85 [66 – 120]              | 190 [27 – 389]         | 82 [65 – 123]               | Log                         | 0.679                  | 0.897                  | 0.006                  | 0.315                     | 0.508                     | 0.036                  | 0.581                                | 0.739                                | 0.011                  |

Data is represented as mean [IQR]. Normally distributed data is represented as mean (SD) and non-normally distributed data is represented as mean [IQR]. Raw P-values were adjusted using an FDR of 10%. Significant raw P-values are indicated in **bold**. Significant FDR-adjusted P-values (< 0.10) are indicated in **underlined bold**.

<sup>#</sup>Transformations (log, inverse, square) were applied on not-normally distributed variables.

<sup>a</sup>Analyzed using the EURECAT platform.

# Supplementary Table S3: Metabolic markers

| Metabolism class                                              | Biomarker <sup>a</sup>         | Matrix | Method | Concentration | Low-fit<br>(Baseline)    | Low-fit<br>(Post-<br>exercise) | High-fit<br>(Baseline)   | High-fit<br>(Post-<br>exercise) | Transformation <sup>#</sup> | Fitness level effect      |                           |                           | Recent exercise effect       |                              |                           | Interaction effect                     |                                        |                           |
|---------------------------------------------------------------|--------------------------------|--------|--------|---------------|--------------------------|--------------------------------|--------------------------|---------------------------------|-----------------------------|---------------------------|---------------------------|---------------------------|------------------------------|------------------------------|---------------------------|----------------------------------------|----------------------------------------|---------------------------|
|                                                               |                                |        |        |               |                          |                                |                          |                                 |                             | P <sub>group</sub><br>raw | P <sub>group</sub><br>adj | Partial<br>η <sup>2</sup> | P <sub>exercise</sub><br>raw | P <sub>exercise</sub><br>adj | Partial<br>η <sup>2</sup> | P <sub>group*</sub><br>exercise<br>raw | P <sub>group*</sub><br>exercise<br>adj | Partial<br>η <sup>2</sup> |
| Protein and amino<br>acid related<br>metabolites <sup>a</sup> | Isoleucine                     | Serum  | NMR    | mmol/L        | 0.05 (0.01)              | 0.054<br>(0.010)               | 0.054 (0.006)            | 0.058<br>(0.009)                | -                           | 0.287                     | 0.806                     | 0.042                     | 0.447                        | 0.622                        | 0.022                     | 0.447                                  | 0.657                                  | 0.022                     |
|                                                               | Leucine                        | Serum  | NMR    | mmol/L        | 0.10 (0.01)              | 0.099<br>(0.014)               | 0.097 (0.011)            | 0.109<br>(0.019)                | -                           | 0.081                     | 0.640                     | 0.108                     | 0.298                        | 0.508                        | 0.040                     | 0.812                                  | 0.889                                  | 0.002                     |
|                                                               | Valine                         | Serum  | NMR    | mmol/L        | 0.20 (0.03)              | 0.204<br>(0.028)               | 0.185 (0.017)            | 0.202<br>(0.030)                | -                           | 0.991                     | 0.931                     | 0.000                     | <b>0.002</b>                 | <b>0.009</b>                 | 0.316                     | 0.764                                  | 0.855                                  | 0.003                     |
|                                                               | Alanine                        | Serum  | NMR    | mmol/L        | 0.36 (0.06)              | 0.355<br>(0.057)               | 0.341 (0.073)            | 0.402<br>(0.085)                | -                           | 0.187                     | 0.664                     | 0.064                     | 0.060                        | 0.146                        | 0.125                     | 0.385                                  | 0.615                                  | 0.028                     |
|                                                               | Phenylalanine                  | Serum  | NMR    | mmol/L        | 0.04 (0.01)              | 0.044<br>(0.005)               | 0.047 (0.007)            | 0.051<br>(0.010)                | -                           | 0.129                     | 0.640                     | 0.083                     | 0.927                        | 0.972                        | 3.18E-<br>04              | 0.054                                  | 0.346                                  | 0.131                     |
|                                                               | Glutamine                      | Serum  | NMR    | mmol/L        | 0.42 [0.40 –<br>0.45]    | 0.422 [0.398<br>– 0.454]       | 0.389 [0.348<br>– 0.473] | 0.465 [0.397<br>– 0.516]        | Log                         | 0.406                     | 0.855                     | 0.026                     | <b>0.005</b>                 | <b>0.018</b>                 | 0.257                     | 0.720                                  | 0.815                                  | 0.005                     |
|                                                               | Glutamate                      | Serum  | NMR    | mmol/L        | 0.07 [0.06 –<br>0.08]    | 0.071 [0.064<br>– 0.082]       | 0.080 [0.065<br>– 0.095] | 0.065 [0.060<br>– 0.089]        | Log                         | 0.315                     | 0.812                     | 0.037                     | 0.984                        | 0.972                        | 1.40E-<br>05              | 0.170                                  | 0.443                                  | 0.069                     |
|                                                               | Glycine                        | Serum  | NMR    | mmol/L        | 0.20 [0.18 –<br>0.24]    | 0.204 [0.182<br>– 0.238]       | 0.218 [0.186<br>– 0.229] | 0.233 [0.200<br>– 0.306]        | Log                         | 0.148                     | 0.640                     | 0.076                     | 0.566                        | 0.685                        | 0.012                     | 0.371                                  | 0.615                                  | 0.030                     |
|                                                               | Methionine                     | Serum  | NMR    | mmol/L        | 0.017 (0.007)            | 0.017<br>(0.007)               | 0.021 (0.014)            | 0.032<br>(0.014)                | -                           | <b>0.010</b>              | 0.376                     | 0.221                     | 0.963                        | 0.972                        | 8.10E-<br>05              | 0.188                                  | 0.450                                  | 0.063                     |
|                                                               | Tyrosine                       | Serum  | NMR    | mmol/L        | 0.047 (0.014)            | 0.047<br>(0.014)               | 0.048 (0.014)            | 0.051<br>(0.016)                | -                           | 0.676                     | 0.897                     | 0.007                     | 0.549                        | 0.673                        | 0.013                     | 0.320                                  | 0.615                                  | 0.037                     |
|                                                               | Tryptophan                     | Serum  | NMR    | mmol/L        | 0.057 (0.013)            | 0.057<br>(0.013)               | 0.051 (0.017)            | 0.053<br>(0.019)                | -                           | 0.592                     | 0.897                     | 0.011                     | 0.270                        | 0.472                        | 0.045                     | 0.685                                  | 0.812                                  | 0.006                     |
|                                                               | Betaine                        | Serum  | NMR    | mmol/L        | 0.03 [0.02 –<br>0.04]    | 0.031 [0.022<br>– 0.036]       | 0.027 [0.019<br>– 0.033] | 0.032 [0.022<br>– 0.041]        | Inverse Sqrt                | 0.740                     | 0.897                     | 0.004                     | <b>0.002</b>                 | <b>0.011</b>                 | 0.293                     | 0.477                                  | 0.680                                  | 0.019                     |
| Carbohydrate and<br>TCA cycle<br>metabolites <sup>b</sup>     | Glucose                        | Plasma | NMR    | mmol/L        | 4.80 (0.28)              | 4.78 (0.32)                    | 4.85 (0.22)              | 4.81 (0.10)                     | -                           | 0.620                     | 0.897                     | 0.009                     | 0.363                        | 0.559                        | 0.030                     | 0.710                                  | 0.815                                  | 0.005                     |
|                                                               | Lactate                        | Plasma | NMR    | mmol/L        | 0.72 (0.16)              | 0.71 (0.192)                   | 0.79 (0.17)              | 0.75 (0.23)                     | -                           | 0.382                     | 0.855                     | 0.027                     | 0.589                        | 0.698                        | 0.011                     | 0.809                                  | 0.889                                  | 0.002                     |
|                                                               | Pyruvate                       | Plasma | NMR    | mmol/L        | 0.054 (0.014)            | 0.056<br>(0.009)               | 0.054 (0.010)            | 0.061<br>(0.015)                | -                           | 0.531                     | 0.897                     | 0.014                     | 0.123                        | 0.257                        | 0.083                     | 0.343                                  | 0.615                                  | 0.032                     |
|                                                               | Citrate                        | Plasma | NMR    | mmol/L        | 0.066 (0.009)            | 0.065<br>(0.013)               | 0.067 (0.010)            | 0.073<br>(0.012)                | -                           | 0.204                     | 0.677                     | 0.057                     | 0.238                        | 0.435                        | 0.049                     | 0.143                                  | 0.409                                  | 0.075                     |
| Lipid metabolites –<br>Fatty acids <sup>a, 5</sup>            | Total FA chains                | Serum  | NMR    | mmol/L        | 99 [92 – 105]            | 94 [90 –<br>100]               | 91 [83 – 110]            | 84 [76 – 98]                    | Log                         | 0.310                     | 0.812                     | 0.038                     | <b>0.040</b>                 | 0.111                        | 0.147                     | 0.344                                  | 0.615                                  | 0.033                     |
|                                                               | PUFA                           | Serum  | NMR    | mmol/L        | 1.63 (0.47)              | 2.00 (0.44)                    | 1.58 (0.47)              | 1.57 (0.48)                     | -                           | 0.127                     | 0.640                     | 0.084                     | 0.074                        | 0.169                        | 0.114                     | 0.056                                  | 0.346                                  | 0.129                     |
|                                                               | Omega-3 FA                     | Serum  | NMR    | mmol/L        | 0.167 (0.021)            | 0.179<br>(0.030)               | 0.161 (0.043)            | 0.160<br>(0.037)                | -                           | 0.197                     | 0.677                     | 0.061                     | 0.515                        | 0.655                        | 0.016                     | 0.475                                  | 0.680                                  | 0.019                     |
|                                                               | ARA & EPA                      | Serum  | NMR    | mmol/L        | 0.450 (0.085)            | 0.514<br>(0.086)               | 0.439 (0.101)            | 0.442<br>(0.086)                | -                           | 0.158                     | 0.640                     | 0.072                     | 0.097                        | 0.208                        | 0.099                     | 0.122                                  | 0.380                                  | 0.086                     |
|                                                               | DHA                            | Serum  | NMR    | mmol/L        | 0.074 (0.020)            | 0.065<br>(0.018)               | 0.060 (0.022)            | 0.051<br>(0.019)                | -                           | <b>0.041</b>              | 0.464                     | 0.146                     | <b>0.032</b>                 | <b>0.095</b>                 | 0.159                     | 0.987                                  | 0.989                                  | 1.10x10 <sup>-</sup><br>5 |
|                                                               | Linoleic acid                  | Serum  | NMR    | mmol/L        | 1.88 (0.44)              | 2.57 (0.47)                    | 1.94 (0.63)              | 2.00 (0.74)                     | -                           | 0.165                     | 0.640                     | 0.070                     | <b>0.012</b>                 | <b>0.041</b>                 | 0.213                     | <b>0.031</b>                           | 0.325                                  | 0.162                     |
|                                                               | MUFA                           | Serum  | NMR    | mmol/L        | 4.28 (0.95)              | 5.72 (1.03)                    | 4.52 (1.50)              | 4.62 (1.57)                     | -                           | 0.276                     | 0.806                     | 0.044                     | <b>0.023</b>                 | <b>0.070</b>                 | 0.177                     | <b>0.046</b>                           | 0.336                                  | 0.140                     |
|                                                               | Oleic acid                     | Serum  | NMR    | mmol/L        | 1.63 [1.41 –<br>1.75]    | 2.03 [1.89 –<br>2.32]          | 1.60 [1.27 –<br>1.90]    | 1.74 [1.22 –<br>2.12]           | Log                         | 0.426                     | 0.878                     | 0.024                     | 0.053                        | 0.134                        | 0.132                     | 0.076                                  | 0.352                                  | 0.112                     |
|                                                               | SFA                            | Serum  | NMR    | mmol/L        | 93 [87 – 98]             | 86 [82 – 91]                   | 86 [79 – 103]            | 79 [71 – 91]                    | Log                         | 0.351                     | 0.855                     | 0.032                     | <b>0.012</b>                 | <b>0.041</b>                 | 0.213                     | 0.434                                  | 0.656                                  | 0.023                     |
|                                                               | Phosphoglycerides <sup>b</sup> | Plasma | NMR    | mmol/L        | 2.15 [1.92 –<br>2.32]    | 2.02 [1.84 –<br>2.26]          | 2.15 [1.99 –<br>2.40]    | 2.11 [1.87 –<br>2.22]           | Log                         | 0.814                     | 0.897                     | 0.002                     | <b>2.24E-<br/>04</b>         | <b>0.002</b>                 | 0.390                     | 0.614                                  | 0.772                                  | 0.009                     |
|                                                               | Acetate <sup>b</sup>           | Plasma | NMR    | mmol/L        | 0.046 [0.039<br>– 0.074] | 0.068 [0.052<br>– 0.072]       | 0.050 [0.045<br>– 0.057] | 0.051 [0.043<br>– 0.062]        | Log                         | 0.166                     | 0.640                     | 0.067                     | 0.160                        | 0.318                        | 0.069                     | 0.294                                  | 0.613                                  | 0.039                     |
| Lipid metabolites –<br>Cholines <sup>b</sup>                  | Choline                        | Serum  | NMR    | mmol/L        | 0.047 (0.009)            | 0.055<br>(0.014)               | 0.054 (0.008)            | 0.059<br>(0.016)                | -                           | 0.191                     | 0.664                     | 0.062                     | <b>0.015</b>                 | <b>0.049</b>                 | 0.201                     | 0.560                                  | 0.737                                  | 0.013                     |
|                                                               | Lysophosphatidylcholine        | Serum  | NMR    | mmol/L        | 0.261 (0.030)            | 0.316<br>(0.028)               | 0.240 (0.028)            | 0.317<br>(0.038)                | -                           | 0.257                     | 0.803                     | 0.047                     | <b>3.41E-<br/>08</b>         | <b>3.51E-<br/>06</b>         | 0.682                     | 0.197                                  | 0.461                                  | 0.061                     |

|                                                 |                                           |        |       |        |                       |                       |                       |                       |         |              |        |          |              |              |          |              |        |         |
|-------------------------------------------------|-------------------------------------------|--------|-------|--------|-----------------------|-----------------------|-----------------------|-----------------------|---------|--------------|--------|----------|--------------|--------------|----------|--------------|--------|---------|
| Lipid metabolites – Ketone bodies <sup>b</sup>  | 3-Hydroxybutyrate                         | Plasma | NMR   | mmol/L | 0.064 [0.052 – 0.136] | 0.078 [0.043 – 0.103] | 0.056 [0.028 – 0.076] | 0.061 [0.038 – 0.079] | Log     | 0.142        | 0.640  | 0.075    | 0.159        | 0.318        | 0.070    | 0.388        | 0.615  | 0.027   |
|                                                 | Acetoacetate                              | Plasma | NMR   | mmol/L | 0.032 [0.022 – 0.071] | 0.036 [0.025 – 0.048] | 0.027 [0.017 – 0.035] | 0.030 [0.021 – 0.042] | Log     | 0.143        | 0.640  | 0.075    | 0.241        | 0.435        | 0.049    | 0.540        | 0.722  | 0.014   |
|                                                 | Acetone                                   | Plasma | NMR   | mmol/L | 0.018 [0.015 – 0.022] | 0.018 [0.015 – 0.023] | 0.016 [0.016 – 0.020] | 0.019 [0.015 – 0.023] | Log     | 0.610        | 0.897  | 0.009    | 0.310        | 0.508        | 0.037    | 0.348        | 0.615  | 0.032   |
| Lipid metabolites – Acylcarnitines <sup>a</sup> | Carnitine (C:0)                           | Plasma | LC/MS | μmol/L | 20.7 (4.7)            | 19.9 (4.5)            | 18.7 (5.0)            | 19.3 (4.7)            | -       | 0.466        | 0.897  | 0.019    | 0.878        | 0.946        | 0.001    | <b>0.039</b> | 0.325  | 0.144   |
|                                                 | Acetylcarnitine (C2:0)                    | Plasma | LC/MS | μmol/L | 11.4 (3.0)            | 11.9 (2.5)            | 9.6 (2.4)             | 9.9 (1.9)             | -       | <b>0.030</b> | 0.464  | 0.157    | 0.374        | 0.566        | 0.028    | 0.881        | 0.946  | 0.001   |
|                                                 | Propionylcarnitine (C3:0)                 | Plasma | LC/MS | μmol/L | 0.319 [0.257 – 0.382] | 0.299 [0.249 – 0.382] | 0.302 [0.228 – 0.344] | 0.295 [0.250 – 0.357] | Log     | 0.357        | 0.855  | 0.030    | 0.906        | 0.962        | 0.001    | 0.380        | 0.615  | 0.028   |
|                                                 | Butyrylcarnitine (C4:0)                   | Plasma | LC/MS | μmol/L | 0.159 [0.137 – 0.222] | 0.187 [0.139 – 0.219] | 0.131 [0.114 – 0.166] | 0.123 [0.109 – 0.168] | Log     | <b>0.034</b> | 0.464  | 0.151    | 0.882        | 0.946        | 0.001    | 0.574        | 0.739  | 0.011   |
|                                                 | Isobutyrylcarnitine (C4:0-iso)            | Plasma | LC/MS | μmol/L | 0.093 [0.069 – 0.121] | 0.079 [0.070 – 0.120] | 0.087 [0.060 – 0.171] | 0.099 [0.068 – 0.147] | Log     | 0.640        | 0.897  | 0.008    | 0.713        | 0.807        | 0.005    | 0.854        | 0.926  | 0.001   |
|                                                 | Valerylcarnitine (C5) <sup>i</sup>        | Plasma | LC/MS | μmol/L | 0.076 [0.066 – 0.100] | 0.077 [0.068 – 0.098] | 0.076 [0.059 – 0.088] | 0.073 [0.068 – 0.091] | Log     | 0.366        | 0.855  | 0.028    | 0.427        | 0.613        | 0.024    | 0.180        | 0.443  | 0.064   |
|                                                 | Hydroxyisovalerylcarnitine (C5:0-OH)      | Plasma | LC/MS | μmol/L | 0.034 [0.030 – 0.049] | 0.036 [0.030 – 0.047] | 0.038 [0.032 – 0.043] | 0.040 [0.032 – 0.042] | X       | 0.806*       | 0.897* | NA       | 0.187*       | 0.357*       | NA       | 0.305*       | 0.615* | NA      |
|                                                 | Glutaryl carnitine (C5:0-DC)              | Plasma | LC/MS | μmol/L | 0.069 [0.063 – 0.082] | 0.067 [0.061 – 0.080] | 0.079 [0.071 – 0.087] | 0.081 [0.079 – 0.085] | Log     | 0.140        | 0.640  | 0.076    | 0.537        | 0.666        | 0.014    | 0.089        | 0.353  | 0.100   |
|                                                 | Methylglutaryl carnitine (C5-M-DC)        | Plasma | LC/MS | μmol/L | 0.050 [0.037 – 0.057] | 0.047 [0.038 – 0.056] | 0.039 [0.035 – 0.055] | 0.042 [0.036 – 0.063] | Inverse | 0.922        | 0.931  | 0.000    | 0.066        | 0.155        | 0.115    | <b>0.022</b> | 0.325  | 0.173   |
|                                                 | Methylcrotonyl carnitine (C5:1)           | Plasma | LC/MS | μmol/L | 0.010 [0.009 – 0.014] | 0.011 [0.010 – 0.014] | 0.011 [0.010 – 0.014] | 0.013 [0.010 – 0.014] | X       | 0.174*       | 0.641* | NA       | 0.253*       | 0.449*       | NA       | 0.775*       | 0.855* | NA      |
|                                                 | Hexanoylcarnitine (C6:0)                  | Plasma | LC/MS | μmol/L | 0.044 [0.038 – 0.049] | 0.042 [0.039 – 0.065] | 0.036 [0.034 – 0.044] | 0.036 [0.031 – 0.039] | Inverse | <b>0.011</b> | 0.376  | 0.210    | 0.861        | 0.943        | 0.001    | 0.086        | 0.353  | 0.101   |
|                                                 | Octanoylcarnitine (C8:0)                  | Plasma | LC/MS | μmol/L | 0.145 [0.119 – 0.208] | 0.156 [0.131 – 0.254] | 0.159 [0.131 – 0.176] | 0.147 [0.126 – 0.165] | Inverse | 0.402        | 0.855  | 0.025    | 0.532        | 0.666        | 0.014    | <b>0.026</b> | 0.325  | 0.165   |
|                                                 | Octenoylcarnitine (C8:1)                  | Plasma | LC/MS | μmol/L | 0.138 [0.101 – 0.159] | 0.143 [0.125 – 0.170] | 0.117 [0.085 – 0.138] | 0.135 [0.101 – 0.155] | Log     | 0.241        | 0.775  | 0.049    | <b>0.005</b> | <b>0.018</b> | 0.251    | 0.941        | 0.982  | 0.000   |
|                                                 | Decanoylcarnitine (C10:0)                 | Plasma | LC/MS | μmol/L | 0.284 [0.216 – 0.425] | 0.320 [0.261 – 0.565] | 0.347 [0.255 – 0.398] | 0.306 [0.238 – 0.371] | Inverse | 0.745        | 0.897  | 0.004    | 0.478        | 0.648        | 0.018    | <b>0.038</b> | 0.325  | 0.145   |
|                                                 | Decenoylcarnitine (C10:1)                 | Plasma | LC/MS | μmol/L | 0.177 [0.162 – 0.193] | 0.189 [0.178 – 0.281] | 0.213 [0.178 – 0.262] | 0.213 [0.160 – 0.228] | Inverse | 0.822        | 0.897  | 0.002    | 0.748        | 0.829        | 0.004    | 0.065        | 0.346  | 0.117   |
|                                                 | Dodecanoylcarnitine (C12:0)               | Plasma | LC/MS | μmol/L | 0.093 [0.073 – 0.128] | 0.116 [0.088 – 0.160] | 0.123 [0.094 – 0.166] | 0.097 [0.087 – 0.172] | Log     | 0.808        | 0.897  | 0.002    | 0.514        | 0.655        | 0.015    | 0.081        | 0.352  | 0.105   |
|                                                 | Hydroxydodecanoylcarnitine-a (C12:0-OH-a) | Plasma | LC/MS | μmol/L | 0.012 [0.008 – 0.013] | 0.015 [0.012 – 0.021] | 0.019 [0.014 – 0.025] | 0.016 [0.014 – 0.024] | Log     | <b>0.036</b> | 0.464  | 0.148    | 0.052        | 0.133        | 0.129    | 0.061        | 0.346  | 0.120   |
|                                                 | Hydroxydodecanoylcarnitine-a (C12:0-OH-b) | Plasma | LC/MS | μmol/L | 0.024 [0.015 – 0.027] | 0.023 [0.018 – 0.027] | 0.030 [0.022 – 0.035] | 0.024 [0.021 – 0.030] | Log     | 0.168        | 0.640  | 0.067    | 0.393        | 0.570        | 0.026    | 0.648        | 0.783  | 0.008   |
|                                                 | Dodecenoylcarnitine (C12:1)               | Plasma | LC/MS | μmol/L | 0.127 [0.094 – 0.139] | 0.135 [0.103 – 0.171] | 0.154 [0.125 – 0.185] | 0.134 [0.116 – 0.172] | Log     | 0.298        | 0.806  | 0.040    | 0.736        | 0.824        | 0.004    | 0.112        | 0.372  | 0.088   |
|                                                 | Tetradecanoylcarnitine (C14:0)            | Plasma | LC/MS | μmol/L | 0.045 [0.039 – 0.058] | 0.051 [0.041 – 0.059] | 0.045 [0.037 – 0.057] | 0.042 [0.037 – 0.056] | Log     | 0.407        | 0.855  | 0.025    | 0.961        | 0.972        | 8.90E-05 | 0.340        | 0.615  | 0.032   |
|                                                 | Hydroxytetradecanoylcarnitine (C14:0-OH)  | Plasma | LC/MS | μmol/L | 0.024 [0.020 – 0.029] | 0.027 [0.024 – 0.029] | 0.028 [0.025 – 0.036] | 0.029 [0.025 – 0.032] | Log     | 0.281        | 0.806  | 0.041    | 0.588        | 0.698        | 0.011    | 0.244        | 0.547  | 0.048   |
|                                                 | Tetradecenoylcarnitine (C14:1)            | Plasma | LC/MS | μmol/L | 0.184 [0.130 – 0.200] | 0.188 [0.155 – 0.248] | 0.186 [0.158 – 0.251] | 0.170 [0.152 – 0.267] | Log     | 0.828        | 0.897  | 0.002    | 0.435        | 0.613        | 0.022    | 0.137        | 0.409  | 0.077   |
|                                                 | Tetradecadienyl carnitine (C14:2)         | Plasma | LC/MS | μmol/L | 0.064 [0.057 – 0.074] | 0.080 [0.066 – 0.096] | 0.086 [0.064 – 0.102] | 0.075 [0.062 – 0.104] | Log     | 0.658        | 0.897  | 0.007    | 0.638        | 0.730        | 0.008    | 0.107        | 0.367  | 0.090   |
|                                                 | Hexadecanoylcarnitine (C16:0)             | Plasma | LC/MS | μmol/L | 0.102 [0.087 – 0.111] | 0.092 [0.088 – 0.107] | 0.093 [0.087 – 0.099] | 0.086 [0.088 – 0.091] | Log     | 0.088        | 0.640  | 0.101    | 0.084        | 0.183        | 0.103    | 0.944        | 0.982  | 1.7E-04 |
|                                                 | Hydroxyhexadecanoylcarnitine (C16:0-OH)   | Plasma | LC/MS | μmol/L | 0.004 (0.002)         | 0.004 (0.001)         | 0.003 (0.001)         | 0.003 (0.001)         | -       | 0.123        | 0.640  | 0.083    | 0.304        | 0.508        | 0.038    | 0.654        | 0.783  | 0.007   |
|                                                 | Hexadecenyl carnitine (C16:1)             | Plasma | LC/MS | μmol/L | 0.036 [0.031 – 0.045] | 0.036 [0.031 – 0.048] | 0.038 [0.032 – 0.043] | 0.037 [0.033 – 0.039] | Log     | 0.685        | 0.897  | 0.006    | 0.607        | 0.711        | 0.010    | 0.101        | 0.367  | 0.093   |
|                                                 | Octadecanoylcarnitine (C18:0)             | Plasma | LC/MS | μmol/L | 0.058 [0.051 – 0.075] | 0.058 [0.050 – 0.067] | 0.057 [0.052 – 0.062] | 0.061 [0.048 – 0.068] | Log     | 0.714        | 0.897  | 0.005    | 0.327        | 0.511        | 0.034    | 0.642        | 0.783  | 0.008   |
|                                                 | Octadecenyl carnitine (C18:1)             | Plasma | LC/MS | μmol/L | 0.112 (0.028)         | 0.112 (0.028)         | 0.114 (0.020)         | 0.109 (0.019)         | -       | 0.907        | 0.931  | 4.98E-04 | 0.468        | 0.643        | 0.019    | 0.515        | 0.708  | 0.015   |

|                                                          |                                   |        |       |        |                       |                       |                       |                       |     |               |        |          |                 |               |          |               |        |                       |
|----------------------------------------------------------|-----------------------------------|--------|-------|--------|-----------------------|-----------------------|-----------------------|-----------------------|-----|---------------|--------|----------|-----------------|---------------|----------|---------------|--------|-----------------------|
|                                                          | Octadecadienylcarnitine (C18:2)   | Plasma | LC/MS | μmol/L | 0.037 [0.032 – 0.046] | 0.042 [0.032 – 0.045] | 0.039 [0.035 – 0.042] | 0.038 [0.036 – 0.042] | Log | 0.822         | 0.897  | 0.002    | 0.497           | 0.648         | 0.017    | 0.491         | 0.684  | 0.017                 |
| Lipid metabolites – Cholesterol metabolites <sup>b</sup> | Total cholesterol                 | Plasma | NMR   | mmol/L | 4.07 [3.82 – 4.61]    | 4.03 [3.72 – 4.24]    | 4.17 [3.88 – 4.56]    | 3.87 [3.48 – 4.35]    | Log | 0.899         | 0.931  | 0.001    | <b>9.70E-05</b> | <b>0.001</b>  | 0.424    | 0.398         | 0.622  | 0.026                 |
|                                                          | VLDL cholesterol                  | Plasma | NMR   | mmol/L | 0.48 (0.08)           | 0.44 (0.07)           | 0.44 (0.13)           | 0.45 (0.15)           | -   | 0.745         | 0.897  | 0.004    | 0.175           | 0.339         | 0.065    | <b>0.010</b>  | 0.247  | 0.216                 |
|                                                          | LDL cholesterol                   | Plasma | NMR   | mmol/L | 1.57 (0.31)           | 1.50 (0.23)           | 1.55 (0.30)           | 1.40 (0.28)           | -   | 0.567         | 0.897  | 0.012    | <b>0.002</b>    | <b>0.010</b>  | 0.292    | 0.229         | 0.524  | 0.051                 |
|                                                          | HDL cholesterol                   | Plasma | NMR   | mmol/L | 1.55 [1.35 – 1.61]    | 1.45 [1.32 – 1.57]    | 1.47 [1.41 – 1.68]    | 1.40 [1.30 – 1.58]    | Log | 0.626         | 0.897  | 0.009    | <b>1.06E-04</b> | <b>0.001</b>  | 0.421    | 0.169         | 0.443  | 0.066                 |
|                                                          | Total esterified cholesterol      | Plasma | NMR   | mmol/L | 3.04 [2.80 – 3.42]    | 2.99 [2.76 – 3.14]    | 3.12 [2.91 – 3.36]    | 2.83 [2.57 – 3.23]    | Log | 0.908         | 0.931  | 4.80E-05 | <b>9.50E-05</b> | <b>0.001</b>  | 0.425    | 0.298         | 0.613  | 0.039                 |
|                                                          | Total free cholesterol            | Plasma | NMR   | mmol/L | 1.05 [1.01 – 1.18]    | 1.04 [0.95 – 1.09]    | 1.10 [0.98 – 1.19]    | 1.01 [0.91 – 1.13]    | Log | 0.894         | 0.931  | 0.001    | <b>1.49E-04</b> | <b>0.001</b>  | 0.407    | 0.980         | 0.989  | 0.000                 |
| Lipid metabolites – Apolipoproteins <sup>b</sup>         | Apolipoprotein B                  | Plasma | NMR   | mmol/L | 0.706 (0.106)         | 0.676 (0.086)         | 0.694 (0.114)         | 0.664 (0.115)         | -   | 0.763         | 0.897  | 0.003    | <b>0.001</b>    | <b>0.008</b>  | 0.317    | 0.989         | 0.989  | 7.00x10 <sup>-6</sup> |
|                                                          | Apolipoprotein A1                 | Plasma | NMR   | mmol/L | 1.53 (0.19)           | 1.48 (0.16)           | 1.58 (0.19)           | 1.50 (0.19)           | -   | 0.615         | 0.897  | 0.009    | <b>1.33E-04</b> | <b>0.001</b>  | 0.412    | 0.384         | 0.615  | 0.027                 |
| Lipid metabolites – Lipoproteins <sup>a, s</sup>         | Total lipoprotein particles       | Plasma | NMR   | μmol/L | 18.1 [15.5 – 18.9]    | 17.2 [15.4 – 18.6]    | 18.3 [16.3 – 18.7]    | 16.1 [15.4 – 18.2]    | X   | 0.595*        | 0.897* | NA       | <b>0.002*</b>   | <b>0.010*</b> | NA       | 0.187*        | 0.443* | NA                    |
|                                                          | VLDL particles                    | Plasma | NMR   | μmol/L | 0.108 [0.100 – 0.116] | 0.098 [0.089 – 0.106] | 0.102 [0.076 – 0.116] | 0.101 [0.077 – 0.114] | Log | 0.610         | 0.897  | 0.009    | <b>0.048</b>    | 0.126         | 0.133    | 0.065         | 0.346  | 0.116                 |
|                                                          | LDL particles                     | Plasma | NMR   | μmol/L | 1.02 (0.17)           | 0.99 (0.14)           | 1.01 (0.17)           | 0.95 (0.17)           | -   | 0.825         | 0.897  | 0.002    | <b>4.20E-04</b> | <b>0.003</b>  | 0.364    | 0.326         | 0.615  | 0.034                 |
|                                                          | HDL particles                     | Plasma | NMR   | μmol/L | 16.8 [14.2 – 17.1]    | 15.9 [14.1 – 17.3]    | 16.9 [14.7 – 17.3]    | 14.8 [14.3 – 16.8]    | X   | 0.567*        | 0.897* | NA       | <b>0.003*</b>   | <b>0.013*</b> | NA       | 0.148*        | 0.412* | NA                    |
|                                                          | Chylomicrons & XXL-VLDL particles | Plasma | NMR   | nmol/L | 0.18 [0.03 – 0.60]    | 0.09 [0.03 – 0.43]    | 0.02 [0.02 – 0.23]    | 0.35 [0.04 – 0.62]    | X   | <b>0.045*</b> | 0.464* | NA       | 0.229*          | 0.429         | NA       | <b>0.007*</b> | 0.247* | NA                    |
|                                                          | XL-VLDL particles                 | Plasma | NMR   | nmol/L | 1.85 [1.56 – 2.39]    | 1.58 [1.26 – 2.04]    | 1.68 [1.19 – 1.85]    | 1.64 [1.21 – 1.99]    | X   | 0.174*        | 0.640* | NA       | 0.491*          | 0.648*        | NA       | <b>0.041*</b> | 0.325* | NA                    |
|                                                          | L-VLDL particles                  | Plasma | NMR   | nmol/L | 6.79 [6.21 – 8.06]    | 6.03 [5.05 – 7.57]    | 6.32 [5.02 – 7.13]    | 5.94 [4.60 – 6.98]    | Log | 0.312         | 0.812  | 0.037    | 0.083           | 0.183         | 0.104    | 0.103         | 0.367  | 0.092                 |
|                                                          | M-VLDL particles                  | Plasma | NMR   | nmol/L | 25.3 [23.4 – 29.7]    | 24.5 [21.2 – 27.2]    | 26.1 [17.8 – 28.4]    | 23.0 [17.7 – 27.2]    | Log | 0.403         | 0.855  | 0.025    | <b>0.016</b>    | <b>0.051</b>  | 0.191    | 0.363         | 0.615  | 0.030                 |
|                                                          | S-VLDL particles                  | Plasma | NMR   | nmol/L | 30.5 [27.9 – 34.1]    | 28.9 [24.9 – 33.3]    | 32.1 [20.0 – 34.8]    | 27.7 [20.3 – 32.7]    | Log | 0.516         | 0.897  | 0.015    | 0.125           | 0.257         | 0.082    | 0.347         | 0.615  | 0.032                 |
|                                                          | XS-VLDL particles                 | Plasma | NMR   | nmol/L | 40.0 [35.6 – 43.7]    | 37.0 [34.0 – 39.9]    | 38.2 [33.7 – 45.1]    | 39.7 [34.1 – 44.3]    | Log | 0.795         | 0.897  | 0.002    | 0.316           | 0.508         | 0.036    | <b>0.014</b>  | 0.294  | 0.196                 |
|                                                          | IDL particles                     | Plasma | NMR   | nmol/L | 246 (36)              | 231 (28)              | 247 (32)              | 242 (36)              | -   | 0.678         | 0.897  | 0.006    | <b>0.002</b>    | <b>0.010</b>  | 0.297    | 0.079         | 0.352  | 0.106                 |
|                                                          | L-LDL particles                   | Plasma | NMR   | nmol/L | 617 (87)              | 598 (85)              | 601 (99)              | 591 (105)             | -   | 0.739         | 0.897  | 0.004    | <b>0.042</b>    | 0.114         | 0.140    | 0.482         | 0.680  | 0.018                 |
|                                                          | M-LDL particles                   | Plasma | NMR   | nmol/L | 254 (57)              | 244 (40)              | 255 (60)              | 222 (48)              | -   | 0.574         | 0.897  | 0.011    | <b>0.004</b>    | <b>0.015</b>  | 0.265    | 0.093         | 0.354  | 0.098                 |
|                                                          | S-LDL particles                   | Plasma | NMR   | nmol/L | 152 (28)              | 145 (21)              | 149 (22)              | 138 (20)              | -   | 0.544         | 0.897  | 0.013    | <b>0.001</b>    | <b>0.008</b>  | 0.315    | 0.410         | 0.631  | 0.024                 |
|                                                          | XL-HDL particles                  | Plasma | NMR   | nmol/L | 240 [205 – 261]       | 224 [193 – 270]       | 216 [183 – 283]       | 236 [191 – 279]       | Log | 0.560         | 0.897  | 0.012    | 0.497           | 0.648         | 0.017    | 0.267         | 0.574  | 0.044                 |
|                                                          | L-HDL particles                   | Plasma | NMR   | μmol/L | 1.78 [1.53 – 1.98]    | 1.70 [1.35 – 1.83]    | 1.61 [1.32 – 2.18]    | 1.63 [1.30 – 1.98]    | Log | 0.558         | 0.897  | 0.012    | 0.066           | 0.155         | 0.116    | 0.526         | 0.713  | 0.014                 |
|                                                          | M-HDL particles                   | Plasma | NMR   | μmol/L | 4.21 (0.73)           | 4.02 (0.62)           | 4.37 (0.71)           | 4.09 (0.67)           | -   | 0.644         | 0.897  | 0.008    | <b>1.41E-04</b> | <b>0.001</b>  | 0.409    | 0.380         | 0.615  | 0.028                 |
|                                                          | S-HDL particles                   | Plasma | NMR   | μmol/L | 10.03 (1.29)          | 9.81 (0.99)           | 10.11 (1.19)          | 9.38 (0.965)          | -   | 0.644         | 0.897  | 0.008    | <b>0.016</b>    | <b>0.051</b>  | 0.189    | 0.181         | 0.443  | 0.063                 |
| Other metabolites – Fluid balance <sup>b</sup>           | Creatinine                        | Plasma | NMR   | μmol/L | 60.6 [59.1 – 66.1]    | 59.8 [55.4 – 66.9]    | 63.0 [61.1 – 69.6]    | 67.9 [64.1 – 71.1]    | Log | 0.078         | 0.640  | 0.107    | 0.382           | 0.570         | 0.027    | <b>0.035</b>  | 0.325  | 0.149                 |
|                                                          | Albumin                           | Plasma | NMR   | g/L    | 38.2 (2.6)            | 38.3 (2.1)            | 39.1 (2.8)            | 38.9 (1.9)            | -   | 0.370         | 0.855  | 0.029    | 0.951           | 0.972         | 1.36E-04 | 0.623         | 0.773  | 0.009                 |

Normally distributed data is represented as mean (SD) and non-normally distributed data is represented as mean [IQR]. Raw P-values were adjusted using an FDR of 10%. Significant raw P-values are indicated in **bold**. Significant FDR-adjusted P-values (< 0.10) are indicated in **underlined bold**.

<sup>a</sup>Transformations (log, inverse, inverse square root) were applied on not-normally distributed variables. Variables that did not achieve a normal distribution after transformation are represented with an X. For these variables non-parametric tests were used: the fitness level effect ( $P_{\text{group}}$ ) was analyzed using a Mann-Whitney U test on the ranked baseline values; the exercise effect ( $P_{\text{exercise}}$ ) was analyzed using a Wilcoxon-Signed rank test on the ranked baseline and post-exercise values; the interaction effect ( $P_{\text{group} \times \text{exercise}}$ ) was analyzed using a Mann-Whitney U test on the ranked difference between baseline and post-exercise values. These p-values are marked with an asterisk (\*). NA = not applicable

<sup>s</sup>Abbreviations: FA = fatty acid, PUFA = polyunsaturated fatty acid, ARA & EPA = arachidonic acid & eicosapentaenoic acid, DHA = docosahexaenoic acid, MUFA = monounsaturated fatty acid, SFA = saturated fatty acid, XXL = extremely large, XL = very large, L = large, M = medium, I = intermediate, S = small, XS = very small.

<sup>b</sup>Refer to the two isomers 2-methylbutyrylcarnitine (C4:0-2M) and isovalerylcarnitine (C5:0).

<sup>a</sup>Analyzed using the EURECAT platform.

<sup>b</sup>Analyzed using the Nightingale platform.
