# Supplementary material for: Single and Joined Behaviour of Circulating Biomarkers and Metabolic Parameters in High-Fit and Low-Fit Healthy Females
Source: MDPI journal article supplement (doi:10.3390/ijms24044202), 2023-02-20
Supplement: s1 [file s1]

**Supplementary Table S11:** Standards and internal standards used for LC-MS/MS analyses

| <b>Standards</b>                               | <b>Company<sup>#</sup></b> | <b>Catalogue number #</b> |
|------------------------------------------------|----------------------------|---------------------------|
| L-carnitine (C0)                               | CIL                        | NSK-B-US-1                |
| O-acetyl-L-carnitine (C2:0)                    | CIL                        | NSK-B-US-1                |
| O-propionyl-L-carnitine (C3:0)                 | CIL                        | NSK-B-US-1                |
| O-butyryl-L-carnitine (C4:0)                   | CIL                        | NSK-B-US-1                |
| O-isovaleryl-L-carnitine (C5:0)                | CIL                        | NSK-B-US-1                |
| O-glutaryl-L-carnitine (C5:0-DC)               | CIL                        | NSK-B-G1-US-1             |
| O-3-hydroxyisovaleryl-L-carnitine (C5:0-OH)    | CIL                        | NSK-B-G1-US-1             |
| O-octanoyl-L-carnitine (C8:0)                  | CIL                        | NSK-B-US-1                |
| O-dodecanoyl-L-carnitine (C12:0)               | CIL                        | NSK-B-G1-US-1             |
| O-myristoyl-L-carnitine (C14:0)                | CIL                        | NSK-B-US-1                |
| O-palmitoyl-L-carnitine (C16:0)                | CIL                        | NSK-B-US-1                |
| O-2-DL-hydroxypalmitoyl-L-carnitine (C16:0-OH) | CIL                        | NSK-B-G1-US-1             |
| O-octadecanoyl-L-carnitine (C18:0)             | CIL                        | NSK-B-G1-US-1             |
|                                                |                            |                           |
| <b>Internal standards</b>                      | <b>Company<sup>#</sup></b> | <b>Catalogue number #</b> |
| L-carnitine (C0)                               | CIL                        | NSK-B-1                   |
| O-acetyl-L-carnitine (C2:0)                    | CIL                        | NSK-B-1                   |
| O-propionyl-L-carnitine (C3:0)                 | CIL                        | NSK-B-1                   |
| O-butyryl-L-carnitine (C4:0)                   | CIL                        | NSK-B-1                   |
| O-isovaleryl-L-carnitine (C5:0)                | CIL                        | NSK-B-1                   |
| O-octanoyl-L-carnitine (C8:0)                  | CIL                        | NSK-B-1                   |
| O-myristoyl-L-carnitine (C14:0)                | CIL                        | NSK-B-1                   |
| O-palmitoyl-L-carnitine (C16:0)                | CIL                        | NSK-B-1                   |

<sup>#</sup>CIL = Cambridge Isotope Laboratories
