# Supplementary material for: Single and Joined Behaviour of Circulating Biomarkers and Metabolic Parameters in High-Fit and Low-Fit Healthy Females
Source: MDPI journal article supplement (doi:10.3390/ijms24044202), 2023-02-20
Supplement: s1 [file s1]

**Supplementary Table S9:** ELISA kits used for serum and plasma biomarker and metabolic parameter analysis

| <b>Biomarker</b> | <b>Matrix</b> | <b>Company</b>              | <b>Catalogue number</b> |
|------------------|---------------|-----------------------------|-------------------------|
| Leptin           | Serum         | R&D Systems <sup>a</sup>    | DLP00                   |
| Insulin          | Serum         | Mercodia <sup>b</sup>       | 10-1113-01              |
| Adiponectin      | Serum         | R&D Systems                 | DRP300                  |
| TNF              | Plasma        | R&D Systems                 | HSTA00E                 |
| IL6              | Plasma        | R&D Systems                 | HS600C                  |
| IL10             | Plasma        | Invitrogen <sup>c</sup>     | BMS215HS                |
| CRP              | Plasma        | R&D Systems                 | DCRP00                  |
| CD14             | Plasma        | R&D Systems                 | DC140                   |
| MCP1             | Plasma        | R&D Systems                 | DCP00                   |
| Soluble ICAM-1   | Plasma        | R&D Systems                 | BBE1B                   |
| LBP              | Plasma        | Hycult Biotech <sup>d</sup> | HK315-01                |
| Oxidized LDL     | Plasma        | Mercodia                    | 10-1143-01              |

<sup>a</sup>R&D systems Inc., Minneapolis, MN, Canada

<sup>b</sup>Mercodia, Uppsala, Sweden

<sup>c</sup>Invitrogen, Thermo Fisher Scientific, Inc., Waltham, MA, USA

<sup>d</sup>Hycult Biotech, Uden, Netherlands
