# Supplementary material for: Single and Joined Behaviour of Circulating Biomarkers and Metabolic Parameters in High-Fit and Low-Fit Healthy Females
Source: MDPI journal article supplement (doi:10.3390/ijms24044202), 2023-02-20
Supplement: s1 [file s1]

**Supplementary Table S5: Main effect analysis of peptide hormone markers**

| Biomarker   | Fitness level effect   |                        |                        |                        | Recent exercise effect    |                           |                           |                           |
|-------------|------------------------|------------------------|------------------------|------------------------|---------------------------|---------------------------|---------------------------|---------------------------|
|             | RM-ANOVA               |                        | Main effect analysis   |                        | RM-ANOVA                  |                           | Main effect analysis      |                           |
|             | P <sub>group raw</sub> | P <sub>group adj</sub> | P <sub>group raw</sub> | P <sub>group adj</sub> | P <sub>exercise raw</sub> | P <sub>exercise adj</sub> | P <sub>exercise raw</sub> | P <sub>exercise adj</sub> |
| Leptin      | <b>0.001</b>           | <u><b>0.076</b></u>    | <b>0.001</b>           | <u><b>0.076</b></u>    | 0.391                     | 0.570                     | 0.411                     | 0.605                     |
| Insulin     | <b>0.039</b>           | 0.464                  | <b>0.039</b>           | 0.464                  | <b>0.037</b>              | 0.105                     | <b>0.035</b>              | 0.101                     |
| Adiponectin | 0.914                  | 0.931                  | 0.914                  | 0.931                  | <b>1.55E-04</b>           | <u><b>0.001</b></u>       | 1.88E-04                  | <u><b>0.002</b></u>       |

Raw P-values were adjusted using an FDR of 10%. Significant raw P-values are indicated in **bold**. Significant FDR-adjusted P-values (< 0.10) are indicated in **underlined bold**.

**Supplementary Table S6: Main effect analysis of inflammation and oxidative stress related markers**

| Biomarker              | Fitness level effect   |                        |                        |                        | Recent exercise effect    |                           |                           |                           |
|------------------------|------------------------|------------------------|------------------------|------------------------|---------------------------|---------------------------|---------------------------|---------------------------|
|                        | RM-ANOVA               |                        | Main effect analysis   |                        | RM-ANOVA                  |                           | Main effect analysis      |                           |
|                        | P <sub>group raw</sub> | P <sub>group adj</sub> | P <sub>group raw</sub> | P <sub>group adj</sub> | P <sub>exercise raw</sub> | P <sub>exercise adj</sub> | P <sub>exercise raw</sub> | P <sub>exercise adj</sub> |
| TNF-α                  | 0.693                  | 0.897                  | 0.693                  | 0.870                  | <b>1.20E-05</b>           | <u><b>3.09E-04</b></u>    | <b>4.70E-05</b>           | <u><b>0.001</b></u>       |
| IL-6                   | 0.154                  | 0.640                  | 0.154                  | 0.640                  | <b>0.004</b>              | <u><b>0.017</b></u>       | <b>0.007</b>              | <u><b>0.025</b></u>       |
| IL-10                  | <b>0.025</b>           | 0.464                  | <b>0.025</b>           | 0.464                  | <b>3.46E-04</b>           | <u><b>0.003</b></u>       | <b>4.44E-04</b>           | <u><b>0.003</b></u>       |
| CRP                    | 0.065                  | 0.606                  | 0.065                  | 0.606                  | <b>3.31E-04</b>           | <u><b>0.003</b></u>       | <b>3.38E-04</b>           | <u><b>0.003</b></u>       |
| Soluble CD14           | 0.546                  | 0.897                  | 0.546                  | 0.870                  | <b>0.004</b>              | <u><b>0.015</b></u>       | <b>0.005</b>              | <u><b>0.018</b></u>       |
| MCP-1                  | 0.379                  | 0.855                  | 0.379                  | 0.806                  | <b>1.21E-07</b>           | <u><b>4.16E-06</b></u>    | <b>9.03E-06</b>           | <u><b>2.32E-04</b></u>    |
| Soluble ICAM-1         | 0.160                  | 0.640                  | 0.160                  | 0.640                  | 0.939                     | 0.972                     | 0.938                     | 0.979                     |
| LBP                    | 0.604                  | 0.897                  | 0.604                  | 0.870                  | 0.620                     | 0.718                     | 0.614                     | 0.716                     |
| N-acetyl glycoproteins | 0.513                  | 0.897                  | 0.513                  | 0.870                  | <b>1.02E-07</b>           | <u><b>4.16E-06</b></u>    | <b>6.03E-07</b>           | <u><b>3.11E-05</b></u>    |
| Oxidized LDL           | 0.679                  | 0.897                  | 0.679                  | 0.870                  | 0.315                     | 0.508                     | 0.309                     | 0.514                     |

Raw P-values were adjusted using an FDR of 10%. Significant raw P-values are indicated in **bold**. Significant FDR-adjusted P-values (< 0.10) are indicated in **underlined bold**.

**Supplementary Table S7: Main effect analysis of metabolic markers**

| Metabolism class                           | Biomarker     | Fitness level effect      |                           |                           |                           | Recent exercise effect       |                              |                              |                              |
|--------------------------------------------|---------------|---------------------------|---------------------------|---------------------------|---------------------------|------------------------------|------------------------------|------------------------------|------------------------------|
|                                            |               | RM-ANOVA                  |                           | Main effect analysis      |                           | RM-ANOVA                     |                              | Main effect analysis         |                              |
|                                            |               | P <sub>group</sub><br>raw | P <sub>group</sub><br>adj | P <sub>group</sub><br>raw | P <sub>group</sub><br>adj | P <sub>exercise</sub><br>raw | P <sub>exercise</sub><br>adj | P <sub>exercise</sub><br>raw | P <sub>exercise</sub><br>adj |
| Protein and amino acid related metabolites | Isoleucine    | 0.287                     | 0.806                     | 0.287                     | 0.784                     | 0.447                        | 0.622                        | 0.428                        | 0.614                        |
|                                            | Leucine       | 0.081                     | 0.640                     | 0.081                     | 0.640                     | 0.298                        | 0.508                        | 0.286                        | 0.499                        |
|                                            | Valine        | 0.991                     | 0.931                     | 0.991                     | 0.991                     | <b>0.002</b>                 | <b><u>0.009</u></b>          | <b>0.001</b>                 | <b><u>0.008</u></b>          |
|                                            | Alanine       | 0.187                     | 0.664                     | 0.187                     | 0.655                     | 0.060                        | 0.146                        | 0.055                        | 0.144                        |
|                                            | Phenylalanine | 0.129                     | 0.640                     | 0.129                     | 0.640                     | 0.927                        | 0.972                        | 0.983                        | 0.992                        |
|                                            | Glutamine     | 0.406                     | 0.855                     | 0.406                     | 0.806                     | <b>0.005</b>                 | <b><u>0.018</u></b>          | <b>0.004</b>                 | <b><u>0.017</u></b>          |
|                                            | Glutamate     | 0.315                     | 0.812                     | 0.315                     | 0.792                     | 0.984                        | 0.972                        | 0.947                        | 0.979                        |
|                                            | Glycine       | 0.148                     | 0.640                     | 0.148                     | 0.640                     | 0.566                        | 0.685                        | 0.543                        | 0.674                        |
|                                            | Methionine    | <b>0.010</b>              | 0.376                     | <b>0.010</b>              | 0.376                     | 0.963                        | 0.972                        | 0.999                        | 0.999                        |
|                                            | Tyrosine      | 0.676                     | 0.897                     | 0.676                     | 0.870                     | 0.549                        | 0.673                        | 0.526                        | 0.665                        |
|                                            | Tryptophan    | 0.592                     | 0.897                     | 0.592                     | 0.870                     | 0.270                        | 0.472                        | 0.268                        | 0.477                        |
|                                            | Betaine       | 0.740                     | 0.897                     | 0.740                     | 0.882                     | <b>0.002</b>                 | <b><u>0.011</u></b>          | <b>0.002</b>                 | <b><u>0.010</u></b>          |
| Carbohydrate and TCA cycle metabolites     | Glucose       | 0.620                     | 0.897                     | 0.620                     | 0.870                     | 0.363                        | 0.559                        | 0.356                        | 0.560                        |
|                                            | Lactate       | 0.382                     | 0.855                     | 0.382                     | 0.806                     | 0.589                        | 0.698                        | 0.583                        | 0.698                        |
|                                            | Pyruvate      | 0.531                     | 0.897                     | 0.531                     | 0.870                     | 0.123                        | 0.257                        | 0.122                        | 0.255                        |
|                                            | Citrate       | 0.204                     | 0.677                     | 0.204                     | 0.656                     | 0.238                        | 0.435                        | 0.247                        | 0.455                        |
| Lipid metabolites – Fatty acids            | Total FA      | 0.310                     | 0.812                     | 0.310                     | 0.792                     | <b>0.040</b>                 | 0.111                        | 0.036                        | 0.101                        |
|                                            | PUFA          | 0.127                     | 0.640                     | 0.127                     | 0.640                     | 0.074                        | 0.169                        | 0.100                        | 0.218                        |
|                                            | Omega-3 FA    | 0.197                     | 0.677                     | 0.197                     | 0.655                     | 0.515                        | 0.655                        | 0.527                        | 0.665                        |
|                                            | ARA & EPA     | 0.158                     | 0.640                     | 0.158                     | 0.640                     | 0.097                        | 0.208                        | 0.116                        | 0.250                        |
|                                            | DHA           | <b>0.041</b>              | 0.464                     | <b>0.041</b>              | 0.464                     | <b>0.032</b>                 | <b><u>0.095</u></b>          | <b>0.029</b>                 | <b><u>0.088</u></b>          |
|                                            | Linoleic acid | 0.165                     | 0.640                     | 0.165                     | 0.640                     | <b>0.012</b>                 | <b><u>0.041</u></b>          | <b>0.021</b>                 | <b><u>0.065</u></b>          |

|                                    |                                           |              |        |              |        |                 |                        |                 |                        |
|------------------------------------|-------------------------------------------|--------------|--------|--------------|--------|-----------------|------------------------|-----------------|------------------------|
|                                    | MUFA                                      | 0.276        | 0.806  | 0.276        | 0.784  | <b>0.023</b>    | <u><b>0.070</b></u>    | <b>0.036</b>    | 0.101                  |
|                                    | Oleic acid                                | 0.426        | 0.878  | 0.426        | 0.828  | 0.053           | 0.134                  | 0.070           | 0.169                  |
|                                    | SFA                                       | 0.351        | 0.855  | 0.351        | 0.806  | <b>0.012</b>    | <u><b>0.041</b></u>    | <b>0.010</b>    | <u><b>0.037</b></u>    |
|                                    | Phosphoglycerides                         | 0.814        | 0.897  | 0.814        | 0.888  | <b>2.24E-04</b> | <u><b>0.002</b></u>    | <b>1.87E-04</b> | <u><b>0.002</b></u>    |
| Lipid metabolites –<br>Cholines    | Choline                                   | 0.191        | 0.897  | 0.191        | 0.655  | <b>0.015</b>    | <u><b>0.049</b></u>    | <b>0.014</b>    | <u><b>0.049</b></u>    |
|                                    | Lysophosphatidylcholine                   | 0.257        | 0.803  | 0.257        | 0.780  | <b>3.41E-08</b> | <u><b>3.51E-06</b></u> | <b>3.04E-07</b> | <u><b>3.11E-05</b></u> |
| Lipid metabolites – Ketone bodies  | 3-Hydroxybutyrate                         | 0.142        | 0.640  | 0.142        | 0.640  | 0.159           | 0.318                  | 0.157           | 0.316                  |
|                                    | Acetate                                   | 0.166        | 0.640  | 0.166        | 0.640  | 0.160           | 0.318                  | 0.161           | 0.319                  |
|                                    | Acetoacetate                              | 0.143        | 0.640  | 0.143        | 0.640  | 0.241           | 0.435                  | 0.235           | 0.441                  |
|                                    | Acetone                                   | 0.610        | 0.897  | 0.610        | 0.870  | 0.310           | 0.508                  | 0.309           | 0.514                  |
| Lipid metabolites – Acylcarnitines | Carnitine (C:0)                           | 0.466        | 0.897  | 0.466        | 0.870  | 0.878           | 0.946                  | 0.885           | 0.950                  |
|                                    | Acetylcarnitine (C2:0)                    | <b>0.030</b> | 0.464  | <b>0.030</b> | 0.464  | 0.374           | 0.566                  | 0.366           | 0.562                  |
|                                    | Propionylcarnitine (C3:0)                 | 0.357        | 0.855  | 0.357        | 0.806  | 0.906           | 0.962                  | 0.906           | 0.962                  |
|                                    | Butyrylcarnitine (C4:0)                   | <b>0.034</b> | 0.464  | <b>0.034</b> | 0.464  | 0.882           | 0.946                  | 0.881           | 0.950                  |
|                                    | Isobutyrylcarnitine (C4:0-iso)            | 0.640        | 0.897  | 0.640        | 0.870  | 0.713           | 0.807                  | 0.708           | 0.802                  |
|                                    | 2-Methylbutyrylcarnitine (C4:0-2M)        | 0.367        | 0.855  | 0.367        | 0.806  | 0.429           | 0.613                  | 0.436           | 0.614                  |
|                                    | Isovalerylcarnitine (C5:0)                | 0.366        | 0.855  | 0.366        | 0.806  | 0.427           | 0.613                  | 0.436           | 0.614                  |
|                                    | Hydroxyisovalerylcarnitine (C5:0-OH)      | 0.806*       | 0.897* | 0.806*       | 0.888* | 0.187*          | 0.357*                 | 0.187*          | 0.376*                 |
|                                    | Glutaryl carnitine (C5:0-DC)              | 0.140        | 0.640  | 0.140        | 0.640  | 0.537           | 0.666                  | 0.550           | 0.675                  |
|                                    | Methylglutaryl carnitine (C5-M-DC)        | 0.922        | 0.931  | 0.922        | 0.931  | 0.066           | 0.155                  | 0.087           | 0.200                  |
|                                    | Methylcrotonyl carnitine (C5:1)           | 0.174*       | 0.641* | 0.174*       | 0.640* | 0.253*          | 0.449*                 | 0.253*          | 0.457*                 |
|                                    | Hexanoylcarnitine (C6:0)                  | <b>0.011</b> | 0.376  | <b>0.011</b> | 0.376  | 0.861           | 0.943                  | 0.866           | 0.949                  |
|                                    | Octanoylcarnitine (C8:0)                  | 0.402        | 0.855  | 0.402        | 0.806  | 0.532           | 0.666                  | 0.561           | 0.680                  |
|                                    | Octenoylcarnitine (C8:1)                  | 0.241        | 0.775  | 0.241        | 0.752  | <b>0.005</b>    | <u><b>0.018</b></u>    | <b>0.004</b>    | <u><b>0.017</b></u>    |
|                                    | Decanoylcarnitine (C10:0)                 | 0.745        | 0.897  | 0.745        | 0.882  | 0.478           | 0.648                  | 0.504           | 0.657                  |
|                                    | Decenoylcarnitine (C10:1)                 | 0.822        | 0.897  | 0.822        | 0.888  | 0.748           | 0.829                  | 0.759           | 0.840                  |
|                                    | Dodecanoylcarnitine (C12:0)               | 0.808        | 0.897  | 0.808        | 0.888  | 0.514           | 0.655                  | 0.529           | 0.665                  |
|                                    | Hydroxydodecanoylcarnitine-a (C12:0-OH-a) | <b>0.036</b> | 0.464  | <b>0.036</b> | 0.464  | 0.052           | 0.133                  | 0.062           | 0.155                  |

|                                             |                                           |               |        |               |        |                 |                      |                 |                      |
|---------------------------------------------|-------------------------------------------|---------------|--------|---------------|--------|-----------------|----------------------|-----------------|----------------------|
|                                             | Hydroxydodecanoylcarnitine-a (C12:0-OH-b) | 0.168         | 0.640  | 0.168         | 0.640  | 0.393           | 0.570                | 0.386           | 0.585                |
|                                             | Dodecenylcarnitine (C12:1)                | 0.298         | 0.806  | 0.289         | 0.784  | 0.736           | 0.824                | 0.743           | 0.832                |
|                                             | Tetradecanoylcarnitine (C14:0)            | 0.407         | 0.855  | 0.407         | 0.806  | 0.961           | 0.972                | 0.961           | 0.980                |
|                                             | Hydroxytetradecanoylcarnitine (C14:0-OH)  | 0.281         | 0.806  | 0.281         | 0.784  | 0.588           | 0.698                | 0.590           | 0.699                |
|                                             | Tetradecenoylcarnitine (C14:1)            | 0.828         | 0.897  | 0.828         | 0.888  | 0.435           | 0.613                | 0.445           | 0.619                |
|                                             | Tetradecadienylcarnitine (C14:2)          | 0.658         | 0.897  | 0.658         | 0.870  | 0.638           | 0.730                | 0.648           | 0.741                |
|                                             | Hexadecanoylcarnitine (C16:0)             | 0.088         | 0.640  | 0.088         | 0.640  | 0.084           | 0.183                | 0.078           | 0.183                |
|                                             | Hydroxyhexadecanoylcarnitine (C16:0-OH)   | 0.123         | 0.640  | 0.123         | 0.640  | 0.304           | 0.508                | 0.297           | 0.509                |
|                                             | Hexadecenylcarnitine (C16:1)              | 0.685         | 0.897  | 0.685         | 0.870  | 0.607           | 0.711                | 0.618           | 0.716                |
|                                             | Octadecanoylcarnitine (C18:0)             | 0.714         | 0.897  | 0.714         | 0.882  | 0.327           | 0.511                | 0.321           | 0.517                |
|                                             | Octadecenoylcarnitine (C18:1)             | 0.907         | 0.931  | 0.907         | 0.931  | 0.468           | 0.643                | 0.464           | 0.637                |
|                                             | Octadecadienylcarnitine (C18:2)           | 0.822         | 0.897  | 0.822         | 0.888  | 0.497           | 0.648                | 0.493           | 0.657                |
| Lipid metabolites – Cholesterol metabolites | Total cholesterol                         | 0.899         | 0.931  | 0.905         | 0.931  | <b>9.70E-05</b> | <b><u>0.001</u></b>  | <b>8.70E-05</b> | <b><u>0.001</u></b>  |
|                                             | VLDL cholesterol                          | 0.745         | 0.897  | 0.745         | 0.882  | 0.175           | 0.339                | 0.220           | 0.427                |
|                                             | LDL cholesterol                           | 0.567         | 0.897  | 0.567         | 0.870  | <b>0.002</b>    | <b><u>0.010</u></b>  | <b>0.002</b>    | <b><u>0.011</u></b>  |
|                                             | HDL cholesterol                           | 0.626         | 0.897  | 0.627         | 0.870  | <b>1.06E-04</b> | <b><u>0.001</u></b>  | <b>1.19E-04</b> | <b><u>0.001</u></b>  |
|                                             | Total esterified cholesterol              | 0.908         | 0.931  | 0.908         | 0.931  | <b>9.50E-05</b> | <b><u>0.001</u></b>  | <b>1.19E-04</b> | <b><u>0.001</u></b>  |
|                                             | Total free cholesterol                    | 0.894         | 0.931  | 0.897         | 0.931  | <b>1.49E-04</b> | <b><u>0.001</u></b>  | <b>1.07E-04</b> | <b><u>0.001</u></b>  |
| Lipid metabolites – Apolipoproteins         | Apolipoprotein B                          | 0.763         | 0.897  | 0.763         | 0.888  | <b>0.001</b>    | <b><u>0.008</u></b>  | <b>0.001</b>    | <b><u>0.007</u></b>  |
|                                             | Apolipoprotein A1                         | 0.615         | 0.897  | 0.616         | 0.870  | <b>1.33E-04</b> | <b><u>0.001</u></b>  | <b>1.19E-04</b> | <b><u>0.001</u></b>  |
| Lipid metabolites – Lipoproteins            | Total lipoprotein particles               | 0.595*        | 0.897* | 0.595         | 0.870  | <b>0.002*</b>   | <b><u>0.010*</u></b> | <b>0.002</b>    | <b><u>0.010</u></b>  |
|                                             | VLDL particles                            | 0.610         | 0.897  | 0.609         | 0.870  | <b>0.048</b>    | 0.126                | 0.057           | 0.146                |
|                                             | LDL particles                             | 0.825         | 0.897  | 0.649         | 0.870  | <b>4.20E-04</b> | <b><u>0.003</u></b>  | <b>0.002</b>    | <b><u>0.010</u></b>  |
|                                             | HDL particles                             | 0.567*        | 0.897* | 0.567*        | 0.870* | <b>0.003*</b>   | <b><u>0.013*</u></b> | <b>0.003*</b>   | <b><u>0.013*</u></b> |
|                                             | Chylomicrons & XXL-VLDL particles         | <b>0.045*</b> | 0.464* | <b>0.045*</b> | 0.464* | 0.229*          | 0.429*               | 0.229*          | 0.437*               |
|                                             | XL-VLDL particles                         | 0.174*        | 0.640* | 0.174*        | 0.640* | 0.491*          | 0.648*               | 0.491*          | 0.657*               |
|                                             | L-VLDL particles                          | 0.312         | 0.812  | 0.312         | 0.792  | 0.083           | 0.183                | 0.092           | 0.205                |
|                                             | M-VLDL particles                          | 0.403         | 0.855  | 0.403         | 0.806  | <b>0.016</b>    | <b><u>0.051</u></b>  | <b>0.015</b>    | <b><u>0.051</u></b>  |

|                                                |                   |       |       |       |       |                 |                     |                 |                        |
|------------------------------------------------|-------------------|-------|-------|-------|-------|-----------------|---------------------|-----------------|------------------------|
|                                                | S-VLDL particles  | 0.516 | 0.897 | 0.516 | 0.870 | 0.125           | 0.257               | 0.124           | 0.255                  |
|                                                | XS-VLDL particles | 0.795 | 0.897 | 0.795 | 0.888 | 0.316           | 0.508               | 0.359           | 0.560                  |
|                                                | IDL particles     | 0.678 | 0.897 | 0.659 | 0.870 | <b>0.002</b>    | <b><u>0.010</u></b> | <b>0.002</b>    | <b><u>0.011</u></b>    |
|                                                | L-LDL particles   | 0.739 | 0.897 | 0.739 | 0.882 | <b>0.042</b>    | 0.114               | <b>0.040</b>    | 0.108                  |
|                                                | M-LDL particles   | 0.574 | 0.897 | 0.574 | 0.870 | <b>0.004</b>    | <b><u>0.015</u></b> | <b>0.005</b>    | <b><u>0.018</u></b>    |
|                                                | S-LDL particles   | 0.544 | 0.897 | 0.544 | 0.870 | <b>0.001</b>    | <b><u>0.008</u></b> | <b>0.001</b>    | <b><u>0.007</u></b>    |
|                                                | XL-HDL particles  | 0.560 | 0.897 | 0.560 | 0.870 | 0.497           | 0.648               | 0.499           | 0.657                  |
|                                                | L-HDL particles   | 0.558 | 0.897 | 0.558 | 0.870 | 0.066           | 0.155               | 0.063           | 0.155                  |
|                                                | M-HDL particles   | 0.644 | 0.897 | 0.644 | 0.870 | <b>1.41E-04</b> | <b><u>0.001</u></b> | <b>1.00E-06</b> | <b><u>3.43E-05</u></b> |
|                                                | S-HDL particles   | 0.644 | 0.897 | 0.644 | 0.870 | <b>0.016</b>    | <b><u>0.051</u></b> | <b>0.018</b>    | <b><u>0.057</u></b>    |
| Other metabolites – Fluid balance <sup>b</sup> | Creatinine        | 0.078 | 0.640 | 0.078 | 0.640 | 0.382           | 0.570               | 0.411           | 0.605                  |
|                                                | Albumin           | 0.370 | 0.897 | 0.370 | 0.806 | 0.951           | 0.972               | 0.951           | 0.979                  |

Raw P-values were adjusted using an FDR of 10%. Significant raw P-values are indicated in **bold**. Significant FDR-adjusted P-values (< 0.10) are indicated in **underlined bold**. Biomarkers indicated with an asterisk (\*) were analyzed non-parametrically.
