# Supplementary material for: Single and Joined Behaviour of Circulating Biomarkers and Metabolic Parameters in High-Fit and Low-Fit Healthy Females
Source: MDPI journal article supplement (doi:10.3390/ijms24044202), 2023-02-20
Supplement: s1 [file s1]

**Supplementary Table S10:** Selected metabolites from Nightingale platform

| <b>Metabolite</b>                                                | <b>Performed analyses*</b> |
|------------------------------------------------------------------|----------------------------|
| Isoleucine                                                       | B                          |
| Leucine                                                          | B                          |
| Valine                                                           | B                          |
| Alanine                                                          | B                          |
| Glutamine                                                        | B                          |
| Glycine                                                          | B                          |
| Phenylalanine                                                    | B                          |
| Tyrosine                                                         | B                          |
| Glucose                                                          | A                          |
| Lactate                                                          | A                          |
| Pyruvate                                                         | A                          |
| Citrate                                                          | A                          |
| Total fatty acids (FAs)                                          | B                          |
| Polyunsaturated fatty acids (PUFA)                               | B                          |
| Monounsaturated fatty acids (MUFA)                               | B                          |
| Saturated fatty acids (SFA)                                      | B                          |
| Linoleic acid                                                    | B                          |
| Docosahexaenoic acid (DHA)                                       | B                          |
| Phosphoglycerides                                                | A                          |
| 3-Hydroxybutyrate                                                | A, B                       |
| Acetate                                                          | A, B                       |
| Acetoacetate                                                     | A                          |
| Acetone                                                          | A                          |
| Total cholesterol                                                | A                          |
| VLDL cholesterol                                                 | A                          |
| LDL cholesterol                                                  | A                          |
| HDL cholesterol                                                  | A                          |
| Total esterified cholesterol                                     | A                          |
| Total free cholesterol                                           | A                          |
| Apolipoprotein B                                                 | A                          |
| Apolipoprotein A1                                                | A                          |
| Total concentration of lipoprotein particles                     | A                          |
| Concentration of VLDL particles                                  | A                          |
| Concentration of LDL particles                                   | A                          |
| Concentration of HDL particles                                   | A                          |
| Concentration of chylomicrons and extremely large VLDL particles | A                          |
| Concentration of very large VLDL particles                       | A                          |
| Concentration of large VLDL particles                            | A                          |
| Concentration of medium VLDL particles                           | A                          |
| Concentration of small VLDL particles                            | A                          |
| Concentration of very small VLDL particles                       | A                          |
| Concentration of IDL particles                                   | A                          |
| Concentration of large LDL particles                             | A                          |

| <b>Metabolite</b>                         | <b>Performed analyses*</b> |
|-------------------------------------------|----------------------------|
| Concentration of medium LDL particles     | A                          |
| Concentration of small LDL particles      | A                          |
| Concentration of very large HDL particles | A                          |
| Concentration of large HDL particles      | A                          |
| Concentration of medium HDL particles     | A                          |
| Concentration of small HDL particles      | A                          |
| Creatinine                                | A                          |
| Albumin                                   | A                          |

\*A = used for main analyses (RM-ANOVA, main effects, PCA, heatmaps, correlation matrices), B = used for correlation analysis (comparison with serum levels in Eurecat platform)
