# Supplementary material for: Single and Joined Behaviour of Circulating Biomarkers and Metabolic Parameters in High-Fit and Low-Fit Healthy Females
Source: Int J Mol Sci. 2023 Feb 20;24(4):4202. doi: 10.3390/ijms24044202 (PMC9960642; doi:10.3390/ijms24044202)
Supplement: Supplementary file 1 [file ijms-24-04202-s001.zip]

Archive with 10 entries (10 files):
- Figure S1 Eurecat vs Nightingale.pdf
- Figure S2 PCA.pdf
- Figure S3 Correlation plot Baseline.pdf
- Table S10.pdf
- Table S11.pdf
- Table S4 (all data).xlsx
- Table S8 (Corr P values).pdf
- Table S9.pdf
- Tables S1,2,3.pdf
- Tables S5,6,7.pdf
