# Supplementary material for: Single and Joined Behaviour of Circulating Biomarkers and Metabolic Parameters in High-Fit and Low-Fit Healthy Females
Source: Int J Mol Sci. 2023 Feb 20;24(4):4202. doi: 10.3390/ijms24044202 (PMC9960642; doi:10.3390/ijms24044202)
Supplement: Supplementary file 1 [file ijms-24-04202-s001.zip › Table S4 (all data).xlsx]

## Sheet: Sp. Rho - Baseline&Post-ex
	Leptin	Insulin	Adiponectin	TNF-a	IL-6	IL-10	CRP	CD14	MCP-1	ICAM	LBP	N-Acetylglycoproteins	LDLox	Isoleucine	Leucine	Valine	Alanine	Phenylalanine	Glutamine	Glutamate	Glycine	Methionine	Tyrosine	Tryptophan	Betaine	Glucose	Lactate	Pyruvate	Citrate	Total FA	PUFA	Omega-3 FA	ARA & EPA	DHA	Linoleic acid	MUFA	Oleic acid	SFA	Choline	Lysophosphatidylcholine	3-Hydroxybutyrate	Acetate	Acetoacetate	Acetone	C0	C2:0	C3:0	C5-DC	C5-OH
Leptin	1	0.386631	0.0119044	-0.0227018	0.367565	-0.165813	0.32025	0.0235319	0.0542311	-0.00944354	0.2356	0.133259	-0.10714	-0.203154	-0.218536	-0.0956337	-0.135206	-0.122722	-0.156097	0.169205	-0.310004	-0.247793	0.0139417	-0.0346282	0.0951707	0.0678889	0.0558922	0.0320219	-0.158633	0.142084	0.162204	0.0678983	0.0913635	0.130898	0.104187	0.0882525	0.0558948	0.138392	-0.0255834	0.122989	-0.0584761	0.0920053	-0.110462	-0.25516	0.207543	0.163186	0.158264	-0.263451	0.0983188
Insulin	0.386631	1	-0.33157	0.278512	0.0689358	0.196176	0.168415	-0.0865914	0.17752	-0.0111661	0.271467	-0.0928601	0.275831	0.156838	0.103805	0.179329	0.197717	-0.0418215	0.0715879	0.587833	-0.2071	-0.118005	0.135293	0.303189	-0.185261	0.316312	0.264757	-0.00175336	-0.0521394	0.14596	0.167987	0.112907	0.134923	0.294844	-0.083946	-0.0672737	-0.0381143	0.159248	-0.174743	-0.19402	-0.129533	0.118275	-0.166877	-0.423729	0.068258	-0.01375	0.137839	0.151352	-0.01532
Adiponectin	0.0119044	-0.33157	1	-0.527647	-0.225326	-0.466091	0.0424805	0.209757	-0.412101	-0.153711	-0.189489	0.298426	-0.244763	-0.017861	0.0245588	-0.0845257	-0.239033	-0.0416674	-0.0862008	-0.262839	-0.0318095	-0.0718307	0.00443179	-0.094004	-0.0261096	-0.108862	-0.0761943	0.0320219	0.0225476	-0.0774862	-0.0390667	-0.011906	-0.114589	-0.00787729	0.0532468	0.0593989	0.0301161	-0.0752715	0.248938	0.350048	0.182134	-0.0211326	0.156172	0.307822	-0.120797	0.0620444	-0.170568	-0.0738918	0.15197
TNF-a	-0.0227018	0.278512	-0.527647	1	0.13652	0.538424	-0.0661058	0.113663	0.752203	0.176938	0.0907161	-0.235969	0.374887	0.0277004	-0.00169267	0.072111	-0.12061	-0.178522	0.113583	0.111713	-0.0260879	-0.101287	0.0112489	0.0364756	0.0525587	0.236554	-0.156821	-0.211206	0.015196	0.169709	-0.0195644	0.158104	0.0124281	0.254308	-0.0962825	-0.0552471	0.0189805	0.183829	-0.208627	-0.362204	-0.0139656	0.00938216	0.0235631	-0.0239937	0.000676746	0.0525401	0.192903	-0.0289019	-0.0499292
IL-6	0.367565	0.0689358	-0.225326	0.13652	1	0.0882299	0.150576	-0.216313	0.257102	0.287525	0.184416	-0.168646	-0.102466	-0.225976	-0.22808	-0.112744	0.0926305	-0.0207261	-0.159699	-0.0235395	-0.135546	-0.114669	-0.0476425	-0.0395229	0.0513733	-0.0711814	0.0985896	0.165003	-0.0568467	0.209514	0.178571	0.140537	0.0962716	-0.0642501	0.184936	0.181952	0.184653	0.188874	0.0586334	-0.110239	-0.198041	-0.416537	-0.26913	-0.236615	0.177554	-3.07612e-05	0.0554317	0.0761386	-0.109272
IL-10	-0.165813	0.196176	-0.466091	0.538424	0.0882299	1	-0.269362	-0.386538	0.636396	-0.10604	-0.0425152	-0.320127	0.368726	0.150059	0.125173	0.158232	0.2876	0.103606	0.222672	0.0711615	0.20587	0.183636	0.00106187	0.203214	0.0644476	0.171104	0.0304247	-0.0787227	0.0734007	0.298371	0.105857	0.128715	0.110445	0.195162	0.0327012	0.055189	0.111214	0.305816	0.0357918	-0.35755	-0.023503	-0.133942	-0.0235645	-0.086475	-0.021165	-0.0114131	-0.0560503	0.212924	-0.053378
CRP	0.32025	0.168415	0.0424805	-0.0661058	0.150576	-0.269362	1	-0.249316	-0.187671	0.152912	0.473907	0.0448301	0.117291	-0.0947865	-0.110976	-0.152989	-0.324002	-0.13018	-0.571688	-0.0103388	-0.718298	-0.342818	-0.311918	0.0964972	-0.596456	-0.250054	-0.038174	-0.0863453	-0.318035	0.265311	0.302475	0.215293	0.236469	0.289429	0.135501	0.197022	0.271353	0.270971	-0.156579	0.29849	0.133901	-0.100618	0.170753	-0.203113	-0.259528	-0.1128	-0.188163	-0.163288	-0.168889
CD14	0.0235319	-0.0865914	0.209757	0.113663	-0.216313	-0.386538	-0.249316	1	0.0141807	0.207112	-0.17297	0.283534	-0.107939	0.0215564	0.0997123	0.0398474	-0.158155	-0.079544	0.256818	0.0344011	0.209254	0.100009	0.289728	-0.156889	0.303432	0.139254	-0.186502	-0.0632133	0.0982805	-0.32351	-0.162819	-0.108447	-0.167223	-0.059172	-0.140423	-0.113722	-0.110621	-0.338214	0.064682	0.158366	-0.122643	0.0622904	-0.0608754	0.178197	0.306284	0.161155	0.431111	-0.149691	0.366296
MCP-1	0.0542311	0.17752	-0.412101	0.752203	0.257102	0.636396	-0.187671	0.0141807	1	0.078286	-0.135011	-0.340364	0.33846	0.0491793	0.0351763	0.163174	0.106626	-0.0652132	0.222024	0.112988	0.115456	0.0201803	0.0567208	0.083477	0.287852	0.32105	-0.0442031	-0.0597065	0.037928	0.241195	0.0224864	0.125675	0.0564485	0.291275	-0.0495555	-0.0207635	0.0163655	0.248823	-0.0427314	-0.499646	0.00464487	-0.0148574	0.0758867	0.0654896	0.116183	0.134824	0.174629	0.0490664	0.0787227
ICAM	-0.00944354	-0.0111661	-0.153711	0.176938	0.287525	-0.10604	0.152912	0.207112	0.078286	1	0.139194	0.222766	0.00144575	-0.196748	-0.225337	-0.317271	-0.176983	-0.304462	-0.207103	0.0302163	-0.0299945	-0.0579875	-0.246272	-0.252216	-0.121773	-0.0889292	-0.0652435	0.0810545	0.131625	0.118706	0.0927142	0.139673	0.119172	0.0883733	0.0982805	0.155311	0.190756	0.0919438	-0.00301706	-0.0119359	-0.0162109	-0.154203	0.0113507	-0.0364514	-0.0067366	-0.0617367	-0.0507859	0.0711231	-0.174488
LBP	0.2356	0.271467	-0.189489	0.0907161	0.184416	-0.0425152	0.473907	-0.17297	-0.135011	0.139194	1	-0.0816923	0.0695818	0.0630226	0.125012	0.115113	-0.0837551	0.0182914	-0.26579	0.113098	-0.463045	-0.251457	-0.000800197	0.0605618	-0.251186	-0.0359291	0.133719	-0.0072904	-0.24815	-0.0374671	0.0960071	0.0203821	0.0329775	-0.065881	-0.0573388	-0.0141809	0.0105054	-0.0450036	-0.133892	0.079461	-0.0195334	-0.0274697	-0.0589077	-0.261562	-0.123014	-0.135011	0.0647831	-0.127636	-0.102197
N-Acetylglycoproteins	0.133259	-0.0928601	0.298426	-0.235969	-0.168646	-0.320127	0.0448301	0.283534	-0.340364	0.222766	-0.0816923	1	-0.0368917	-0.0628533	-0.0360782	-0.283221	-0.118378	0.0692377	-0.102917	0.160231	0.0662974	0.000830808	-0.0362794	-0.233809	-0.0268248	0.0961524	0.12726	0.242673	0.232489	0.072922	0.299046	0.238352	0.244208	0.00518621	0.379163	0.399655	0.424428	0.025415	0.312116	0.651338	0.213012	0.221289	0.182028	0.11006	0.102368	0.17529	0.00781526	0.139791	0.141286
LDLox	-0.10714	0.275831	-0.244763	0.374887	-0.102466	0.368726	0.117291	-0.107939	0.33846	0.00144575	0.0695818	-0.0368917	1	0.353709	0.280364	0.240623	0.131237	0.0392635	0.130163	0.12865	-0.248323	-0.0541114	-0.0417943	0.0325043	-0.0714319	0.0571842	0.178689	-0.0143037	-0.0382356	0.137039	0.0300537	0.160347	0.0314081	0.317399	-0.101972	-0.0621059	-0.0114128	0.157833	-0.0284157	-0.156028	0.0377434	0.0522625	0.109662	-0.172291	0.156111	0.18724	0.216217	0.259759	0.147324
Isoleucine	-0.203154	0.156838	-0.017861	0.0277004	-0.225976	0.150059	-0.0947865	0.0215564	0.0491793	-0.196748	0.0630226	-0.0628533	0.353709	1	0.82833	0.753427	0.432138	0.455687	0.423798	0.143086	-0.0666	0.190986	0.417698	0.241464	0.0969716	0.316971	0.0986359	-0.127491	-0.0452992	-0.0352909	-0.015721	0.0226373	-0.0420369	0.00804005	-0.079697	-0.0368922	-0.0826263	-0.0409571	0.129677	-0.084922	-0.168448	-0.0277153	-0.0708897	-0.0549072	0.0498876	-0.0815755	0.242879	0.323905	0.34305
Leucine	-0.218536	0.103805	0.0245588	-0.00169267	-0.22808	0.125173	-0.110976	0.0997123	0.0351763	-0.225337	0.125012	-0.0360782	0.280364	0.82833	1	0.8627	0.418846	0.598761	0.466867	0.119338	-0.00236992	0.21758	0.516627	0.272184	0.193774	0.2715	0.0640744	-0.183483	-0.200009	-0.0741687	-0.055335	-0.0522792	-0.102041	-0.0442077	-0.097281	-0.0638589	-0.140296	-0.0765692	0.164061	-0.10435	-0.173943	0.0128641	-0.0591811	-0.0410544	0.0274824	-0.145568	0.251897	0.247095	0.40859
Valine	-0.0956337	0.179329	-0.0845257	0.072111	-0.112744	0.158232	-0.152989	0.0398474	0.163174	-0.317271	0.115113	-0.283221	0.240623	0.753427	0.8627	1	0.425068	0.552602	0.501777	0.193481	0.0156019	0.0416346	0.548126	0.316661	0.255617	0.345241	-0.00916951	-0.224622	-0.338072	-0.0567094	-0.079696	-0.126437	-0.0698515	0.0620219	-0.234161	-0.218499	-0.279037	-0.0383089	-0.0227735	-0.285011	-0.165174	0.0468322	-0.0861873	-0.0617865	0.150805	-0.0723099	0.374873	0.133643	0.448418
Alanine	-0.135206	0.197717	-0.239033	-0.12061	0.0926305	0.2876	-0.324002	-0.158155	0.106626	-0.176983	-0.0837551	-0.118378	0.131237	0.432138	0.418846	0.425068	1	0.679793	0.629336	0.401034	0.356167	0.332651	0.46435	0.228198	0.226371	0.19744	0.578293	0.367686	0.113456	-0.0271335	0.135269	-0.0661662	0.130751	-0.0610854	-0.00596813	-0.0418384	-0.0701441	-0.0403003	0.294252	-0.198622	-0.510306	-0.131483	-0.557928	-0.386944	0.359564	-0.0413154	0.304405	0.480402	0.39768
Phenylalanine	-0.122722	-0.0418215	-0.0416674	-0.178522	-0.0207261	0.103606	-0.13018	-0.079544	-0.0652132	-0.304462	0.0182914	0.0692377	0.0392635	0.455687	0.598761	0.552602	0.679793	1	0.475143	0.287569	0.222288	0.221341	0.527428	0.238925	0.222754	0.15952	0.315495	0.0907622	-0.174374	0.0326682	0.269887	0.0627563	0.22311	-0.0758702	0.16294	0.121181	0.0740925	0.00890671	0.267192	0.0220986	-0.28708	0.0262887	-0.294908	-0.153633	0.203221	-0.0570769	0.354265	0.210399	0.539036
Glutamine	-0.156097	0.0715879	-0.0862008	0.113583	-0.159699	0.222672	-0.571688	0.256818	0.222024	-0.207103	-0.26579	-0.102917	0.130163	0.423798	0.466867	0.501777	0.629336	0.475143	1	0.258451	0.530775	0.38782	0.656099	0.163386	0.584835	0.194613	0.165234	0.0551291	0.0759564	-0.143083	-0.114936	-0.167318	-0.095619	-0.0214341	-0.131701	-0.161327	-0.240524	-0.138777	0.137306	-0.290676	-0.293304	0.177201	-0.254849	-0.0498992	0.409377	0.24159	0.411869	0.226022	0.602098
Glutamate	0.169205	0.587833	-0.262839	0.111713	-0.0235395	0.0711615	-0.0103388	0.0344011	0.112988	0.0302163	0.113098	0.160231	0.12865	0.143086	0.119338	0.193481	0.401034	0.287569	0.258451	1	0.191254	0.108733	0.359394	0.217085	-0.00642161	0.381643	0.219545	0.113203	-0.0201852	0.250377	0.466575	0.212205	0.489699	0.284824	0.262562	0.225853	0.211047	0.23533	0.00777593	-0.0646521	-0.0684944	0.377304	-0.101018	-0.13905	0.260254	0.0826795	0.363888	0.121196	0.327543
Glycine	-0.310004	-0.2071	-0.0318095	-0.0260879	-0.135546	0.20587	-0.718298	0.209254	0.115456	-0.0299945	-0.463045	0.0662974	-0.248323	-0.0666	-0.00236992	0.0156019	0.356167	0.222288	0.530775	0.191254	1	0.42181	0.245279	-0.00621826	0.495404	0.280656	0.0181813	0.12853	0.228512	-0.0910293	0.0816016	-0.0687814	0.112954	-0.0987983	0.158186	0.100505	0.0610992	-0.119639	0.308476	-0.0606233	-0.0671568	0.15228	-0.0973666	0.282379	0.160709	0.0289793	0.113425	0.0903581	0.145815
Methionine	-0.247793	-0.118005	-0.0718307	-0.101287	-0.114669	0.183636	-0.342818	0.100009	0.0201803	-0.0579875	-0.251457	0.000830808	-0.0541114	0.190986	0.21758	0.0416346	0.332651	0.221341	0.38782	0.108733	0.42181	1	0.276973	0.171012	0.302172	0.0784139	0.120128	-0.0236257	0.208294	-0.000338389	0.0967191	-0.0257519	0.0337789	-0.174973	0.20934	0.195219	0.073726	-0.0421448	0.268966	-0.0243193	-0.152336	0.109146	-0.0957332	0.152029	-0.0147968	-0.0806288	-0.067124	0.244916	0.197296
Tyrosine	0.0139417	0.135293	0.00443179	0.0112489	-0.0476425	0.00106187	-0.311918	0.289728	0.0567208	-0.246272	-0.000800197	-0.0362794	-0.0417943	0.417698	0.516627	0.548126	0.46435	0.527428	0.656099	0.359394	0.245279	0.276973	1	0.21177	0.491005	0.265046	0.0358544	0.00504732	-0.0722013	-0.00947911	0.0349009	-0.00544817	0.00510911	-0.0851395	-0.00264676	-0.0248673	-0.147133	-0.0155421	0.133896	-0.0988905	-0.26203	0.0601985	-0.228514	-0.138186	0.319181	0.0757098	0.470693	0.0594174	0.640982
Tryptophan	-0.0346282	0.303189	-0.094004	0.0364756	-0.0395229	0.203214	0.0964972	-0.156889	0.083477	-0.252216	0.0605618	-0.233809	0.0325043	0.241464	0.272184	0.316661	0.228198	0.238925	0.163386	0.217085	-0.00621826	0.171012	0.21177	1	-0.201756	0.0174218	-0.0192071	-0.174957	-0.0988057	0.14196	0.325494	0.221097	0.296446	0.376122	0.0695642	0.104931	0.0933157	0.115335	-0.131219	-0.0451271	-0.183545	0.0264405	-0.172064	-0.113611	-0.099606	-0.132788	0.0837232	0.197239	0.234535
Betaine	0.0951707	-0.185261	-0.0261096	0.0525587	0.0513733	0.0644476	-0.596456	0.303432	0.287852	-0.121773	-0.251186	-0.0268248	-0.0714319	0.0969716	0.193774	0.255617	0.226371	0.222754	0.584835	-0.00642161	0.495404	0.302172	0.491005	-0.201756	1	0.313685	0.0439368	0.0467386	0.0265406	-0.223594	-0.294338	-0.285798	-0.261878	-0.327399	-0.081223	-0.167896	-0.304739	-0.227905	0.169576	-0.296815	-0.0943702	0.228644	-0.052096	0.16728	0.438567	0.197515	0.36769	-0.076948	0.396385
Glucose	0.0678889	0.316312	-0.108862	0.236554	-0.0711814	0.171104	-0.250054	0.139254	0.32105	-0.0889292	-0.0359291	0.0961524	0.0571842	0.316971	0.2715	0.345241	0.19744	0.15952	0.194613	0.381643	0.280656	0.0784139	0.265046	0.0174218	0.313685	1	0.123443	0.124981	0.136301	0.161463	0.132642	0.153979	0.174206	0.0488023	0.0541081	0.0525085	0.0293163	0.153219	0.0688997	-0.0694927	-0.035098	0.173152	0.0374973	0.193885	0.228029	-0.0391584	0.347196	0.264805	0.222017
Lactate	0.0558922	0.264757	-0.0761943	-0.156821	0.0985896	0.0304247	-0.038174	-0.186502	-0.0442031	-0.0652435	0.133719	0.12726	0.178689	0.0986359	0.0640744	-0.00916951	0.578293	0.315495	0.165234	0.219545	0.0181813	0.120128	0.0358544	-0.0192071	0.0439368	0.123443	1	0.661755	0.302716	-0.0790858	0.00436809	-0.163916	-0.0793663	-0.208594	-0.0558307	-0.0752715	-0.0775821	-0.0860992	0.297211	-0.0135048	-0.14233	0.117967	-0.212341	-0.201513	0.120736	-0.0388508	0.0338675	0.346602	0.0630028
Pyruvate	0.0320219	-0.00175336	0.0320219	-0.211206	0.165003	-0.0787227	-0.0863453	-0.0632133	-0.0597065	0.0810545	-0.0072904	0.242673	-0.0143037	-0.127491	-0.183483	-0.224622	0.367686	0.0907622	0.0551291	0.113203	0.12853	-0.0236257	0.00504732	-0.174957	0.0467386	0.124981	0.661755	1	0.493125	-0.0958811	-0.00433733	-0.141827	-0.0500808	-0.319399	0.0320219	0.0237165	0.0871184	-0.113599	0.353519	0.128095	0.000338368	0.0201483	-0.0645052	0.0741026	0.188902	0.206066	0.109231	0.435906	0.00378386
Citrate	-0.158633	-0.0521394	0.0225476	0.015196	-0.0568467	0.0734007	-0.318035	0.0982805	0.037928	0.131625	-0.24815	0.232489	-0.0382356	-0.0452992	-0.200009	-0.338072	0.113456	-0.174374	0.0759564	-0.0201852	0.228512	0.208294	-0.0722013	-0.0988057	0.0265406	0.136301	0.302716	0.493125	1	-0.0833308	-0.0268238	-0.0670984	0.0267631	-0.197117	-0.0673967	-0.0493094	-0.0119665	-0.096927	0.268795	0.109023	0.130579	-0.00175336	0.0503553	0.218493	-0.0760712	0.201144	-0.14233	0.424063	-0.156215
Total FA	0.142084	0.14596	-0.0774862	0.169709	0.209514	0.298371	0.265311	-0.32351	0.241195	0.118706	-0.0374671	0.072922	0.137039	-0.0352909	-0.0741687	-0.0567094	-0.0271335	0.0326682	-0.143083	0.250377	-0.0910293	-0.000338389	-0.00947911	0.14196	-0.223594	0.161463	-0.0790858	-0.0958811	-0.0833308	1	0.679884	0.738236	0.640898	0.526517	0.640469	0.673936	0.687503	0.992187	0.0327258	0.120928	0.0632748	-0.0337445	0.127011	-0.0196561	-0.019287	-0.212464	-0.149466	0.188329	0.0682325
PUFA	0.162204	0.167987	-0.0390667	-0.0195644	0.178571	0.105857	0.302475	-0.162819	0.0224864	0.0927142	0.0960071	0.299046	0.0300537	-0.015721	-0.055335	-0.079696	0.135269	0.269887	-0.114936	0.466575	0.0816016	0.0967191	0.0349009	0.325494	-0.294338	0.132642	0.00436809	-0.00433733	-0.0268238	0.679884	1	0.752154	0.929523	0.490953	0.771614	0.787179	0.817639	0.618515	0.184043	0.421885	0.0172263	0.0503253	-0.0239014	-0.0154421	-0.0210714	-0.102066	0.0155959	0.229677	0.181259
Omega-3 FA	0.0678983	0.112907	-0.011906	0.158104	0.140537	0.128715	0.215293	-0.108447	0.125675	0.139673	0.0203821	0.238352	0.160347	0.0226373	-0.0522792	-0.126437	-0.0661662	0.0627563	-0.167318	0.212205	-0.0687814	-0.0257519	-0.00544817	0.221097	-0.285798	0.153979	-0.163916	-0.141827	-0.0670984	0.738236	0.752154	1	0.646002	0.448944	0.747927	0.800535	0.778636	0.687228	0.0762836	0.413199	-0.0614069	-0.0757126	-0.0203972	-0.0377179	-0.0102447	-0.224646	0.0220892	0.205138	0.11227
ARA & EPA	0.0913635	0.134923	-0.114589	0.0124281	0.0962716	0.110445	0.236469	-0.167223	0.0564485	0.119172	0.0329775	0.244208	0.0314081	-0.0420369	-0.102041	-0.0698515	0.130751	0.22311	-0.095619	0.489699	0.112954	0.0337789	0.00510911	0.296446	-0.261878	0.174206	-0.0793663	-0.0500808	0.0267631	0.640898	0.929523	0.646002	1	0.550774	0.644067	0.629455	0.681397	0.596262	0.0493527	0.2698	0.048758	0.0916096	-0.0187957	0.00873645	-0.00218411	-0.0549719	0.0390371	0.231807	0.15653
DHA	0.130898	0.294844	-0.00787729	0.254308	-0.0642501	0.195162	0.289429	-0.059172	0.291275	0.0883733	-0.065881	0.00518621	0.317399	0.00804005	-0.0442077	0.0620219	-0.0610854	-0.0758702	-0.0214341	0.284824	-0.0987983	-0.174973	-0.0851395	0.376122	-0.327399	0.0488023	-0.208594	-0.319399	-0.197117	0.526517	0.490953	0.448944	0.550774	1	0.176224	0.242934	0.328877	0.533502	-0.220686	0.0245411	0.0147391	0.0495408	0.012616	-0.145853	0.10579	0.0459714	0.100158	-0.0213869	0.244938
Linoleic acid	0.104187	-0.083946	0.0532468	-0.0962825	0.184936	0.0327012	0.135501	-0.140423	-0.0495555	0.0982805	-0.0573388	0.379163	-0.101972	-0.079697	-0.097281	-0.234161	-0.00596813	0.16294	-0.131701	0.262562	0.158186	0.20934	-0.00264676	0.0695642	-0.081223	0.0541081	-0.0558307	0.0320219	-0.0673967	0.640469	0.771614	0.747927	0.644067	0.176224	1	0.974469	0.883181	0.564244	0.242103	0.451964	0.0939125	0.0955735	0.128426	0.191978	0.00944354	-0.0858531	-0.0791473	0.142492	0.0838909
MUFA	0.0882525	-0.0672737	0.0593989	-0.0552471	0.181952	0.055189	0.197022	-0.113722	-0.0207635	0.155311	-0.0141809	0.399655	-0.0621059	-0.0368922	-0.0638589	-0.218499	-0.0418384	0.121181	-0.161327	0.225853	0.100505	0.195219	-0.0248673	0.104931	-0.167896	0.0525085	-0.0752715	0.0237165	-0.0493094	0.673936	0.787179	0.800535	0.629455	0.242934	0.974469	1	0.92834	0.596604	0.258882	0.506445	0.0862223	0.0410656	0.144729	0.166692	-0.0215017	-0.109723	-0.0996955	0.166026	0.0689401
Oleic acid	0.0558948	-0.0381143	0.0301161	0.0189805	0.184653	0.111214	0.271353	-0.110621	0.0163655	0.190756	0.0105054	0.424428	-0.0114128	-0.0826263	-0.140296	-0.279037	-0.0701441	0.0740925	-0.240524	0.211047	0.0610992	0.073726	-0.147133	0.0933157	-0.304739	0.0293163	-0.0775821	0.0871184	-0.0119665	0.687503	0.817639	0.778636	0.681397	0.328877	0.883181	0.92834	1	0.624779	0.223134	0.538386	0.0747212	-0.0675536	0.108959	0.118619	-0.0296855	-0.102715	-0.12754	0.186922	0.00579911
SFA	0.138392	0.159248	-0.0752715	0.183829	0.188874	0.305816	0.270971	-0.338214	0.248823	0.0919438	-0.0450036	0.025415	0.157833	-0.0409571	-0.0765692	-0.0383089	-0.0403003	0.00890671	-0.138777	0.23533	-0.119639	-0.0421448	-0.0155421	0.115335	-0.227905	0.153219	-0.0860992	-0.113599	-0.096927	0.992187	0.618515	0.687228	0.596262	0.533502	0.564244	0.596604	0.624779	1	-0.0020319	0.0658935	0.0771786	-0.0385432	0.139438	-0.0333139	-0.0265465	-0.204589	-0.163616	0.162919	0.0534662
Choline	-0.0255834	-0.174743	0.248938	-0.208627	0.0586334	0.0357918	-0.156579	0.064682	-0.0427314	-0.00301706	-0.133892	0.312116	-0.0284157	0.129677	0.164061	-0.0227735	0.294252	0.267192	0.137306	0.00777593	0.308476	0.268966	0.133896	-0.131219	0.169576	0.0688997	0.297211	0.353519	0.268795	0.0327258	0.184043	0.0762836	0.0493527	-0.220686	0.242103	0.258882	0.223134	-0.0020319	1	0.207882	0.0168401	-0.0800751	-0.0244135	0.143249	0.00594175	-0.0182871	0.0179792	0.193134	0.123139
Lysophosphatidylcholine	0.122989	-0.19402	0.350048	-0.362204	-0.110239	-0.35755	0.29849	0.158366	-0.499646	-0.0119359	0.079461	0.651338	-0.156028	-0.084922	-0.10435	-0.285011	-0.198622	0.0220986	-0.290676	-0.0646521	-0.0606233	-0.0243193	-0.0988905	-0.0451271	-0.296815	-0.0694927	-0.0135048	0.128095	0.109023	0.120928	0.421885	0.413199	0.2698	0.0245411	0.451964	0.506445	0.538386	0.0658935	0.207882	1	0.0641093	-0.0560495	0.0462977	0.0166118	-0.00495278	-0.0426062	-0.076968	0.00226119	0.0403021
3-Hydroxybutyrate	-0.0584761	-0.129533	0.182134	-0.0139656	-0.198041	-0.023503	0.133901	-0.122643	0.00464487	-0.0162109	-0.0195334	0.213012	0.0377434	-0.168448	-0.173943	-0.165174	-0.510306	-0.28708	-0.293304	-0.0684944	-0.0671568	-0.152336	-0.26203	-0.183545	-0.0943702	-0.035098	-0.14233	0.000338368	0.130579	0.0632748	0.0172263	-0.0614069	0.048758	0.0147391	0.0939125	0.0862223	0.0747212	0.0771786	0.0168401	0.0641093	1	0.443047	0.910486	0.662432	-0.409394	0.383432	-0.366083	-0.163442	-0.278867
Acetate	0.0920053	0.118275	-0.0211326	0.00938216	-0.416537	-0.133942	-0.100618	0.0622904	-0.0148574	-0.154203	-0.0274697	0.221289	0.0522625	-0.0277153	0.0128641	0.0468322	-0.131483	0.0262887	0.177201	0.377304	0.15228	0.109146	0.0601985	0.0264405	0.228644	0.173152	0.117967	0.0201483	-0.00175336	-0.0337445	0.0503253	-0.0757126	0.0916096	0.0495408	0.0955735	0.0410656	-0.0675536	-0.0385432	-0.0800751	-0.0560495	0.443047	1	0.467471	0.42053	-0.0646898	0.160356	0.053862	-0.157012	0.126313
Acetoacetate	-0.110462	-0.166877	0.156172	0.0235631	-0.26913	-0.0235645	0.170753	-0.0608754	0.0758867	0.0113507	-0.0589077	0.182028	0.109662	-0.0708897	-0.0591811	-0.0861873	-0.557928	-0.294908	-0.254849	-0.101018	-0.0973666	-0.0957332	-0.228514	-0.172064	-0.052096	0.0374973	-0.212341	-0.0645052	0.0503553	0.127011	-0.0239014	-0.0203972	-0.0187957	0.012616	0.128426	0.144729	0.108959	0.139438	-0.0244135	0.0462977	0.910486	0.467471	1	0.71128	-0.359254	0.307822	-0.332985	-0.158458	-0.20036
Acetone	-0.25516	-0.423729	0.307822	-0.0239937	-0.236615	-0.086475	-0.203113	0.178197	0.0654896	-0.0364514	-0.261562	0.11006	-0.172291	-0.0549072	-0.0410544	-0.0617865	-0.386944	-0.153633	-0.0498992	-0.13905	0.282379	0.152029	-0.138186	-0.113611	0.16728	0.193885	-0.201513	0.0741026	0.218493	-0.0196561	-0.0154421	-0.0377179	0.00873645	-0.145853	0.191978	0.166692	0.118619	-0.0333139	0.143249	0.0166118	0.662432	0.42053	0.71128	1	-0.277492	0.174444	-0.168538	-0.0222414	-0.035193
C0	0.207543	0.068258	-0.120797	0.000676746	0.177554	-0.021165	-0.259528	0.306284	0.116183	-0.0067366	-0.123014	0.102368	0.156111	0.0498876	0.0274824	0.150805	0.359564	0.203221	0.409377	0.260254	0.160709	-0.0147968	0.319181	-0.099606	0.438567	0.228029	0.120736	0.188902	-0.0760712	-0.019287	-0.0210714	-0.0102447	-0.00218411	0.10579	0.00944354	-0.0215017	-0.0296855	-0.0265465	0.00594175	-0.00495278	-0.409394	-0.0646898	-0.359254	-0.277492	1	0.387862	0.749915	0.0658935	0.600711
C2:0	0.163186	-0.01375	0.0620444	0.0525401	-3.07612e-05	-0.0114131	-0.1128	0.161155	0.134824	-0.0617367	-0.135011	0.17529	0.18724	-0.0815755	-0.145568	-0.0723099	-0.0413154	-0.0570769	0.24159	0.0826795	0.0289793	-0.0806288	0.0757098	-0.132788	0.197515	-0.0391584	-0.0388508	0.206066	0.201144	-0.212464	-0.102066	-0.224646	-0.0549719	0.0459714	-0.0858531	-0.109723	-0.102715	-0.204589	-0.0182871	-0.0426062	0.383432	0.160356	0.307822	0.174444	0.387862	1	0.356547	-0.0419294	0.278191
C3:0	0.158264	0.137839	-0.170568	0.192903	0.0554317	-0.0560503	-0.188163	0.431111	0.174629	-0.0507859	0.0647831	0.00781526	0.216217	0.242879	0.251897	0.374873	0.304405	0.354265	0.411869	0.363888	0.113425	-0.067124	0.470693	0.0837232	0.36769	0.347196	0.0338675	0.109231	-0.14233	-0.149466	0.0155959	0.0220892	0.0390371	0.100158	-0.0791473	-0.0996955	-0.12754	-0.163616	0.0179792	-0.076968	-0.366083	0.053862	-0.332985	-0.168538	0.749915	0.356547	1	-0.023718	0.696138
C5-DC	-0.263451	0.151352	-0.0738918	-0.0289019	0.0761386	0.212924	-0.163288	-0.149691	0.0490664	0.0711231	-0.127636	0.139791	0.259759	0.323905	0.247095	0.133643	0.480402	0.210399	0.226022	0.121196	0.0903581	0.244916	0.0594174	0.197239	-0.076948	0.264805	0.346602	0.435906	0.424063	0.188329	0.229677	0.205138	0.231807	-0.0213869	0.142492	0.166026	0.186922	0.162919	0.193134	0.00226119	-0.163442	-0.157012	-0.158458	-0.0222414	0.0658935	-0.0419294	-0.023718	1	0.0576228
C5-OH	0.0983188	-0.01532	0.15197	-0.0499292	-0.109272	-0.053378	-0.168889	0.366296	0.0787227	-0.174488	-0.102197	0.141286	0.147324	0.34305	0.40859	0.448418	0.39768	0.539036	0.602098	0.327543	0.145815	0.197296	0.640982	0.234535	0.396385	0.222017	0.0630028	0.00378386	-0.156215	0.0682325	0.181259	0.11227	0.15653	0.244938	0.0838909	0.0689401	0.00579911	0.0534662	0.123139	0.0403021	-0.278867	0.126313	-0.20036	-0.035193	0.600711	0.278191	0.696138	0.0576228	1
C4:0-iso	0.106528	0.0883475	-0.240495	-0.0474352	0.0718142	0.0494378	-0.0596469	0.103974	0.0573705	0.157069	0.0379297	0.17008	0.244647	0.032351	0.071832	0.118284	0.327596	0.256515	0.208648	0.314558	0.250931	0.0112441	0.0491975	0.141857	0.24166	0.163806	0.252646	0.156177	-0.189553	-0.0230712	0.111251	-0.0554094	0.152231	0.141349	0.00436816	-0.0193798	0.0499592	-0.0336225	-0.0208891	-0.0318864	-0.285776	0.136982	-0.247908	-0.247478	0.534822	0.129476	0.518088	-0.00542977	0.328621
C4:0	0.379249	0.311944	-0.20422	-0.0865927	0.115908	0.0673711	-0.0413732	-0.0274078	0.0915131	-0.175921	-0.0580156	0.144705	0.307638	0.0199858	-0.00560112	0.141051	0.360272	0.242053	0.268139	0.421459	0.146711	-0.0664165	0.184012	0.0540815	0.200625	0.23129	0.285736	0.360977	-0.0160263	0.175613	0.282142	0.0250735	0.310851	0.269828	0.129287	0.0888677	0.13683	0.179427	0.107537	-0.0102747	0.0257467	0.210926	-0.0461718	-0.14233	0.581408	0.487157	0.480882	0.148583	0.361866
C5-M-DC	0.0443617	-0.00892157	-0.0174432	-0.000599908	0.169589	0.104667	0.16185	-0.201197	-0.0466998	0.0646352	0.0141209	0.0255408	0.0129517	-0.195476	-0.315697	-0.314043	-0.00364587	-0.189604	-0.238493	0.0309735	-0.0259672	-0.0088452	-0.263243	-0.163416	-0.289931	-0.0240882	-0.00178431	0.331298	0.383874	0.15945	0.191724	0.0879665	0.190653	0.0696107	0.123487	0.147544	0.201421	0.149082	0.288914	0.146784	0.128532	-0.228392	0.0165203	0.0796788	-0.0107366	0.118011	-0.139576	0.361053	-0.234317
C5:1	0.0285556	-0.066281	0.121454	-0.0511732	0.0132318	-0.0381437	-0.348791	0.437073	0.056465	-0.0226783	-0.142534	0.145786	0.0768047	0.307421	0.440345	0.349498	0.381259	0.491422	0.565111	0.225083	0.240514	0.329841	0.664378	0.13585	0.514114	0.063327	-0.0151394	-0.02514	-0.106253	-0.0844667	0.071544	0.0359764	0.0452203	-0.0383686	0.137608	0.0994831	-0.0331266	-0.116007	0.305426	-0.109767	-0.344975	0.0143701	-0.284602	-0.0532033	0.460551	0.189335	0.600806	0.136171	0.763136
C4:0-2M	0.289195	0.0779205	-0.0637699	-0.0783524	0.042637	-0.185356	-0.107391	0.346412	0.0463278	0.0311005	0.0622943	0.216607	0.103976	0.271146	0.320294	0.379614	0.254119	0.334479	0.470788	0.347765	0.16327	0.0829706	0.47764	-0.00401705	0.550682	0.302915	0.045005	0.138307	-0.139998	-0.00295316	0.113576	-0.0247054	0.117086	0.0915161	0.0782589	0.0613705	0.0077678	-0.0206722	0.115115	-0.0214118	-0.150119	0.314235	-0.0616473	0.0423595	0.638468	0.275906	0.677597	0.0687576	0.702784
C5:0	0.289195	0.0779205	-0.0637699	-0.0783524	0.042637	-0.185356	-0.107391	0.346412	0.0463278	0.0311005	0.0622943	0.216607	0.103976	0.271146	0.320294	0.379614	0.254119	0.334479	0.470788	0.347765	0.16327	0.0829706	0.47764	-0.00401705	0.550682	0.302915	0.045005	0.138307	-0.139998	-0.00295316	0.113576	-0.0247054	0.117086	0.0915161	0.0782589	0.0613705	0.0077678	-0.0206722	0.115115	-0.0214118	-0.150119	0.314235	-0.0616473	0.0423595	0.638468	0.275906	0.677597	0.0687576	0.702784
C6:0	0.194306	0.0946609	-0.196797	0.351546	0.031226	0.00842999	0.203935	0.194306	0.327114	0.158219	-0.0480849	0.182155	0.291489	-0.0130584	-0.130594	-0.0150636	-0.300485	-0.189018	-0.0559504	0.00555462	-0.183032	-0.241959	-0.0333651	-0.252028	0.00432641	0.0695882	-0.216087	-0.0710341	-0.031164	0.128163	0.0916167	0.0871665	0.125815	0.28369	0.0196582	0.064143	0.167379	0.14296	-0.0893668	0.0394573	0.43688	0.059313	0.436234	0.108474	0.141453	0.554706	0.150128	-0.183334	0.0575332
C8:1	0.0345443	0.0987111	-0.271894	0.22591	-0.111325	-0.135265	-0.0673967	0.350211	0.0856071	0.0900366	0.176938	0.103445	0.0928051	-0.0146891	0.0659517	0.144312	-0.0470375	-0.00724248	0.248727	0.321671	0.0138436	-0.0902267	0.372948	-0.0214849	0.232923	-0.00710572	-0.278231	-0.157772	-0.176413	-0.10554	-0.0221481	-0.0239351	0.102223	0.0841885	-0.0985881	-0.122151	-0.118557	-0.10431	-0.235269	-0.0494663	-0.0792088	0.195669	-0.0963118	-0.236335	0.34615	0.279461	0.522778	-0.210662	0.290619
C8:0	-0.239384	-0.207515	-0.114309	0.268703	-0.202627	0.11927	-0.0433117	0.11074	0.224003	0.032207	-0.330842	0.119754	0.183091	0.129602	-0.0101406	-0.0216164	-0.214702	-0.129858	0.0128134	-0.23218	0.0267032	0.0337317	-0.0222978	-0.259977	-0.00926782	0.041866	-0.297245	-0.127567	0.0290693	0.0684744	-0.0798265	0.0392567	-0.0380072	0.0993907	0.0449729	0.0877924	0.156459	0.0828399	-0.000123147	0.0536816	0.358337	-0.0824707	0.410631	0.211545	-0.0312226	0.380239	-0.0816709	-0.0779536	-0.0587584
C10:1	-0.11809	-0.158633	-0.262481	0.200686	-0.0768414	0.0490363	-0.141776	0.137654	0.183918	0.15365	-0.163065	0.171167	0.137777	0.200474	0.107068	0.0388012	-0.0816772	0.0441945	0.0961991	-0.146035	0.0379007	0.198634	0.138278	-0.323504	0.255769	0.115568	-0.163247	-0.103325	0.0138116	0.0466025	-0.112494	0.0347644	-0.0783204	-0.159607	0.115076	0.11846	0.0869338	0.0463564	0.0581861	-0.0448519	0.206435	-0.0557077	0.273124	0.110954	0.0320219	0.283829	0.0213787	-0.0180884	0.0331626
C10:0	-0.25676	-0.184472	-0.109354	0.248427	-0.238615	0.123421	-0.0139961	0.113415	0.191239	0.0349134	-0.292816	0.130367	0.193516	0.163675	0.032068	-0.00858488	-0.191319	-0.10648	0.0412238	-0.2345	-0.000707562	0.0826284	0.00449335	-0.223436	-0.040396	0.00366052	-0.272017	-0.119075	0.0281461	0.075456	-0.0755495	0.0237506	-0.0389756	0.103297	0.0356517	0.0857916	0.16507	0.0899751	0.0114833	0.0593103	0.326279	-0.0944661	0.389769	0.187056	-0.0699806	0.340552	-0.121905	-0.049374	-0.0445449
C12:0-OH-a	-0.194604	-0.0839819	-0.153105	0.212296	-0.238045	0.112477	-0.164857	0.211278	0.101763	0.0468207	-0.0838602	0.221533	0.0894269	0.224092	0.166828	-0.00186171	0.0144751	0.13908	0.147938	-0.0906238	-0.0181516	0.255607	0.2357	-0.266315	0.166443	0.0511582	-0.0188267	-0.0680776	0.125481	-0.118528	-0.131097	-0.0295823	-0.106197	-0.209869	0.0144584	0.00941336	0.00404547	-0.117944	0.19004	-0.0197047	0.124312	-0.0459593	0.110315	0.0301166	-0.0445135	0.213	0.0418679	-0.0637748	0.09994
C12:0-OH-b	-0.126159	0.00501438	-0.100011	0.319449	-0.0104288	0.257414	-0.318398	0.30197	0.347838	0.0801378	-0.146773	0.115623	0.110193	0.211176	0.123511	0.0937332	0.0616549	0.0479273	0.316586	-0.0955488	0.177873	0.240551	0.265482	-0.234582	0.311661	0.252042	-0.00713703	0.0408841	0.269792	-0.102933	-0.14645	-0.111039	-0.122812	-0.0885186	-0.0996108	-0.0647255	-0.0314567	-0.0978881	0.253668	-0.14175	0.161075	-0.0904742	0.163198	0.161383	0.143664	0.378294	0.13225	0.0694673	0.142752
C12:1	-0.16691	-0.0910223	-0.0938216	0.198843	-0.155931	0.171353	-0.108772	0.176139	0.189212	0.0807174	-0.123939	0.148815	0.14224	0.259943	0.188348	0.0976661	-0.0290259	0.085401	0.242547	-0.126252	0.0266724	0.26767	0.232565	-0.244155	0.152981	0.0711814	-0.172693	-0.0984973	0.0540166	0.0366058	-0.0720592	-0.0202129	-0.0671855	-0.020032	0.0137502	0.0620761	0.093949	0.0453727	0.190616	-0.0603572	0.166541	-0.0933602	0.239814	0.10102	0.00550625	0.286233	-0.0249473	-0.00159968	0.163877
C14:2	-0.149405	-0.1929	-0.143499	0.110033	-0.148515	0.0156584	-0.113353	0.0757636	0.0482636	0.0795164	-0.102773	0.151105	0.0852995	0.237028	0.1532	0.0597865	-0.0984434	0.0697436	0.145883	-0.188313	0.0019381	0.286338	0.18355	-0.281181	0.232492	0.0310991	-0.142145	-0.115937	-0.045249	0.0183026	-0.129443	0.00532234	-0.129755	-0.17847	0.135132	0.13667	0.0689072	0.0160263	0.117265	-0.0566647	0.26082	0.0571842	0.320865	0.212403	-0.0406964	0.236088	-0.0559537	-0.055465	0.108932
C12:0	-0.207912	-0.125965	-0.0873297	0.175308	-0.218435	0.101026	-0.0310376	0.094097	0.134578	0.0200867	-0.171832	0.116521	0.120674	0.313522	0.155477	0.0807102	-0.0896758	0.0329456	0.137269	-0.130496	-0.024457	0.214692	0.159698	-0.211494	-0.00705082	0.0861608	-0.237627	-0.100864	0.0404503	0.0710265	-0.0309765	0.0609762	-0.0226409	0.0269551	0.0805623	0.131933	0.15298	0.0733028	0.116803	0.0211031	0.249069	-0.0589683	0.322465	0.190193	-0.0749639	0.28346	-0.0536774	0.000861353	0.0948733
C14:0-OH	-0.11404	-0.0176275	-0.0319941	0.23113	-0.0667579	0.0199209	-0.298591	0.407802	0.169353	0.151111	-0.128624	0.197938	-0.00184581	0.155805	0.0730521	0.000984737	-0.0190752	-0.0630616	0.256196	-0.0244799	0.0305203	0.249385	0.262746	-0.315453	0.27958	0.143174	-0.0568818	0.0749708	0.312004	-0.201655	-0.229161	-0.195176	-0.174207	-0.174855	-0.118194	-0.11684	-0.101032	-0.192672	0.0681671	-0.141136	0.213284	-0.0160586	0.146158	0.18292	0.139543	0.450778	0.123177	0.115478	0.141123
C14:1	-0.146575	-0.180535	-0.0483251	0.207177	-0.150945	0.0654946	-0.00372205	0.173337	0.160909	0.112492	-0.111448	0.14369	0.073918	0.189511	0.0764768	0.0314164	-0.222174	-0.0751985	0.0996754	-0.177605	-0.0442688	0.136032	0.128614	-0.304174	0.0831627	0.0600757	-0.301055	-0.0533083	0.0530007	0.0331293	-0.0873002	-0.0329185	-0.0601092	0.00240011	0.039466	0.0896675	0.127171	0.0387893	0.0676683	-0.00116898	0.357839	-0.019287	0.418253	0.304931	-0.0451875	0.365714	-0.0481405	-0.0608484	0.0897667
C14:0	-0.0943152	-0.0530023	-0.115325	0.178144	-0.122925	0.0560521	0.046081	0.0701673	0.185954	0.0889627	-0.0101823	0.114817	0.117602	0.316889	0.153051	0.148009	-0.0790801	0.0266285	0.164408	0.0294634	-0.109522	0.0784317	0.191112	-0.229646	0.0447849	0.181063	-0.193891	0.0329765	0.0837025	0.175772	0.08315	0.130294	0.117223	0.0734672	0.147164	0.199951	0.207712	0.176295	0.0679166	-0.00502984	0.334133	0.0716131	0.394118	0.266119	0.0362065	0.364587	0.076535	0.0545592	0.178339
C16:1	-0.0986279	-0.150957	-0.0833385	0.225377	-0.00722955	0.139431	-0.0611887	0.126961	0.228327	0.0960438	-0.0540216	0.126148	-0.0215652	0.087835	-0.0119727	0.034035	-0.124788	-0.0401147	0.173879	-0.0630078	0.0279513	0.0294579	0.165284	-0.312729	0.108744	0.0717098	-0.191749	0.0819233	0.101674	0.123546	0.00203043	-0.00136917	0.0290114	0.0314813	0.0953362	0.14385	0.18319	0.129484	0.120155	-0.0231664	0.386575	0.0565126	0.414077	0.324986	0.0496831	0.359872	-0.0161509	-0.0241201	0.133663
C16:0-OH	0.279602	0.126135	-0.110499	0.22214	0.258492	0.144322	0.0763951	0.137093	0.269599	0.131306	0.16415	0.152522	0.0677768	0.0532616	0.0535822	0.132316	0.00100043	0.132295	0.105832	0.23372	-0.0866219	-0.0322129	0.220556	-0.158941	0.181955	0.31229	-0.0290252	0.131614	0.00116963	0.258641	0.242486	0.122582	0.239985	0.130533	0.169504	0.173659	0.221762	0.249161	0.0715452	0.0454643	0.164148	-0.0573117	0.130875	0.120625	0.37188	0.359999	0.374773	-0.00224705	0.411725
C18:2	0.0627894	-0.0736183	-0.18403	0.189525	0.0480234	-0.00341507	-0.415591	0.26857	0.218609	0.0789713	-0.077988	0.147906	-0.0898925	0.0441491	0.0218837	0.12454	-0.0680409	-0.0208051	0.301043	0.0396516	0.21946	0.0714077	0.253655	-0.355446	0.646159	0.2698	-0.0609435	-0.036117	-0.00261494	-0.087739	-0.197047	-0.181579	-0.122154	-0.197584	0.0326099	-0.0290105	-0.119247	-0.0902616	0.00454147	-0.215085	0.29112	0.303456	0.272569	0.304656	0.350187	0.38655	0.232884	-0.0928977	0.215365
C16:0	0.139258	0.0300541	-0.150209	0.346012	0.0206106	0.0752796	-0.0254399	0.217085	0.33561	-0.0286083	0.0962393	-0.0106925	0.131906	0.197416	0.0900516	0.225106	-0.0689586	0.042131	0.264148	0.173195	-0.0447008	0.0127669	0.265469	-0.133884	0.217043	0.25	-0.125846	-0.0271625	0.0195337	0.197121	0.114927	0.127248	0.13768	0.156812	0.086471	0.109388	0.133512	0.207826	0.0801546	-0.058543	0.230189	0.166882	0.251415	0.238003	0.290575	0.361942	0.355512	-0.167584	0.354002
C18:1	-0.163744	-0.169712	-0.0388212	0.350534	-0.049527	0.168987	-0.318045	0.327396	0.436569	0.177402	-0.223149	0.129617	-0.0212563	-0.0756498	-0.105855	-0.0283094	-0.244055	-0.248594	0.147533	-0.05008	0.228119	0.0196271	0.0427804	-0.391218	0.357571	0.23828	-0.224622	0.0307309	0.198966	0.0301157	-0.129601	-0.120402	-0.0366696	0.0449573	-0.00762889	0.0106435	0.0594189	0.0395903	0.0255688	-0.162955	0.451643	0.150578	0.468654	0.491079	0.160545	0.39218	0.0200874	-0.0808774	0.0299642
C18:0	0.0614627	-0.110005	0.0664154	0.304058	-0.0606946	0.055253	-0.302299	0.380435	0.328601	0.0154426	-0.135509	0.108311	0.057033	0.0909567	0.0528592	0.127656	-0.169438	-0.0827068	0.289826	0.0690822	0.140596	0.118211	0.304854	-0.153202	0.418019	0.260217	-0.214474	-0.0727832	0.106375	0.128186	-0.032916	0.135664	-0.0360856	0.173693	0.132923	0.149073	0.0934289	0.117696	0.0798171	0.0169664	0.131139	0.179066	0.200661	0.330785	0.367238	0.232716	0.288887	-0.115734	0.370835
Total cholesterol	-0.0462334	0.242118	-0.0714571	0.190289	0.146731	0.100903	0.19247	-0.126334	0.12941	-0.0199637	0.275805	-0.149905	0.231351	0.310781	0.317725	0.276193	0.145112	0.195424	0.0544216	0.181544	-0.278687	0.10287	0.243656	0.213279	-0.188617	0.0656741	0.152665	-0.200221	-0.211603	0.377711	0.228033	0.422434	0.0974237	0.120898	0.254114	0.29035	0.160794	0.362146	-0.0525214	-0.0481435	-0.158141	-0.110523	-0.080993	-0.220154	-0.150451	-0.34289	-0.0579839	0.121235	0.14474
VLDL cholesterol	0.106463	0.284383	-0.204836	0.261101	0.133227	0.120807	0.33483	-0.126273	0.0728721	0.0913286	0.372764	-0.0390763	0.32148	0.0209097	0.0586271	0.0497554	-0.0774319	-0.0787119	-0.211995	0.192283	-0.459146	-0.201618	-0.0112641	0.00326274	-0.423265	0.0586607	0.0462334	0.0121505	-0.155434	0.449506	0.168694	0.425387	0.0975775	0.145145	0.208958	0.266603	0.263724	0.463533	-0.152577	0.0663549	-0.0307915	-0.148482	0.0120274	-0.248085	0.0460488	-0.0494325	0.106032	0.0988402	-0.0429145
LDL cholesterol	0.0793934	0.281491	-0.256944	0.302998	0.232893	0.0883208	0.305116	-0.171676	0.11323	0.0106124	0.3819	-0.216735	0.339752	0.24913	0.222291	0.247608	-0.00372239	0.0359042	-0.14293	0.0878489	-0.480188	-0.0663857	0.0297299	0.0986826	-0.294472	0.0621059	0.0430958	-0.250915	-0.301178	0.291273	0.122737	0.388162	0.0243944	0.0440943	0.151558	0.186625	0.083796	0.289305	-0.221969	-0.0700157	-0.135132	-0.144299	-0.0903442	-0.285982	-0.134086	-0.28223	-0.00858224	0.111884	-0.0647255
HDL cholesterol	-0.178627	0.00735181	0.151312	0.0293462	0.019195	0.0830295	-0.0647513	0.0263004	0.225261	0.0140576	-0.120707	-0.00981523	0.0243317	0.31423	0.28338	0.197821	0.211499	0.216042	0.213533	0.174867	0.204885	0.257944	0.252335	0.208877	0.120418	0.172291	0.115383	-0.0768095	0.045126	0.334953	0.298322	0.283468	0.213858	0.191178	0.291089	0.317358	0.238314	0.299763	0.31205	-0.0114745	-0.113599	-0.0387277	0.00286075	0.0801932	-0.119936	-0.324741	-0.114091	0.127388	0.230323
Total esterified cholesterol	-0.049494	0.231843	-0.066843	0.187428	0.149346	0.104195	0.168292	-0.120059	0.127319	-0.0305454	0.258086	-0.150428	0.198253	0.305731	0.307785	0.263885	0.161109	0.204084	0.0746951	0.180652	-0.243678	0.129418	0.258737	0.219343	-0.164109	0.0629057	0.167677	-0.187548	-0.184041	0.369282	0.236584	0.414435	0.102838	0.101143	0.262727	0.295088	0.158948	0.35058	-0.0213041	-0.0456825	-0.16054	-0.0966194	-0.0913901	-0.206497	-0.166815	-0.35747	-0.0712726	0.12628	0.147755
Total free cholesterol	-0.0264235	0.240764	-0.0892983	0.184567	0.144147	0.100411	0.25313	-0.134517	0.107324	0.0268541	0.325853	-0.134829	0.244271	0.249962	0.275901	0.227176	0.0911216	0.127992	-0.0173509	0.181298	-0.345321	0.0439905	0.184935	0.195118	-0.272734	0.020948	0.121843	-0.185395	-0.221815	0.403365	0.226741	0.445723	0.101177	0.137945	0.257867	0.305239	0.195001	0.39223	-0.101195	-0.00581413	-0.150389	-0.133286	-0.0672737	-0.25153	-0.130026	-0.32351	-0.0519548	0.0941028	0.105794
Apolipoprotein B	0.0443877	0.28063	-0.269987	0.304413	0.120984	0.104225	0.252699	-0.149282	0.0648128	0.0248239	0.377686	-0.148059	0.348673	0.142549	0.143136	0.146958	-0.0462376	-0.044965	-0.116903	0.130066	-0.444164	-0.0554342	0.0176041	0.0278872	-0.308543	0.0331908	0.0748408	-0.166938	-0.240333	0.283398	0.0455881	0.343091	-0.0348535	0.0192932	0.132486	0.163985	0.0757671	0.292996	-0.256019	-0.0491894	-0.0573072	-0.0601987	-0.0191639	-0.253561	-0.0703497	-0.170384	0.0237165	0.0697696	-0.0722009
Apolipoprotein A1	-0.177643	0.023778	0.216832	0.0111971	0.0538936	0.109117	0.100003	-0.0306684	0.185087	0.0398966	-0.0812711	0.00329226	0.0478944	0.320451	0.30363	0.164159	0.234234	0.255398	0.124102	0.137573	0.0673722	0.157412	0.195984	0.224544	-0.084733	0.0875142	0.138515	-0.026485	0.0279615	0.406687	0.351447	0.314726	0.246866	0.255058	0.300932	0.348857	0.329001	0.380479	0.337418	0.0386686	-0.154142	-0.202375	-0.0423575	-0.012089	-0.174629	-0.347073	-0.174629	0.182945	0.198207
Total lipoprotein particles	-0.141776	0.0741026	0.147744	0.0726887	0.126644	0.125544	0.167738	-0.115506	0.158695	-0.0358362	0.0288232	-0.0468916	0.1096	0.380717	0.373952	0.252623	0.240233	0.308283	0.0670348	0.107173	-0.0917677	0.0986249	0.194599	0.228177	-0.156658	0.0742871	0.142576	-0.0813006	-0.0715187	0.439232	0.357506	0.368964	0.237976	0.20044	0.328986	0.371436	0.327125	0.415854	0.275476	0.0128895	-0.17346	-0.258236	-0.0905288	-0.0863453	-0.234181	-0.408164	-0.194377	0.256222	0.146094
VLDL particles	0.0703497	0.235904	-0.13993	0.232216	0.17377	0.177288	0.39143	-0.221323	0.0714571	0.0501092	0.340034	-0.0396917	0.250915	-0.00997753	0.0293289	0.0221853	-0.0967514	-0.0876494	-0.277584	0.130619	-0.458531	-0.228689	-0.110764	0.0124969	-0.505165	0.0148574	0.0277769	0.0149189	-0.200714	0.543819	0.219942	0.404221	0.1336	0.207425	0.246855	0.317235	0.378159	0.562214	-0.161566	0.103516	-0.0269156	-0.254053	0.0229167	-0.241564	-0.00230705	-0.106278	-0.0422345	0.117605	-0.112162
LDL particles	0.0816082	0.274416	-0.312314	0.301121	0.174754	0.102164	0.251715	-0.176782	0.0675813	0.0392814	0.387929	-0.154798	0.35261	0.14646	0.133996	0.155482	-0.0264567	-0.0131597	-0.132716	0.124896	-0.457177	-0.0783524	0.00196969	0.0102192	-0.296935	0.0142422	0.0809314	-0.170876	-0.24544	0.272202	0.0616762	0.347398	-0.0125817	-0.00172316	0.127811	0.152112	0.064662	0.280815	-0.248014	-0.0642938	-0.0523855	-0.0613061	-0.0403273	-0.271525	-0.0750869	-0.177766	0.0234704	0.0758606	-0.0923508
HDL particles	-0.146021	0.0591528	0.180596	0.0446652	0.11034	0.126467	0.142207	-0.10271	0.166508	-0.0378049	-0.0150115	-0.0325533	0.0875757	0.388015	0.370259	0.251762	0.244878	0.304677	0.0770946	0.105542	-0.0467606	0.115637	0.191244	0.224083	-0.118632	0.108985	0.14356	-0.0701037	-0.0448184	0.430189	0.360644	0.343645	0.250896	0.205086	0.317481	0.3603	0.327617	0.406134	0.299274	0.0164888	-0.173644	-0.250177	-0.0838845	-0.059645	-0.230675	-0.416285	-0.20662	0.257483	0.147478
Phosphoglycerides	-0.112923	0.105355	0.148174	0.0287309	0.138302	0.148032	0.296626	-0.178135	0.135009	0.0516472	0.105911	-0.0264611	0.151497	0.280325	0.286457	0.142651	0.186858	0.221774	-0.0306717	0.148528	-0.174952	0.0540807	0.121567	0.234979	-0.316486	0.0184257	0.167246	-0.0084592	-0.053862	0.553847	0.398511	0.416988	0.265508	0.292629	0.354087	0.420222	0.410828	0.536436	0.218213	0.0801058	-0.136485	-0.296564	-0.0234704	-0.129656	-0.182872	-0.330524	-0.193516	0.213339	0.134496
Chylomicrons & XXL-VLDL particles	0.185518	0.151127	0.112676	-0.0130735	0.00307612	-0.0692169	0.190193	0.109231	-0.0331293	0.120551	0.0841626	0.232181	0.0269156	-0.139778	-0.0453937	-0.149112	-0.0722328	-0.048879	-0.195475	0.181083	-0.101766	-0.157074	-0.042379	-0.108563	-0.194159	0.153527	0.134517	0.344305	0.138515	0.361408	0.233108	0.229445	0.186388	0.0725264	0.302532	0.317174	0.382712	0.360054	0.213534	0.248285	0.0622289	-0.0683811	0.108062	0.0986496	0.106709	0.110154	0.147375	0.12585	0.0549429
XL-VLDL particles	0.222923	0.217447	-0.114338	0.179707	0.17054	0.131974	0.368606	-0.0763173	0.0819773	0.158571	0.150576	0.0515377	0.128857	-0.171774	-0.156493	-0.177082	-0.111826	-0.172556	-0.341665	0.0930183	-0.311481	-0.242379	-0.244672	-0.0731347	-0.421356	0.0170107	0.0794549	0.215971	-0.0435879	0.4735	0.233477	0.225938	0.183988	0.193209	0.246793	0.296195	0.43836	0.48765	-0.0255218	0.119882	-0.0402043	-0.261005	-0.00212249	-0.155249	0.0353441	-0.0171337	-0.03073	0.104316	-0.157292
L-VLDL particles	0.219355	0.254483	-0.124981	0.240583	0.168971	0.174273	0.372789	-0.0771786	0.129595	0.0937279	0.191581	-0.0181536	0.12818	-0.133064	-0.0973426	-0.0929567	-0.140589	-0.168549	-0.316746	0.112988	-0.334	-0.233488	-0.235501	-0.0152364	-0.440076	0.0155957	0.00765942	0.0833923	-0.134086	0.495709	0.244398	0.248089	0.186357	0.238903	0.23775	0.29275	0.426578	0.51355	-0.0950681	0.0714	-0.0461718	-0.247839	-0.00649051	-0.169891	-0.0283921	-0.0647513	-0.0590913	0.0547882	-0.168089
M-VLDL particles	0.135624	0.30124	-0.208834	0.33422	0.188751	0.125206	0.325479	-0.106893	0.0980959	0.0315297	0.374271	-0.0807372	0.255345	0.0183229	0.0707526	0.0739715	-0.0936135	-0.0662918	-0.202458	0.165513	-0.447271	-0.178423	-0.0229899	-0.0090495	-0.373724	0.0779784	0.047956	-0.0638285	-0.228337	0.46827	0.179492	0.385731	0.101084	0.129914	0.23455	0.28063	0.280458	0.482789	-0.185149	0.0148583	-0.0888677	-0.163493	-0.0527546	-0.250854	-0.0144883	-0.14313	0.0543542	0.0684776	-0.0724163
S-VLDL particles	0.0258082	0.194254	-0.144852	0.241475	0.140579	0.215988	0.397521	-0.256083	0.0665969	0.0182411	0.273159	-0.0288303	0.232274	0.0107782	0.0270208	0.0266162	-0.115763	-0.113044	-0.291243	0.0683098	-0.431736	-0.258037	-0.189551	-0.0162522	-0.544514	-0.000953582	-0.0254391	-0.0192254	-0.220831	0.533483	0.219973	0.341245	0.156149	0.232072	0.236458	0.307392	0.410028	0.557722	-0.168924	0.10044	0.0259313	-0.278969	0.0692424	-0.20299	-0.0555846	-0.0935433	-0.135255	0.11456	-0.186486
XS-VLDL particles	-0.0235935	0.161032	-0.0954505	0.0883769	0.101758	0.124806	0.346273	-0.237503	-0.00569073	0.138454	0.304628	-0.0108614	0.263035	0.0149047	0.00846323	-0.041109	-0.0502061	-0.0895294	-0.209103	0.147851	-0.385898	-0.0924109	-0.0845426	0.0716572	-0.511539	-0.0907133	0.0715187	0.0266695	-0.0761328	0.423237	0.168171	0.396222	0.07992	0.189301	0.192654	0.271709	0.276798	0.43308	-0.14762	0.149199	0.0155957	-0.164601	0.0717032	-0.21837	-0.0275308	-0.0685041	-0.0739795	0.0637094	-0.0754618
IDL particles	-0.0910209	0.218432	-0.167861	0.261039	-0.0139348	0.126621	-0.0173183	0.00526008	0.0918207	0.0226706	0.249319	-0.0954447	0.226307	0.152373	0.151569	0.126527	0.0406387	0.0147007	0.146129	0.184836	-0.122716	0.177008	0.243533	0.101638	-0.091322	0.0660432	0.102833	-0.144545	-0.0429112	0.184226	0.0139963	0.297282	-0.088718	-0.0056618	0.111138	0.149343	0.00578328	0.177766	-0.133674	-0.0361153	-0.0770556	0.0283306	-0.00821311	-0.164416	-0.0306069	-0.106463	0.076871	0.0134125	0.112347
L-LDL particles	0.085361	0.314651	-0.275524	0.253564	0.119969	0.0527279	0.290104	-0.138946	0.00575225	0.0420499	0.426596	-0.104952	0.3603	0.154498	0.141474	0.130189	-0.0295945	-0.00573235	-0.171294	0.190314	-0.46053	-0.0813363	0.0252058	0.0550357	-0.34432	0.0589068	0.129964	-0.144975	-0.199729	0.297118	0.0979436	0.376133	0.0186726	0.0338785	0.144914	0.170691	0.0905945	0.3045	-0.210917	0.0161504	-0.0620444	-0.0521394	-0.039343	-0.270171	-0.0650589	-0.190378	0.0687502	0.0517735	-0.0430991
M-LDL particles	0.0659202	0.206189	-0.311022	0.331236	0.220958	0.13668	0.275155	-0.233382	0.0901596	-3.07607e-05	0.353077	-0.193289	0.310591	0.0959259	0.0618278	0.117973	-0.0849074	-0.0865091	-0.16588	-0.0362473	-0.463761	-0.102224	-0.128799	-0.0272716	-0.295149	-0.0358362	-0.015165	-0.185887	-0.301363	0.199914	0.0132581	0.277223	-0.0572483	-0.0345862	0.0805623	0.115568	0.0627547	0.209388	-0.310818	-0.101424	-0.0515857	-0.111877	-0.0404503	-0.272386	-0.112553	-0.153711	-0.071211	0.128618	-0.213096
S-LDL particles	0.0686271	0.217201	-0.309299	0.314779	0.178722	0.0676172	0.108801	-0.105109	0.0920668	-0.00747485	0.286694	-0.209351	0.263712	0.0894898	0.0682598	0.122435	-0.0586046	-0.0547347	-0.0453154	0.0727407	-0.337968	0.00747531	0.0538278	-0.0283182	-0.118632	-0.00852072	0.0595835	-0.198622	-0.220585	0.169522	-0.0215021	0.271501	-0.0961317	-0.09902	0.117352	0.11809	-0.0298085	0.171799	-0.221692	-0.142092	-0.0326371	0.0414347	-0.0184257	-0.170691	-0.0860377	-0.188717	0.00298379	0.0127357	-0.0841985
XL-HDL particles	-0.108616	-0.0229783	0.079824	0.0112894	-0.144301	-0.0178733	-0.313175	0.217632	0.142637	0.180965	-0.163465	0.109937	-0.128118	-0.110523	-0.0950036	-0.136989	0.0243647	-0.113414	0.294658	0.276132	0.425583	0.345587	0.168347	0.080953	0.251613	0.0874527	0.0499862	-0.00366052	0.261128	0.0980959	0.0971746	0.121952	0.0888718	0.130621	0.151927	0.147682	0.0528186	0.0723184	0.0955914	0.0203648	0.00925897	0.286351	0.0803162	0.198499	0.0389123	-0.0613061	-0.0331293	-0.0779832	0.207805
L-HDL particles	-0.183795	-0.0461718	0.118829	0.0453727	-0.129689	0.0451602	-0.274662	0.181519	0.231782	0.138331	-0.227694	0.0853218	-0.089852	0.0658701	0.0586271	-0.00747715	0.0782932	-0.00212652	0.289613	0.243177	0.421153	0.320239	0.206663	0.131218	0.25266	0.168292	0.0431573	-0.0213172	0.232274	0.227352	0.187151	0.181021	0.161071	0.172716	0.231536	0.241379	0.162978	0.195607	0.23099	-0.00261482	-0.00827463	0.177336	0.108493	0.235658	-0.0310376	-0.151435	-0.0748408	0.00793675	0.226109
M-HDL particles	-0.153588	0.0135655	0.229752	-0.0120584	0.068782	0.101334	0.109416	-0.0376204	0.182688	0.0242087	-0.0984973	0.0210151	0.0536774	0.311089	0.30206	0.158713	0.234172	0.268064	0.104813	0.11985	0.0597121	0.145476	0.195553	0.225499	-0.0755885	0.0870221	0.135501	-0.00661355	0.0282691	0.414993	0.361475	0.323586	0.25794	0.252196	0.311268	0.357409	0.340137	0.388046	0.366911	0.0507583	-0.156357	-0.214925	-0.0462334	-0.0156572	-0.173029	-0.347688	-0.172783	0.19765	0.1943
S-HDL particles	-0.0467255	0.121351	0.00439878	0.148515	0.21579	0.095304	0.339998	-0.174259	0.11889	-0.0665969	0.142947	-0.106398	0.28469	0.423737	0.399157	0.356503	0.125946	0.258418	-0.109366	-0.0184313	-0.381407	-0.0841357	0.0752789	0.147347	-0.291701	0.0991418	0.0713341	-0.111569	-0.283029	0.415793	0.282111	0.363919	0.16993	0.139422	0.260636	0.310468	0.289902	0.404903	0.0993474	-0.00904421	-0.106955	-0.310529	-0.0313452	-0.131748	-0.199114	-0.31219	-0.109231	0.289815	0.0325473
Creatinine	-0.409025	-0.150758	0.0595835	-0.0945599	-0.123998	0.314522	0.0107355	-0.0486327	0.0271617	-0.0247009	-0.123814	0.113167	0.245993	0.149447	0.254359	0.0661867	0.262659	0.215826	0.126409	-0.0393243	0.0731557	0.279694	0.045272	0.202629	-0.184984	-0.0665354	0.104802	0.141407	0.0813006	0.27417	0.240583	0.193881	0.211859	0.162377	0.264204	0.323941	0.358748	0.257559	0.248569	0.0607561	-0.0776708	-0.208035	0.0299917	0.0358978	0.0381125	-0.0608139	-0.0781014	0.430676	0.179195
Albumin	-0.194808	0.119751	0.198991	0.110494	-0.306658	0.031686	-0.367867	0.351564	0.128857	-0.204405	-0.0813018	0.0642144	0.108739	0.510486	0.435656	0.388535	0.29693	0.354296	0.454015	0.26247	0.184827	0.266466	0.496669	0.198966	0.290993	0.349842	0.131748	-0.100003	0.157033	-0.119874	0.0575234	0.047778	0.086257	0.0678801	-0.0500477	-0.0794549	-0.126002	-0.138946	0.250169	-0.0744455	-0.14356	0.104433	-0.167184	0.0887447	0.0873297	-0.0207635	0.315943	0.119851	0.516389
[truncated: 54 more columns]

## Sheet: P values - Baseline & Post-ex
	Leptin	Insulin	Adiponectin	TNF-a	IL-6	IL-10	CRP	CD14	MCP-1	ICAM	LBP	N-Acetylglycoproteins	LDLox	Isoleucine	Leucine	Valine	Alanine	Phenylalanine	Glutamine	Glutamate	Glycine	Methionine	Tyrosine	Tryptophan	Betaine	Glucose	Lactate	Pyruvate	Citrate	Total FA	PUFA	Omega-3 FA	ARA & EPA	DHA	Linoleic acid	MUFA	Oleic acid	SFA	Choline	Lysophosphatidylcholine	3-Hydroxybutyrate	Acetate	Acetoacetate	Acetone	C0	C2:0	C3:0	C5-DC	C5-OH
Leptin		0.00271823	0.929328	0.865679	0.00453325	0.213523	0.0142547	0.860815	0.685978	0.94391	0.0750152	0.318649	0.423423	0.126143	0.0993366	0.47516	0.311568	0.35875	0.241958	0.204172	0.0178751	0.0607353	0.917272	0.796363	0.47731	0.612607	0.676882	0.811397	0.234297	0.28736	0.223798	0.612557	0.495185	0.327376	0.436386	0.510045	0.676867	0.300194	0.848818	0.357696	0.662822	0.492147	0.409105	0.0532276	0.11799	0.220969	0.235401	0.0456995	0.462793
Insulin	0.00271823		0.0110043	0.0342604	0.607124	0.139973	0.206324	0.518072	0.182486	0.9337	0.0392732	0.488117	0.0361012	0.239701	0.438075	0.177998	0.136824	0.755264	0.593331	1.22467e-06	0.118793	0.377654	0.311254	0.0206951	0.163838	0.0155637	0.0445969	0.989578	0.697496	0.274278	0.207496	0.398746	0.312592	0.0246534	0.530985	0.615838	0.776369	0.232464	0.189536	0.144468	0.332489	0.376558	0.210558	0.000918329	0.610671	0.918406	0.302151	0.256745	0.909126
Adiponectin	0.929328	0.0110043		2.0798e-05	0.0890144	0.000226583	0.75153	0.114032	0.00130771	0.249317	0.154263	0.0228825	0.0640607	0.894134	0.854806	0.528141	0.0707488	0.756138	0.519968	0.0462236	0.812625	0.592076	0.973661	0.482751	0.845746	0.415964	0.569713	0.811397	0.866583	0.563168	0.770931	0.929318	0.391714	0.953202	0.69139	0.657829	0.822434	0.57441	0.0595153	0.00706738	0.171195	0.874886	0.241727	0.0187399	0.366392	0.643597	0.200498	0.581464	0.254786
TNF-a	0.865679	0.0342604	2.0798e-05		0.306843	1.30305e-05	0.621993	0.395579	9.9778e-12	0.183947	0.498258	0.0745466	0.00373815	0.836473	0.989939	0.590627	0.36714	0.179989	0.395914	0.403787	0.845872	0.449326	0.93321	0.78575	0.695182	0.0738101	0.239754	0.111498	0.909859	0.202807	0.884104	0.235882	0.926227	0.0540554	0.472155	0.680409	0.88754	0.167179	0.11604	0.00520649	0.917131	0.944274	0.860633	0.858112	0.995977	0.695284	0.146837	0.829484	0.709741
IL-6	0.00453325	0.607124	0.0890144	0.306843		0.510154	0.25922	0.102911	0.0513797	0.0286334	0.165803	0.205693	0.444043	0.0880716	0.085075	0.399435	0.489198	0.877274	0.231129	0.86077	0.31034	0.39138	0.722486	0.76833	0.701732	0.595436	0.461556	0.215799	0.671675	0.114461	0.179867	0.292695	0.472206	0.631826	0.164591	0.17163	0.165251	0.15563	0.66197	0.410054	0.136171	0.00114443	0.041065	0.0737329	0.182402	0.999817	0.679399	0.569996	0.4142
IL-10	0.213523	0.139973	0.000226583	1.30305e-05	0.510154		0.0408843	0.00272524	7.91159e-08	0.428223	0.751334	0.0142939	0.004398	0.260877	0.349156	0.235496	0.0285901	0.438959	0.0929442	0.595539	0.121048	0.167632	0.993688	0.126028	0.630777	0.199065	0.820645	0.556938	0.583985	0.0229089	0.429025	0.335578	0.409179	0.142073	0.807472	0.680727	0.405904	0.0195665	0.789674	0.00586064	0.860984	0.316153	0.860624	0.518637	0.874696	0.932237	0.676018	0.10855	0.690667
CRP	0.0142547	0.206324	0.75153	0.621993	0.25922	0.0408843		0.0591173	0.158328	0.251819	0.000171486	0.738265	0.380571	0.479098	0.406914	0.251575	0.0130964	0.330061	2.76701e-06	0.938603	2.18626e-10	0.00842995	0.0171448	0.471164	7.78027e-07	0.0583455	0.776027	0.519266	0.0149789	0.0441363	0.0210114	0.104583	0.0739169	0.0275496	0.310503	0.138237	0.0393595	0.0396481	0.240488	0.0228521	0.316302	0.452343	0.200004	0.12622	0.0491448	0.3992	0.15722	0.220676	0.20503
CD14	0.860815	0.518072	0.114032	0.395579	0.102911	0.00272524	0.0591173		0.915859	0.118772	0.194137	0.0310212	0.419951	0.872398	0.456445	0.766481	0.235727	0.552817	0.0516466	0.79767	0.114923	0.455098	0.0273822	0.239547	0.0205886	0.297167	0.160983	0.637348	0.462968	0.0132433	0.222023	0.417757	0.2096	0.659056	0.29309	0.395329	0.408428	0.0094123	0.629532	0.235096	0.35906	0.642279	0.64987	0.180797	0.0193707	0.226846	0.00072889	0.262063	0.00468532
MCP-1	0.685978	0.182486	0.00130771	9.9778e-12	0.0513797	7.91159e-08	0.158328	0.915859		0.559135	0.312273	0.00894189	0.00935739	0.713912	0.793211	0.221002	0.42566	0.626715	0.0939237	0.398407	0.388119	0.880482	0.672361	0.53329	0.0284446	0.0140007	0.741797	0.656168	0.777434	0.0681629	0.866941	0.347212	0.673845	0.0265318	0.711818	0.877054	0.902954	0.0596364	0.75011	6.52349e-05	0.972395	0.911859	0.571277	0.625251	0.385115	0.312948	0.18983	0.714541	0.556938
ICAM	0.94391	0.9337	0.249317	0.183947	0.0286334	0.428223	0.251819	0.118772	0.559135		0.297375	0.0928026	0.991406	0.138798	0.0889973	0.0152358	0.183835	0.0201416	0.118788	0.821853	0.82314	0.665472	0.0623863	0.0561316	0.362505	0.506794	0.626555	0.545278	0.324674	0.37481	0.488804	0.2957	0.372921	0.509464	0.462968	0.244366	0.151476	0.492438	0.982067	0.929141	0.903866	0.247787	0.932607	0.785889	0.959972	0.645245	0.704986	0.595738	0.190192
LBP	0.0750152	0.0392732	0.154263	0.498258	0.165803	0.751334	0.000171486	0.194137	0.312273	0.297375		0.542109	0.603751	0.638366	0.349783	0.389538	0.531923	0.891598	0.0437412	0.397948	0.000252125	0.0569007	0.995243	0.651558	0.0571783	0.788886	0.316968	0.956685	0.0603521	0.78007	0.473429	0.879296	0.805877	0.623181	0.668996	0.915858	0.937615	0.737288	0.316338	0.553233	0.884287	0.837816	0.660485	0.0473326	0.357597	0.312273	0.628996	0.339679	0.445246
N-Acetylglycoproteins	0.318649	0.488117	0.0228825	0.0745466	0.205693	0.0142939	0.738265	0.0310212	0.00894189	0.0928026	0.542109		0.783365	0.63927	0.78803	0.0312152	0.376138	0.605547	0.442026	0.229556	0.620982	0.995062	0.786876	0.0773207	0.841574	0.472757	0.341117	0.0664384	0.079056	0.586446	0.0225871	0.0715787	0.0646859	0.969179	0.0033331	0.00188317	0.000898641	0.849801	0.0170707	3.0846e-08	0.108401	0.0950448	0.171449	0.410822	0.44448	0.188133	0.95357	0.295288	0.290104
LDLox	0.423423	0.0361012	0.0640607	0.00373815	0.444043	0.004398	0.380571	0.419951	0.00935739	0.991406	0.603751	0.783365		0.00645373	0.0330346	0.0688395	0.326114	0.769809	0.330126	0.335824	0.0601675	0.686635	0.755418	0.808609	0.594139	0.669838	0.179576	0.915132	0.775676	0.304992	0.822796	0.229216	0.814948	0.0151925	0.446253	0.643267	0.932239	0.236694	0.83231	0.242168	0.778489	0.696817	0.412526	0.195921	0.241915	0.159303	0.103067	0.0489359	0.269767
Isoleucine	0.126143	0.239701	0.894134	0.836473	0.0880716	0.260877	0.479098	0.872398	0.713912	0.138798	0.638366	0.63927	0.00645373		8.88178e-16	8.84404e-12	0.000705562	0.00032499	0.000916367	0.283938	0.619386	0.150974	0.00110486	0.0678458	0.468976	0.0153377	0.461344	0.340234	0.735626	0.792552	0.906758	0.866057	0.754043	0.952236	0.552051	0.783362	0.537485	0.76017	0.331948	0.526202	0.206234	0.836386	0.596949	0.68227	0.709972	0.542689	0.0662013	0.0131253	0.008383
Leucine	0.0993366	0.438075	0.854806	0.989939	0.085075	0.349156	0.406914	0.456445	0.793211	0.0889973	0.349783	0.78803	0.0330346	8.88178e-16		0	0.00106693	6.87631e-07	0.000220472	0.372255	0.985913	0.100862	3.30079e-05	0.038737	0.144986	0.0392483	0.632761	0.167993	0.132241	0.580045	0.679928	0.696724	0.445945	0.741772	0.467552	0.633907	0.29353	0.56781	0.218467	0.435661	0.191604	0.923647	0.659006	0.759617	0.837742	0.275582	0.0564546	0.0614881	0.00145146
Valine	0.47516	0.177998	0.528141	0.590627	0.399435	0.235496	0.251575	0.766481	0.221002	0.0152358	0.389538	0.0312152	0.0688395	8.84404e-12	0		0.000880986	6.86994e-06	6.00076e-05	0.145608	0.907461	0.756324	8.43505e-06	0.0154439	0.052788	0.00794979	0.945536	0.090043	0.00944413	0.672423	0.552057	0.344273	0.602346	0.643717	0.0768631	0.0993953	0.0339091	0.775257	0.865259	0.0301189	0.215317	0.727021	0.520034	0.644978	0.258489	0.589601	0.0037395	0.317245	0.000415331
Alanine	0.311568	0.136824	0.0707488	0.36714	0.489198	0.0285901	0.0130964	0.235727	0.42566	0.183835	0.531923	0.376138	0.326114	0.000705562	0.00106693	0.000880986		4.40994e-09	1.21338e-07	0.00180985	0.00606849	0.0107303	0.000240876	0.0849097	0.0875032	0.137386	1.99286e-06	0.00451903	0.396444	0.839775	0.311338	0.621675	0.327925	0.648742	0.964535	0.755168	0.600822	0.763904	0.0249573	0.135002	4.27163e-05	0.325199	5.36043e-06	0.00269485	0.00556922	0.758135	0.0201658	0.00013534	0.00199285
Phenylalanine	0.35875	0.755264	0.756138	0.179989	0.877274	0.438959	0.330061	0.552817	0.626715	0.0201416	0.891598	0.605547	0.769809	0.00032499	6.87631e-07	6.86994e-06	4.40994e-09		0.000163995	0.028608	0.093524	0.0949654	2.09928e-05	0.0708796	0.092821	0.231659	0.015848	0.49804	0.190486	0.807662	0.0404775	0.639788	0.0922867	0.57136	0.221673	0.364862	0.580436	0.947094	0.0426006	0.869216	0.0288919	0.844701	0.0246212	0.249561	0.126015	0.670422	0.00636479	0.112904	1.26826e-05
Glutamine	0.241958	0.593331	0.519968	0.395914	0.231129	0.0929442	2.76701e-06	0.0516466	0.0939237	0.118788	0.0437412	0.442026	0.330126	0.000916367	0.000220472	6.00076e-05	1.21338e-07	0.000163995		0.0501269	1.81886e-05	0.0026303	2.25983e-08	0.220396	1.42959e-06	0.14322	0.21515	0.681055	0.570922	0.283947	0.390271	0.209338	0.475228	0.873116	0.324393	0.226346	0.0689566	0.298842	0.30404	0.0268583	0.0254497	0.183287	0.0535284	0.709907	0.00141807	0.0676985	0.00131681	0.0880055	5.74035e-07
Glutamate	0.204172	1.22467e-06	0.0462236	0.403787	0.86077	0.595539	0.938603	0.79767	0.398407	0.821853	0.397948	0.229556	0.335824	0.283938	0.372255	0.145608	0.00180985	0.028608	0.0501269		0.15039	0.41652	0.00559344	0.101658	0.961843	0.00311655	0.0977461	0.397503	0.880453	0.0580103	0.000222751	0.109777	9.56453e-05	0.0302319	0.0464624	0.0882491	0.111775	0.0753587	0.953803	0.629691	0.609433	0.00350417	0.450537	0.297879	0.0484916	0.537222	0.00498616	0.364801	0.0120783
Glycine	0.0178751	0.118793	0.812625	0.845872	0.31034	0.121048	2.18626e-10	0.114923	0.388119	0.82314	0.000252125	0.620982	0.0601675	0.619386	0.985913	0.907461	0.00606849	0.093524	1.81886e-05	0.15039		0.000974347	0.0634839	0.96305	7.69086e-05	0.0328447	0.892247	0.336279	0.0844701	0.49677	0.542559	0.607931	0.398552	0.460603	0.235634	0.452857	0.648667	0.371038	0.0184771	0.651226	0.616453	0.253807	0.467158	0.0317428	0.228153	0.829034	0.396573	0.499963	0.274758
Methionine	0.0607353	0.377654	0.592076	0.449326	0.39138	0.167632	0.00842995	0.455098	0.880482	0.665472	0.0569007	0.995062	0.686635	0.150974	0.100862	0.756324	0.0107303	0.0949654	0.0026303	0.41652	0.000974347		0.0353072	0.199311	0.0211464	0.558491	0.369073	0.860266	0.116637	0.997989	0.47014	0.847834	0.801254	0.188945	0.114771	0.141954	0.582315	0.753432	0.0411932	0.856206	0.253628	0.414743	0.474698	0.254599	0.912217	0.547398	0.616626	0.0638891	0.13768
Tyrosine	0.917272	0.311254	0.973661	0.93321	0.722486	0.993688	0.0171448	0.0273822	0.672361	0.0623863	0.995243	0.786876	0.755418	0.00110486	3.30079e-05	8.43505e-06	0.000240876	2.09928e-05	2.25983e-08	0.00559344	0.0634839	0.0353072		0.110524	9.10208e-05	0.0443566	0.789314	0.970004	0.590161	0.9437	0.794794	0.967624	0.969637	0.525139	0.984268	0.853002	0.270396	0.907815	0.316322	0.460183	0.0469241	0.653514	0.0844664	0.300923	0.0146002	0.572177	0.000192457	0.657729	5.95748e-08
Tryptophan	0.796363	0.0206951	0.482751	0.78575	0.76833	0.126028	0.471164	0.239547	0.53329	0.0561316	0.651558	0.0773207	0.808609	0.0678458	0.038737	0.0154439	0.0849097	0.0708796	0.220396	0.101658	0.96305	0.199311	0.110524		0.128826	0.896723	0.886207	0.188986	0.460569	0.287784	0.0126586	0.0953394	0.0238476	0.00361691	0.603843	0.433097	0.485976	0.388618	0.326182	0.736593	0.167847	0.843815	0.196521	0.395794	0.456927	0.320381	0.532079	0.137796	0.0763789
Betaine	0.47731	0.163838	0.845746	0.695182	0.701732	0.630777	7.78027e-07	0.0205886	0.0284446	0.362505	0.0571783	0.841574	0.594139	0.468976	0.144986	0.052788	0.0875032	0.092821	1.42959e-06	0.961843	7.69086e-05	0.0211464	9.10208e-05	0.128826		0.0164935	0.7433	0.727545	0.843231	0.0915632	0.024913	0.029647	0.0470566	0.0121183	0.54444	0.207747	0.0200227	0.0853215	0.203167	0.0236655	0.48104	0.0842859	0.697736	0.209443	0.000574127	0.137234	0.00451861	0.565891	0.00206783
Glucose	0.612607	0.0155637	0.415964	0.0738101	0.595436	0.199065	0.0583455	0.297167	0.0140007	0.506794	0.788886	0.472757	0.669838	0.0153377	0.0392483	0.00794979	0.137386	0.231659	0.14322	0.00311655	0.0328447	0.558491	0.0443566	0.896723	0.0164935		0.355911	0.349903	0.307629	0.225949	0.320916	0.248485	0.190921	0.716013	0.686654	0.695459	0.827076	0.250855	0.607313	0.604216	0.793661	0.193661	0.779897	0.144753	0.0851464	0.770408	0.00757996	0.0445576	0.093934
Lactate	0.676882	0.0445969	0.569713	0.239754	0.461556	0.820645	0.776027	0.160983	0.741797	0.626555	0.316968	0.341117	0.179576	0.461344	0.632761	0.945536	1.99286e-06	0.015848	0.21515	0.0977461	0.892247	0.369073	0.789314	0.886207	0.7433	0.355911		1.55029e-08	0.020904	0.555114	0.97404	0.218882	0.553708	0.116098	0.677218	0.57441	0.562684	0.520462	0.0234709	0.919856	0.286517	0.377809	0.109544	0.129297	0.366638	0.772163	0.800743	0.0076907	0.638471
Pyruvate	0.811397	0.989578	0.811397	0.111498	0.215799	0.556938	0.519266	0.637348	0.656168	0.545278	0.956685	0.0664384	0.915132	0.340234	0.167993	0.090043	0.00451903	0.49804	0.681055	0.397503	0.336279	0.860266	0.970004	0.188986	0.727545	0.349903	1.55029e-08		8.39474e-05	0.474013	0.974222	0.288242	0.708899	0.0145291	0.811397	0.859734	0.515519	0.395844	0.00648446	0.337929	0.997989	0.88067	0.630471	0.580384	0.155568	0.120687	0.414375	0.000625569	0.977511
Citrate	0.234297	0.697496	0.866583	0.909859	0.671675	0.583985	0.0149789	0.462968	0.777434	0.324674	0.0603521	0.079056	0.775676	0.735626	0.132241	0.00944413	0.396444	0.190486	0.570922	0.880453	0.0844701	0.116637	0.590161	0.460569	0.843231	0.307629	0.020904	8.39474e-05		0.53401	0.84158	0.61676	0.841934	0.138045	0.615191	0.713188	0.92896	0.469181	0.0413268	0.415273	0.328567	0.989578	0.707375	0.0994043	0.570338	0.130015	0.286517	0.000908891	0.241597
Total FA	0.28736	0.274278	0.563168	0.202807	0.114461	0.0229089	0.0441363	0.0132433	0.0681629	0.37481	0.78007	0.586446	0.304992	0.792552	0.580045	0.672423	0.839775	0.807662	0.283947	0.0580103	0.49677	0.997989	0.9437	0.287784	0.0915632	0.225949	0.555114	0.474013	0.53401		4.38109e-09	3.76856e-11	5.98864e-08	2.1823e-05	6.15104e-08	6.6966e-09	2.50709e-09	0	0.80733	0.365871	0.63702	0.801453	0.342069	0.883565	0.885737	0.109333	0.262788	0.156849	0.610805
PUFA	0.223798	0.207496	0.770931	0.884104	0.179867	0.429025	0.0210114	0.222023	0.866941	0.488804	0.473429	0.0225871	0.822796	0.906758	0.679928	0.552057	0.311338	0.0404775	0.390271	0.000222751	0.542559	0.47014	0.794794	0.0126586	0.024913	0.320916	0.97404	0.974222	0.84158	4.38109e-09		1.00266e-11	0	9.11996e-05	1.35092e-12	2.34701e-13	4.88498e-15	2.28994e-07	0.166675	0.000972094	0.897876	0.707541	0.858652	0.908405	0.875246	0.445832	0.907497	0.0828541	0.173297
Omega-3 FA	0.612557	0.398746	0.929318	0.235882	0.292695	0.335578	0.104583	0.417757	0.347212	0.2957	0.879296	0.0715787	0.229216	0.866057	0.696724	0.344273	0.621675	0.639788	0.209338	0.109777	0.607931	0.847834	0.967624	0.0953394	0.029647	0.248485	0.218882	0.288242	0.61676	3.76856e-11	1.00266e-11		4.3435e-08	0.000408087	1.51257e-11	4.61853e-14	6.24167e-13	2.55885e-09	0.56926	0.00126546	0.647015	0.572162	0.879207	0.778636	0.93916	0.0900085	0.869271	0.122405	0.401431
ARA & EPA	0.495185	0.312592	0.391714	0.926227	0.472206	0.409179	0.0739169	0.2096	0.673845	0.372921	0.805877	0.0646859	0.814948	0.754043	0.445945	0.602346	0.327925	0.0922867	0.475228	9.56453e-05	0.398552	0.801254	0.969637	0.0238476	0.0470566	0.190921	0.553708	0.708899	0.841934	5.98864e-08	0	4.3435e-08		7.47326e-06	4.90947e-08	1.20481e-07	3.92646e-09	7.86122e-07	0.712947	0.0405441	0.716259	0.494019	0.888629	0.948104	0.987018	0.681916	0.771099	0.0799642	0.240638
DHA	0.327376	0.0246534	0.953202	0.0540554	0.631826	0.142073	0.0275496	0.659056	0.0265318	0.509464	0.623181	0.969179	0.0151925	0.952236	0.741772	0.643717	0.648742	0.57136	0.873116	0.0302319	0.460603	0.188945	0.525139	0.00361691	0.0121183	0.716013	0.116098	0.0145291	0.138045	2.1823e-05	9.11996e-05	0.000408087	7.47326e-06		0.185754	0.0661375	0.0117131	1.61646e-05	0.0959724	0.854909	0.912558	0.7119	0.925115	0.274632	0.429322	0.731849	0.454422	0.873393	0.0638648
Linoleic acid	0.436386	0.530985	0.69139	0.472155	0.164591	0.807472	0.310503	0.29309	0.711818	0.462968	0.668996	0.0033331	0.446253	0.552051	0.467552	0.0768631	0.964535	0.221673	0.324393	0.0464624	0.235634	0.114771	0.984268	0.603843	0.54444	0.686654	0.677218	0.811397	0.615191	6.15104e-08	1.35092e-12	1.51257e-11	4.90947e-08	0.185754		0	0	3.97173e-06	0.0670988	0.00036874	0.483179	0.475439	0.336674	0.148824	0.94391	0.521659	0.554806	0.285962	0.531255
MUFA	0.510045	0.615838	0.657829	0.680409	0.17163	0.680727	0.138237	0.395329	0.877054	0.244366	0.915858	0.00188317	0.643267	0.783362	0.633907	0.0993953	0.755168	0.364862	0.226346	0.0882491	0.452857	0.141954	0.853002	0.433097	0.207747	0.695459	0.57441	0.859734	0.713188	6.6966e-09	2.34701e-13	4.61853e-14	1.20481e-07	0.0661375	0		0	7.71918e-07	0.0497321	4.98777e-05	0.519864	0.759554	0.278387	0.211071	0.872719	0.412263	0.456521	0.212928	0.607102
Oleic acid	0.676867	0.776369	0.822434	0.88754	0.165251	0.405904	0.0393595	0.408428	0.902954	0.151476	0.937615	0.000898641	0.932239	0.537485	0.29353	0.0339091	0.600822	0.580436	0.0689566	0.111775	0.648667	0.582315	0.270396	0.485976	0.0200227	0.827076	0.562684	0.515519	0.92896	2.50709e-09	4.88498e-15	6.24167e-13	3.92646e-09	0.0117131	0	0		1.59018e-07	0.0922502	1.30523e-05	0.577218	0.614367	0.415545	0.375162	0.824933	0.442929	0.340046	0.160025	0.965539
SFA	0.300194	0.232464	0.57441	0.167179	0.15563	0.0195665	0.0396481	0.0094123	0.0596364	0.492438	0.737288	0.849801	0.236694	0.76017	0.56781	0.775257	0.763904	0.947094	0.298842	0.0753587	0.371038	0.753432	0.907815	0.388618	0.0853215	0.250855	0.520462	0.395844	0.469181	0	2.28994e-07	2.55885e-09	7.86122e-07	1.61646e-05	3.97173e-06	7.71918e-07	1.59018e-07		0.987922	0.623115	0.564723	0.773919	0.296521	0.803936	0.843197	0.12343	0.219737	0.221736	0.690182
Choline	0.848818	0.189536	0.0595153	0.11604	0.66197	0.789674	0.240488	0.629532	0.75011	0.982067	0.316338	0.0170707	0.83231	0.331948	0.218467	0.865259	0.0249573	0.0426006	0.30404	0.953803	0.0184771	0.0411932	0.316322	0.326182	0.203167	0.607313	0.0234709	0.00648446	0.0413268	0.80733	0.166675	0.56926	0.712947	0.0959724	0.0670988	0.0497321	0.0922502	0.987922		0.117377	0.900154	0.550161	0.855655	0.283386	0.964692	0.891624	0.893438	0.146345	0.357104
Lysophosphatidylcholine	0.357696	0.144468	0.00706738	0.00520649	0.410054	0.00586064	0.0228521	0.235096	6.52349e-05	0.929141	0.553233	3.0846e-08	0.242168	0.526202	0.435661	0.0301189	0.135002	0.869216	0.0268583	0.629691	0.651226	0.856206	0.460183	0.736593	0.0236655	0.604216	0.919856	0.337929	0.415273	0.365871	0.000972094	0.00126546	0.0405441	0.854909	0.00036874	4.98777e-05	1.30523e-05	0.623115	0.117377		0.632575	0.676023	0.730017	0.9015	0.970566	0.750819	0.565789	0.98656	0.763893
3-Hydroxybutyrate	0.662822	0.332489	0.171195	0.917131	0.136171	0.860984	0.316302	0.35906	0.972395	0.903866	0.884287	0.108401	0.778489	0.206234	0.191604	0.215317	4.27163e-05	0.0288919	0.0254497	0.609433	0.616453	0.253628	0.0469241	0.167847	0.48104	0.793661	0.286517	0.997989	0.328567	0.63702	0.897876	0.647015	0.716259	0.912558	0.483179	0.519864	0.577218	0.564723	0.900154	0.632575		0.000496124	0	1.48115e-08	0.00141733	0.00296807	0.00471124	0.220236	0.0340222
Acetate	0.492147	0.376558	0.874886	0.944274	0.00114443	0.316153	0.452343	0.642279	0.911859	0.247787	0.837816	0.0950448	0.696817	0.836386	0.923647	0.727021	0.325199	0.844701	0.183287	0.00350417	0.253807	0.414743	0.653514	0.843815	0.0842859	0.193661	0.377809	0.88067	0.989578	0.801453	0.707541	0.572162	0.494019	0.7119	0.475439	0.759554	0.614367	0.773919	0.550161	0.676023	0.000496124		0.000215817	0.0010134	0.629491	0.22919	0.688006	0.239173	0.344749
Acetoacetate	0.409105	0.210558	0.241727	0.860633	0.041065	0.860624	0.200004	0.64987	0.571277	0.932607	0.660485	0.171449	0.412526	0.596949	0.659006	0.520034	5.36043e-06	0.0246212	0.0535284	0.450537	0.467158	0.474698	0.0844664	0.196521	0.697736	0.779897	0.109544	0.630471	0.707375	0.342069	0.858652	0.879207	0.888629	0.925115	0.336674	0.278387	0.415545	0.296521	0.855655	0.730017	0	0.000215817		3.91898e-10	0.00561323	0.0187399	0.010647	0.23482	0.13155
Acetone	0.0532276	0.000918329	0.0187399	0.858112	0.0737329	0.518637	0.12622	0.180797	0.625251	0.785889	0.0473326	0.410822	0.195921	0.68227	0.759617	0.644978	0.00269485	0.249561	0.709907	0.297879	0.0317428	0.254599	0.300923	0.395794	0.209443	0.144753	0.129297	0.580384	0.0994043	0.883565	0.908405	0.778636	0.948104	0.274632	0.148824	0.211071	0.375162	0.803936	0.283386	0.9015	1.48115e-08	0.0010134	3.91898e-10		0.034951	0.190306	0.205988	0.868379	0.793115
C0	0.11799	0.610671	0.366392	0.995977	0.182402	0.874696	0.0491448	0.0193707	0.385115	0.959972	0.357597	0.44448	0.241915	0.709972	0.837742	0.258489	0.00556922	0.126015	0.00141807	0.0484916	0.228153	0.912217	0.0146002	0.456927	0.000574127	0.0851464	0.366638	0.155568	0.570338	0.885737	0.875246	0.93916	0.987018	0.429322	0.94391	0.872719	0.824933	0.843197	0.964692	0.970566	0.00141733	0.629491	0.00561323	0.034951		0.00262723	1.24785e-11	0.623115	6.18947e-07
C2:0	0.220969	0.918406	0.643597	0.695284	0.999817	0.932237	0.3992	0.226846	0.312948	0.645245	0.312273	0.188133	0.159303	0.542689	0.275582	0.589601	0.758135	0.670422	0.0676985	0.537222	0.829034	0.547398	0.572177	0.320381	0.137234	0.770408	0.772163	0.120687	0.130015	0.109333	0.445832	0.0900085	0.681916	0.731849	0.521659	0.412263	0.442929	0.12343	0.891624	0.750819	0.00296807	0.22919	0.0187399	0.190306	0.00262723		0.00601072	0.754652	0.0344768
C3:0	0.235401	0.302151	0.200498	0.146837	0.679399	0.676018	0.15722	0.00072889	0.18983	0.704986	0.628996	0.95357	0.103067	0.0662013	0.0564546	0.0037395	0.0201658	0.00636479	0.00131681	0.00498616	0.396573	0.616626	0.000192457	0.532079	0.00451861	0.00757996	0.800743	0.414375	0.286517	0.262788	0.907497	0.869271	0.771099	0.454422	0.554806	0.456521	0.340046	0.219737	0.893438	0.565789	0.00471124	0.688006	0.010647	0.205988	1.24785e-11	0.00601072		0.859726	1.30447e-09
C5-DC	0.0456995	0.256745	0.581464	0.829484	0.569996	0.10855	0.220676	0.262063	0.714541	0.595738	0.339679	0.295288	0.0489359	0.0131253	0.0614881	0.317245	0.00013534	0.112904	0.0880055	0.364801	0.499963	0.0638891	0.657729	0.137796	0.565891	0.0445576	0.0076907	0.000625569	0.000908891	0.156849	0.0828541	0.122405	0.0799642	0.873393	0.285962	0.212928	0.160025	0.221736	0.146345	0.98656	0.220236	0.239173	0.23482	0.868379	0.623115	0.754652	0.859726		0.667453
C5-OH	0.462793	0.909126	0.254786	0.709741	0.4142	0.690667	0.20503	0.00468532	0.556938	0.190192	0.445246	0.290104	0.269767	0.008383	0.00145146	0.000415331	0.00199285	1.26826e-05	5.74035e-07	0.0120783	0.274758	0.13768	5.95748e-08	0.0763789	0.00206783	0.093934	0.638471	0.977511	0.241597	0.610805	0.173297	0.401431	0.240638	0.0638648	0.531255	0.607102	0.965539	0.690182	0.357104	0.763893	0.0340222	0.344749	0.13155	0.793115	6.18947e-07	0.0344768	1.30447e-09	0.667453
C4:0-iso	0.426091	0.509588	0.0689919	0.723646	0.592161	0.712473	0.65649	0.437326	0.668824	0.239001	0.777424	0.201809	0.0641903	0.809495	0.592069	0.37652	0.0120637	0.0519327	0.116002	0.0161794	0.0574395	0.933239	0.713811	0.288138	0.0676167	0.219195	0.0557004	0.241713	0.154121	0.863514	0.405744	0.679521	0.25396	0.289884	0.974039	0.88519	0.709574	0.802156	0.876316	0.812181	0.0296602	0.305196	0.0606114	0.0610747	1.52614e-05	0.332706	3.1076e-05	0.967733	0.0117822
C4:0	0.00332542	0.017135	0.124123	0.518065	0.386249	0.615326	0.757807	0.838177	0.494476	0.186523	0.66532	0.278467	0.0188147	0.881625	0.966715	0.290915	0.00546989	0.0671575	0.0418442	0.000984903	0.271787	0.620354	0.166749	0.6868	0.13103	0.0806584	0.0296838	0.00537247	0.904956	0.187307	0.0318926	0.851797	0.0175487	0.0405229	0.333416	0.507089	0.305737	0.177756	0.421698	0.938983	0.847864	0.111985	0.730724	0.286517	1.70283e-06	0.000105272	0.00013297	0.26565	0.00525179
C5-M-DC	0.740903	0.947006	0.896597	0.996434	0.203132	0.434261	0.224825	0.129913	0.727763	0.62978	0.916213	0.849066	0.923129	0.141421	0.0157773	0.0163637	0.978331	0.154009	0.0714065	0.817464	0.846577	0.947459	0.045877	0.220308	0.0272697	0.857558	0.989394	0.0110742	0.00293244	0.231866	0.149371	0.511423	0.1517	0.603601	0.355738	0.269045	0.129476	0.264029	0.027839	0.271546	0.336271	0.0846373	0.90204	0.552142	0.936245	0.377632	0.296038	0.005362	0.0766613
C5:1	0.831497	0.621068	0.363775	0.70284	0.921471	0.776201	0.00728947	0.000602518	0.673755	0.865816	0.285819	0.274856	0.566616	0.0189028	0.000541932	0.00716371	0.00314924	8.95864e-05	3.80967e-06	0.0893681	0.0689689	0.011455	1.29816e-08	0.309247	3.65929e-05	0.636741	0.910193	0.851408	0.427293	0.52843	0.593559	0.788614	0.73607	0.774916	0.302967	0.457486	0.805016	0.385841	0.0197304	0.412075	0.00800138	0.914739	0.0303664	0.691629	0.000274952	0.154605	6.1575e-07	0.308095	3.31157e-12
C4:0-2M	0.0276809	0.560977	0.634381	0.558801	0.750645	0.163618	0.422331	0.00772641	0.729849	0.816729	0.642259	0.102433	0.437319	0.0395159	0.0142404	0.00329279	0.0542407	0.0102806	0.000191805	0.00747515	0.220728	0.535785	0.000149761	0.976125	7.50478e-06	0.0208161	0.737281	0.300497	0.294565	0.982447	0.395944	0.853948	0.381408	0.494462	0.559271	0.64721	0.953852	0.877591	0.389528	0.873247	0.260685	0.0162948	0.645725	0.752216	6.96381e-08	0.0360491	5.16325e-09	0.608056	7.76599e-10
C5:0	0.0276809	0.560977	0.634381	0.558801	0.750645	0.163618	0.422331	0.00772641	0.729849	0.816729	0.642259	0.102433	0.437319	0.0395159	0.0142404	0.00329279	0.0542407	0.0102806	0.000191805	0.00747515	0.220728	0.535785	0.000149761	0.976125	7.50478e-06	0.0208161	0.737281	0.300497	0.294565	0.982447	0.395944	0.853948	0.381408	0.494462	0.559271	0.64721	0.953852	0.877591	0.389528	0.873247	0.260685	0.0162948	0.645725	0.752216	6.96381e-08	0.0360491	5.16325e-09	0.608056	7.76599e-10
C6:0	0.143866	0.479683	0.138697	0.0068104	0.816002	0.949922	0.124662	0.143866	0.0121979	0.235535	0.720014	0.171145	0.0264158	0.922497	0.328511	0.910641	0.0219143	0.155308	0.676564	0.966991	0.169058	0.0672675	0.80364	0.0563217	0.974287	0.603718	0.103281	0.5962	0.816361	0.337673	0.493985	0.515285	0.34667	0.030925	0.883552	0.632396	0.209168	0.284366	0.504696	0.768704	0.00060628	0.658293	0.000619016	0.417638	0.289527	6.23163e-06	0.260655	0.168344	0.66794
C8:1	0.796846	0.461001	0.0389534	0.0881667	0.405432	0.311353	0.615191	0.00703901	0.522858	0.501495	0.183947	0.439678	0.488376	0.912854	0.622808	0.279789	0.725871	0.956969	0.0597384	0.0138058	0.917852	0.500589	0.00393571	0.872818	0.0784813	0.957781	0.0344497	0.23688	0.185274	0.430418	0.868926	0.858454	0.445129	0.529794	0.461562	0.361007	0.375412	0.435842	0.0754372	0.712315	0.554497	0.141021	0.47202	0.0740854	0.00777592	0.0336275	2.55566e-05	0.112444	0.0268899
C8:0	0.0703241	0.11804	0.392882	0.0413991	0.127149	0.372526	0.746829	0.407918	0.0909564	0.810327	0.0111922	0.370577	0.16892	0.33223	0.939777	0.872046	0.105563	0.331268	0.923947	0.0794663	0.842283	0.801526	0.868048	0.0487401	0.944953	0.755012	0.0234541	0.339944	0.828511	0.609538	0.551404	0.769847	0.776981	0.457905	0.737462	0.512262	0.240854	0.53643	0.999268	0.688998	0.00574527	0.538254	0.00136626	0.110913	0.816022	0.00323756	0.542215	0.560809	0.661293
C10:1	0.377308	0.234297	0.0465322	0.13091	0.56643	0.714708	0.288415	0.302805	0.166969	0.249509	0.221315	0.198899	0.302369	0.131325	0.423737	0.772446	0.542184	0.741846	0.472541	0.274026	0.77759	0.134977	0.300597	0.0132452	0.0526422	0.387654	0.220793	0.440209	0.918042	0.728308	0.400488	0.795579	0.558962	0.231399	0.389692	0.375808	0.516412	0.729688	0.664395	0.738142	0.120008	0.67789	0.0380427	0.407008	0.811397	0.0308392	0.873441	0.892794	0.804808
C10:0	0.0517016	0.165672	0.413847	0.0600568	0.0712581	0.355995	0.91695	0.396617	0.150422	0.794722	0.0257068	0.329359	0.145534	0.21957	0.811131	0.949003	0.15025	0.4263	0.758655	0.0764252	0.995794	0.537475	0.973295	0.0917983	0.763359	0.978244	0.0388615	0.373316	0.833879	0.573469	0.572993	0.859535	0.77145	0.440334	0.790479	0.521959	0.215612	0.501789	0.931822	0.658308	0.0124336	0.480592	0.00249153	0.159721	0.601674	0.00890178	0.361982	0.712828	0.739871
C12:0-OH-a	0.143239	0.530808	0.25121	0.109621	0.0719565	0.40056	0.216212	0.111375	0.447191	0.727086	0.531406	0.0946709	0.504409	0.0908241	0.210693	0.988934	0.914118	0.297777	0.267755	0.498698	0.892422	0.0527978	0.0748884	0.0433114	0.211762	0.702923	0.888446	0.611617	0.347964	0.375529	0.326636	0.825531	0.427535	0.113836	0.914217	0.944089	0.975956	0.377905	0.153046	0.883279	0.352509	0.731916	0.409733	0.822431	0.740048	0.108421	0.755001	0.634355	0.455412
C12:0-OH-b	0.345342	0.9702	0.455091	0.0145131	0.938069	0.0510873	0.0148581	0.0212372	0.00746181	0.549847	0.271583	0.387429	0.410252	0.11155	0.355643	0.484018	0.645684	0.720895	0.0154695	0.475554	0.181604	0.0689245	0.0439952	0.0763193	0.0172414	0.0563076	0.957595	0.760584	0.0405505	0.441954	0.272651	0.406645	0.358394	0.508765	0.456905	0.629301	0.814667	0.464765	0.0546841	0.288507	0.227079	0.49941	0.220933	0.226181	0.281979	0.00341218	0.32236	0.604349	0.285077
C12:1	0.210466	0.496803	0.483604	0.134558	0.242464	0.198403	0.416354	0.185969	0.154877	0.546956	0.353967	0.264896	0.286826	0.0487705	0.156805	0.465783	0.828763	0.523863	0.0665839	0.344985	0.842463	0.0422179	0.078955	0.0647447	0.251602	0.595436	0.194863	0.461977	0.687156	0.785004	0.590895	0.88029	0.616302	0.881354	0.918404	0.643427	0.483008	0.735212	0.151781	0.652659	0.211491	0.485767	0.0698053	0.450532	0.967279	0.029389	0.852534	0.990491	0.218991
C14:2	0.262986	0.146844	0.282537	0.410938	0.265872	0.907128	0.396875	0.571903	0.719017	0.552956	0.442669	0.25753	0.524358	0.0732164	0.250915	0.655736	0.462224	0.602908	0.274532	0.156883	0.98848	0.0293267	0.167835	0.0325056	0.0790512	0.816737	0.287149	0.38613	0.735908	0.891532	0.332829	0.968371	0.331657	0.180119	0.311835	0.306308	0.607274	0.904956	0.380675	0.672667	0.0479874	0.669838	0.0140589	0.109439	0.761651	0.0743959	0.676545	0.679217	0.415663
C12:0	0.117324	0.346091	0.514497	0.188086	0.0994967	0.450504	0.817093	0.482316	0.31384	0.881032	0.197133	0.383724	0.366884	0.0165524	0.243854	0.546992	0.503219	0.806061	0.304172	0.328877	0.855401	0.105579	0.231129	0.111001	0.958107	0.520163	0.0724725	0.451232	0.76305	0.596239	0.817447	0.649329	0.866036	0.840815	0.547729	0.323534	0.251604	0.584488	0.382567	0.875059	0.0593764	0.660157	0.0135607	0.152709	0.575979	0.0310671	0.68902	0.99488	0.478694
C14:0-OH	0.394	0.89551	0.811558	0.0808738	0.618553	0.882007	0.0228036	0.00148562	0.20377	0.257513	0.335922	0.136377	0.989028	0.242848	0.585777	0.994147	0.886983	0.638157	0.0522355	0.855267	0.820091	0.0590447	0.0463032	0.0158626	0.0335488	0.283641	0.671484	0.575944	0.0171127	0.129022	0.0835665	0.142045	0.19092	0.189248	0.376889	0.382416	0.450476	0.147332	0.611147	0.290618	0.107941	0.904765	0.27362	0.169324	0.296153	0.000383761	0.356955	0.388026	0.290664
C14:1	0.272238	0.17505	0.718674	0.118654	0.258041	0.625225	0.977878	0.193179	0.227566	0.400496	0.40491	0.281889	0.58133	0.154213	0.568279	0.8149	0.0936955	0.574782	0.456612	0.182273	0.741428	0.308592	0.33596	0.0202656	0.534838	0.654176	0.0216521	0.691051	0.692745	0.805001	0.514639	0.806217	0.653996	0.985734	0.768654	0.503258	0.341457	0.772514	0.613765	0.993051	0.00581804	0.885737	0.00108634	0.0199407	0.736254	0.00475652	0.719704	0.650015	0.502784
C14:0	0.481296	0.692736	0.388657	0.18093	0.357946	0.676009	0.731234	0.600702	0.162239	0.506633	0.939531	0.390766	0.379299	0.0153659	0.251382	0.267522	0.555143	0.842719	0.217483	0.826222	0.413128	0.558401	0.1507	0.0828974	0.73852	0.17377	0.14474	0.805883	0.532181	0.186901	0.5349	0.329635	0.380848	0.583643	0.270295	0.132357	0.117683	0.185572	0.612461	0.970108	0.0103645	0.593201	0.00220513	0.0434712	0.787294	0.00489712	0.567984	0.684178	0.180444
C16:1	0.46138	0.258004	0.533972	0.0889393	0.957046	0.296546	0.648186	0.34226	0.0847283	0.47326	0.687129	0.345385	0.872346	0.512057	0.928923	0.799779	0.350651	0.764959	0.191769	0.638445	0.835013	0.826254	0.215007	0.0168431	0.416475	0.5927	0.149317	0.540963	0.447591	0.355504	0.987931	0.991861	0.828848	0.814524	0.47654	0.281347	0.168685	0.332676	0.368966	0.862956	0.00272248	0.673496	0.00123255	0.0128062	0.711109	0.00552584	0.904221	0.857372	0.317174
C16:0-OH	0.0335341	0.345436	0.408947	0.0937473	0.0500898	0.279758	0.568694	0.304801	0.0407	0.325858	0.218214	0.253042	0.613195	0.691308	0.689544	0.322117	0.994053	0.322195	0.429137	0.0774364	0.517924	0.810293	0.0961733	0.233378	0.171623	0.0170058	0.828767	0.324716	0.993048	0.0499522	0.066655	0.359303	0.0696008	0.328741	0.203364	0.19234	0.0943216	0.0592796	0.593552	0.734697	0.218221	0.669144	0.327462	0.367079	0.0040484	0.00550804	0.00374947	0.986644	0.00132248
C18:2	0.639611	0.582867	0.166706	0.154184	0.720358	0.979702	0.00117762	0.0415039	0.0992207	0.555689	0.560636	0.26786	0.502183	0.742102	0.870477	0.351617	0.611809	0.87681	0.0216577	0.767596	0.0978796	0.594264	0.0546966	0.00617931	4.30042e-08	0.0405441	0.649504	0.787808	0.984457	0.51252	0.138188	0.172526	0.360993	0.137094	0.807999	0.828853	0.372621	0.500422	0.97301	0.104928	0.026616	0.0205778	0.0384514	0.0200581	0.00704315	0.00272435	0.0785338	0.48794	0.104466
C16:0	0.297152	0.822793	0.260396	0.00780207	0.877953	0.574368	0.849656	0.101659	0.0100108	0.83119	0.472355	0.936507	0.323633	0.137435	0.501424	0.0893344	0.607005	0.75351	0.0451085	0.193548	0.738993	0.924222	0.0440053	0.316365	0.101727	0.0584015	0.346551	0.839606	0.884285	0.138037	0.390308	0.341162	0.302713	0.23978	0.518656	0.4137	0.317725	0.117478	0.549764	0.66246	0.0821515	0.210544	0.0569438	0.0720079	0.0269141	0.00524164	0.00616909	0.208603	0.00640684
C18:1	0.219371	0.2028	0.772331	0.00698297	0.711977	0.204765	0.0149756	0.0121191	0.00061237	0.182781	0.0922284	0.332173	0.87416	0.572482	0.429034	0.832929	0.0648587	0.0598793	0.26908	0.708903	0.0850205	0.883735	0.749833	0.00239263	0.00585764	0.0716677	0.090044	0.81887	0.134312	0.822437	0.332235	0.367973	0.784638	0.737549	0.954676	0.936797	0.657721	0.767946	0.848903	0.221633	0.000372759	0.259213	0.000206955	9.07642e-05	0.228633	0.00232891	0.881028	0.546159	0.823315
C18:0	0.646715	0.411055	0.620359	0.0203159	0.650843	0.680377	0.0210896	0.00322039	0.0117877	0.908402	0.310473	0.418342	0.670661	0.497115	0.693525	0.339603	0.203541	0.537087	0.027328	0.606359	0.292489	0.376819	0.0199736	0.250908	0.00109411	0.048525	0.105943	0.587161	0.426756	0.337586	0.806232	0.309914	0.787987	0.192252	0.319883	0.264059	0.485445	0.378915	0.55145	0.899409	0.32648	0.178644	0.130958	0.0112069	0.00457201	0.0787558	0.0278544	0.386967	0.00416138
Total cholesterol	0.730378	0.0670823	0.594008	0.152499	0.271722	0.451058	0.147765	0.344668	0.332952	0.881756	0.0361198	0.261372	0.0805756	0.0175754	0.0150826	0.035848	0.277105	0.141529	0.684933	0.17261	0.0341428	0.442236	0.0653112	0.107949	0.156203	0.624275	0.252592	0.131823	0.110812	0.00346609	0.0851414	0.000955799	0.466896	0.36599	0.054245	0.0270375	0.227904	0.00521431	0.695388	0.719687	0.23577	0.408843	0.545584	0.0967957	0.259621	0.00841549	0.665492	0.364644	0.27835
VLDL cholesterol	0.426374	0.0305	0.12297	0.0477388	0.318769	0.366355	0.0101961	0.344905	0.586703	0.495351	0.00395488	0.770876	0.0138655	0.876195	0.662004	0.710707	0.563443	0.556992	0.110137	0.148167	0.000288635	0.129094	0.93312	0.980607	0.0009316	0.661823	0.730378	0.927871	0.243988	0.000400489	0.205561	0.000872278	0.46619	0.276993	0.11545	0.0430767	0.0454674	0.000247861	0.25287	0.620678	0.818519	0.26598	0.928599	0.0604219	0.731414	0.712503	0.428259	0.460412	0.749075
LDL cholesterol	0.553572	0.0323065	0.0515279	0.0207794	0.0785215	0.509717	0.0198621	0.197547	0.397391	0.936981	0.00309478	0.102225	0.00907366	0.0593124	0.0935195	0.0609345	0.977876	0.789029	0.28447	0.51199	0.000136411	0.620516	0.824675	0.461131	0.0248441	0.643267	0.74805	0.0574554	0.021596	0.0265328	0.358689	0.00260547	0.855767	0.742411	0.25609	0.160702	0.531721	0.0276193	0.0940069	0.601491	0.311835	0.279835	0.500029	0.0295374	0.31563	0.031837	0.949019	0.403064	0.629301
HDL cholesterol	0.179729	0.95632	0.256872	0.826903	0.886278	0.535495	0.629164	0.844632	0.089109	0.916587	0.366754	0.941707	0.856134	0.0162965	0.0311168	0.136613	0.110991	0.103354	0.10752	0.189217	0.122877	0.0505945	0.0560119	0.115593	0.367909	0.195921	0.388417	0.566592	0.7366	0.0101667	0.0229324	0.0310618	0.106972	0.150556	0.0266331	0.0152063	0.0716255	0.0222496	0.0170955	0.931874	0.395844	0.772865	0.982996	0.549571	0.369844	0.012878	0.393787	0.340626	0.081969
Total esterified cholesterol	0.712161	0.0799153	0.618105	0.158878	0.263178	0.436351	0.206661	0.36935	0.340892	0.819945	0.0504632	0.259693	0.135743	0.019602	0.0187552	0.0453307	0.226982	0.12438	0.577352	0.174766	0.0652864	0.332922	0.049865	0.0980639	0.218333	0.63899	0.208349	0.158606	0.16668	0.00433449	0.0737715	0.00121937	0.44238	0.449976	0.0463197	0.0245297	0.233358	0.00697515	0.873879	0.733471	0.228648	0.4706	0.495059	0.119896	0.210729	0.00587253	0.594964	0.344875	0.268354
Total free cholesterol	0.843915	0.0686718	0.505024	0.165451	0.280346	0.453281	0.0552169	0.314064	0.42262	0.841403	0.0125553	0.312932	0.0646144	0.0584414	0.0360521	0.0863521	0.496332	0.338324	0.897141	0.173203	0.00793446	0.742997	0.164594	0.142165	0.0383294	0.87597	0.362226	0.163529	0.0942406	0.00169165	0.086973	0.000454237	0.449825	0.301775	0.0506662	0.0198099	0.142409	0.00232567	0.449744	0.96545	0.259819	0.318551	0.615838	0.0568264	0.33064	0.0132433	0.698516	0.482289	0.429302
Apolipoprotein B	0.740757	0.0328615	0.0404004	0.0201626	0.365647	0.436215	0.0556466	0.263384	0.628838	0.853256	0.00346841	0.267358	0.00731064	0.285767	0.283767	0.270972	0.730354	0.737506	0.382156	0.330489	0.000478224	0.679385	0.895649	0.835385	0.0184506	0.804646	0.576607	0.210388	0.0691839	0.0311052	0.734002	0.00837472	0.795067	0.8857	0.32149	0.218684	0.571885	0.0256118	0.0524039	0.713856	0.669169	0.653513	0.886461	0.05479	0.599753	0.200992	0.859734	0.602773	0.590163
Apolipoprotein A1	0.182178	0.859374	0.102067	0.933517	0.687832	0.414868	0.455126	0.819232	0.164241	0.766201	0.544201	0.980432	0.721078	0.0141904	0.0205019	0.21819	0.076769	0.0529987	0.353328	0.303091	0.61532	0.237963	0.140369	0.0901574	0.527126	0.513605	0.29976	0.843556	0.834953	0.00153513	0.00682719	0.0161196	0.0617373	0.0533263	0.0217085	0.00727756	0.0116795	0.00321656	0.00959189	0.773203	0.247978	0.127633	0.752227	0.928235	0.18983	0.00760278	0.18983	0.169264	0.135836
Total lipoprotein particles	0.288415	0.580384	0.268391	0.587648	0.343478	0.347718	0.20818	0.387908	0.234113	0.789419	0.829941	0.726688	0.41279	0.00319593	0.00383228	0.0557227	0.0693042	0.0185544	0.617095	0.42328	0.493271	0.461394	0.143251	0.0849393	0.240249	0.579439	0.285676	0.544054	0.59369	0.000561886	0.00586716	0.00437071	0.0720413	0.131393	0.0116836	0.00409611	0.012195	0.00116831	0.0363515	0.923496	0.192859	0.0503248	0.49915	0.519266	0.0768369	0.00146984	0.143716	0.0522108	0.273832
VLDL particles	0.599753	0.0746294	0.294802	0.0794181	0.192052	0.183069	0.00237847	0.0949921	0.594008	0.708741	0.00901271	0.767368	0.0574554	0.940744	0.827003	0.868707	0.469991	0.512952	0.0348886	0.328417	0.000294817	0.0842224	0.407817	0.92582	5.24852e-05	0.911859	0.836027	0.911496	0.130856	1.02485e-05	0.0971255	0.00165002	0.317403	0.118203	0.0617497	0.015248	0.00342457	4.37653e-06	0.225647	0.43936	0.841045	0.0543053	0.864419	0.067729	0.986287	0.427181	0.752924	0.379284	0.401887
LDL particles	0.542526	0.0371056	0.0169971	0.0216219	0.189507	0.445391	0.0566388	0.184342	0.614222	0.769706	0.00262232	0.245947	0.00663287	0.272617	0.315957	0.243841	0.843721	0.921897	0.320644	0.350232	0.000308847	0.558801	0.988292	0.939312	0.0236062	0.915495	0.54589	0.199675	0.0633055	0.038724	0.64557	0.00754263	0.925318	0.989757	0.339013	0.254337	0.629638	0.0327419	0.0604977	0.631594	0.696138	0.647556	0.76375	0.03923	0.575351	0.181871	0.861175	0.571409	0.490516
HDL particles	0.274073	0.659159	0.174901	0.739193	0.409623	0.344157	0.286938	0.44295	0.211584	0.778138	0.910949	0.808326	0.513308	0.0026161	0.00422492	0.0565914	0.063932	0.020049	0.565148	0.43041	0.727422	0.38737	0.150412	0.0908383	0.375107	0.415434	0.282329	0.601033	0.738331	0.000750461	0.00541827	0.00826345	0.0574751	0.122502	0.0151647	0.00546595	0.0120579	0.00156028	0.0224796	0.902226	0.192378	0.0582177	0.531287	0.6565	0.0814906	0.0011532	0.11967	0.0510233	0.269261
Phosphoglycerides	0.398683	0.431229	0.266983	0.830477	0.300512	0.267448	0.0237588	0.180951	0.31228	0.700216	0.428791	0.843695	0.256286	0.0330597	0.0292565	0.285422	0.160172	0.0943037	0.819213	0.265831	0.188998	0.686804	0.363325	0.0758081	0.0155037	0.890807	0.209537	0.949749	0.688006	6.48537e-06	0.00194603	0.00112889	0.0439735	0.0258056	0.00639326	0.00102299	0.00135828	1.42212e-05	0.0998496	0.550007	0.306968	0.0237893	0.861175	0.332026	0.169437	0.011275	0.145534	0.107848	0.314138
Chylomicrons & XXL-VLDL particles	0.163244	0.25746	0.399718	0.922408	0.981716	0.605655	0.152709	0.414375	0.805001	0.367376	0.529921	0.0794648	0.841045	0.295335	0.735094	0.263933	0.589998	0.715585	0.141423	0.173723	0.447176	0.238986	0.752105	0.417253	0.144174	0.249893	0.314064	0.00813253	0.29976	0.00531372	0.0782379	0.0831738	0.161245	0.588484	0.020986	0.0152689	0.00302708	0.0055003	0.107519	0.0602085	0.642608	0.610026	0.419418	0.461282	0.4253	0.410419	0.269602	0.346536	0.682075
XL-VLDL particles	0.0925666	0.101075	0.392761	0.17707	0.200573	0.323383	0.00441189	0.569088	0.540696	0.234481	0.25922	0.700822	0.335042	0.197287	0.24075	0.183585	0.40331	0.195223	0.00866722	0.487373	0.0173094	0.0667792	0.0641629	0.585352	0.000988033	0.899147	0.553264	0.10347	0.745269	0.000174022	0.0777537	0.0881265	0.166804	0.146186	0.0618167	0.0239726	0.000577984	0.000103342	0.849177	0.370062	0.76445	0.0478239	0.987384	0.244555	0.792246	0.898422	0.818875	0.435813	0.238327
L-VLDL particles	0.098045	0.0538841	0.349903	0.0688865	0.204807	0.190748	0.00395226	0.564723	0.332257	0.484043	0.149682	0.89241	0.337608	0.319364	0.467269	0.487663	0.292511	0.205956	0.0154145	0.398407	0.0103969	0.0777396	0.0751417	0.90962	0.000546695	0.907498	0.954495	0.533707	0.31563	7.60107e-05	0.0644714	0.0604181	0.161315	0.0709061	0.0723204	0.0257417	0.000840498	3.74456e-05	0.477787	0.594304	0.730724	0.0606856	0.961434	0.202316	0.832447	0.629164	0.659492	0.682922	0.207215
M-VLDL particles	0.31006	0.0215679	0.115669	0.0103433	0.155905	0.34903	0.012663	0.424495	0.463813	0.814244	0.00379987	0.546857	0.0530497	0.891413	0.59766	0.581055	0.484579	0.621011	0.127473	0.214365	0.000431495	0.180235	0.86399	0.946247	0.00385549	0.560684	0.720735	0.634069	0.0847148	0.00020979	0.177598	0.00278657	0.45024	0.331059	0.0763595	0.0328615	0.0329731	0.000123917	0.164098	0.911854	0.507089	0.220088	0.694101	0.0575186	0.914041	0.28379	0.685303	0.609521	0.589052
S-VLDL particles	0.847505	0.143975	0.277974	0.0678329	0.292549	0.103442	0.00200195	0.0523428	0.619402	0.891895	0.0380171	0.8299	0.079341	0.935999	0.840432	0.84279	0.386847	0.398171	0.0265491	0.6104	0.000714617	0.050509	0.154125	0.903623	9.93302e-06	0.994332	0.84966	0.886099	0.0957483	1.61776e-05	0.0970776	0.0087551	0.241799	0.0796098	0.0739306	0.0189148	0.00139094	5.41237e-06	0.204935	0.453149	0.846787	0.0339544	0.605522	0.126455	0.678563	0.484908	0.311391	0.391835	0.161021
XS-VLDL particles	0.860455	0.227206	0.47601	0.509447	0.447212	0.350583	0.00775264	0.0726249	0.966183	0.299977	0.0200702	0.935506	0.0460553	0.91158	0.949725	0.759307	0.708203	0.503919	0.115191	0.26804	0.00277379	0.490233	0.528059	0.592972	4.06377e-05	0.498272	0.59369	0.842479	0.570026	0.000932411	0.20699	0.00207744	0.550936	0.15468	0.14737	0.0390915	0.0354283	0.000684734	0.268795	0.263653	0.907498	0.216937	0.592735	0.0995997	0.83746	0.609382	0.581014	0.634704	0.573439
IDL particles	0.49681	0.099502	0.207841	0.0477931	0.917313	0.343566	0.897333	0.968741	0.49302	0.865861	0.0591133	0.476037	0.0875954	0.253513	0.256056	0.343927	0.761979	0.912785	0.273715	0.164823	0.358773	0.183772	0.0654515	0.447752	0.495382	0.622324	0.442401	0.279007	0.749093	0.166248	0.916949	0.0234362	0.507807	0.966355	0.406224	0.263185	0.965633	0.181871	0.317132	0.787817	0.565346	0.832805	0.951209	0.21746	0.819588	0.426374	0.566281	0.920402	0.401108
L-LDL particles	0.524058	0.016146	0.0363176	0.0547861	0.369713	0.694249	0.0271735	0.298246	0.965817	0.753969	0.000840035	0.433004	0.00546595	0.246874	0.289453	0.330028	0.825461	0.965936	0.19856	0.152445	0.000275153	0.543876	0.851023	0.681566	0.00812946	0.66049	0.33087	0.277562	0.132795	0.0235165	0.46451	0.00361588	0.889353	0.80068	0.277768	0.200168	0.498837	0.020125	0.112001	0.904223	0.643597	0.697496	0.769356	0.0402584	0.627533	0.152303	0.608094	0.699518	0.748031
M-LDL particles	0.622974	0.12046	0.0174837	0.01109	0.0955536	0.306271	0.0365787	0.0778792	0.500908	0.999817	0.00655628	0.146015	0.0176485	0.473805	0.644757	0.377787	0.526273	0.518471	0.213336	0.78706	0.000245899	0.445122	0.335261	0.83897	0.0244983	0.789419	0.910042	0.162394	0.0215119	0.13243	0.921316	0.0351354	0.669489	0.796605	0.547729	0.387654	0.639796	0.114685	0.0175613	0.448711	0.700557	0.403093	0.76305	0.038587	0.400236	0.249317	0.595283	0.335944	0.108259
S-LDL particles	0.608738	0.101471	0.0181509	0.0161006	0.179493	0.614033	0.416229	0.432312	0.491857	0.95559	0.0291173	0.114751	0.0454778	0.504108	0.610662	0.359884	0.662126	0.683216	0.735534	0.58738	0.00946739	0.955587	0.688194	0.832878	0.375107	0.949384	0.656832	0.135001	0.0961281	0.203313	0.872717	0.039248	0.472853	0.459593	0.380319	0.377308	0.824219	0.197221	0.0944286	0.28733	0.807842	0.757458	0.890807	0.200168	0.520761	0.15598	0.982265	0.924406	0.529745
XL-HDL particles	0.417025	0.864058	0.551416	0.93297	0.279828	0.894061	0.0166792	0.100778	0.285466	0.174006	0.220169	0.411349	0.337842	0.408845	0.478087	0.30517	0.855941	0.39662	0.0247488	0.035891	0.000866984	0.00788327	0.206511	0.545783	0.0567426	0.513902	0.709424	0.978244	0.0477152	0.463813	0.468041	0.361793	0.507069	0.328409	0.25492	0.268592	0.693749	0.589557	0.475356	0.879397	0.945005	0.0293189	0.548957	0.135248	0.771812	0.647556	0.805001	0.56066	0.117517
L-HDL particles	0.167258	0.730724	0.374312	0.735212	0.331903	0.736407	0.0369293	0.17267	0.0799976	0.300411	0.0856182	0.524249	0.502376	0.623238	0.662004	0.955576	0.559098	0.98736	0.0274469	0.0658591	0.000994207	0.0142582	0.119591	0.326187	0.0556863	0.206661	0.747702	0.873802	0.079341	0.086102	0.159505	0.173871	0.227094	0.194804	0.0803275	0.0679456	0.221566	0.141148	0.0810637	0.984458	0.950844	0.182949	0.417556	0.0749416	0.817093	0.256481	0.576607	0.952849	0.0878803
M-HDL particles	0.249701	0.919497	0.0827515	0.928416	0.607928	0.449119	0.413582	0.779193	0.169875	0.856854	0.461977	0.875577	0.68902	0.0174579	0.0211967	0.234059	0.0768487	0.0419036	0.433618	0.370191	0.656138	0.275887	0.141261	0.0887628	0.572794	0.515985	0.310503	0.960703	0.833163	0.00119907	0.00530462	0.0132206	0.0505981	0.0561518	0.0173901	0.00588165	0.0089906	0.00261382	0.00461109	0.705139	0.241165	0.105192	0.730378	0.907135	0.193983	0.00748924	0.194628	0.136961	0.143879
S-HDL particles	0.727619	0.364183	0.973857	0.265872	0.103767	0.47669	0.00902047	0.190783	0.374063	0.619402	0.28441	0.426656	0.0303128	0.000918099	0.00191034	0.0060174	0.346165	0.0501574	0.413796	0.890774	0.00313661	0.530053	0.574372	0.269693	0.0263016	0.459038	0.594645	0.404396	0.0313348	0.00117048	0.0319121	0.00498222	0.202212	0.296578	0.0481514	0.0176958	0.0272855	0.0016175	0.458102	0.946279	0.424227	0.0176722	0.815312	0.324218	0.134017	0.017043	0.414375	0.0273343	0.808361
Creatinine	0.00143291	0.258637	0.656832	0.480154	0.353734	0.0161923	0.936252	0.716958	0.839611	0.853975	0.354456	0.397654	0.062693	0.262849	0.0540059	0.621566	0.0463784	0.103707	0.344379	0.769462	0.585244	0.0334739	0.735779	0.127146	0.164481	0.619726	0.433667	0.289685	0.544054	0.0372826	0.0688865	0.144761	0.110371	0.223298	0.0450615	0.0131144	0.00568579	0.0509521	0.0599067	0.650512	0.562236	0.117102	0.823156	0.789066	0.776379	0.650201	0.560064	0.000738986	0.178327
Albumin	0.142813	0.370587	0.134263	0.408967	0.0192158	0.81334	0.00449772	0.00680732	0.335042	0.123776	0.544048	0.632016	0.416494	4.24066e-05	0.000630604	0.0025786	0.0236088	0.00635989	0.000344014	0.0465422	0.164844	0.0431884	7.32432e-05	0.134313	0.0266854	0.00710338	0.324218	0.455126	0.239109	0.370092	0.667993	0.721729	0.519695	0.612653	0.709083	0.553264	0.34595	0.298246	0.0582254	0.578628	0.282329	0.435298	0.209707	0.507679	0.514497	0.877054	0.0156915	0.370186	3.33331e-05
[truncated: 54 more columns]

## Sheet: Sp. Rho - Baseline
	Leptin	Insulin	Adiponectin	TNF.a	IL.6	IL.10	CRP	CD14	MCP.1	ICAM	LBP	N.Ac.glycopr	LDLox	Isoleucine	Leucine	Valine	Alanine	Phenylalanine	Glutamine	Glutamate	Glycine	Methionine	Tyrosine	Tryptophan	Betaine	Glucose	Lactate	Pyruvate	Citrate	Total.FA	PUFA	Omega.3.FA	ARA...EPA	DHA	Linoleic.acid	MUFA	Oleic.acid	SFA	Choline	Lysophosphatidylcholine	X3.Hydroxybutyrate	Acetate	Acetoacetate	Acetone	C0	C2.0	C3.0	C5.DC	C5.OH
Leptin	1	0.255172	0.218719	-0.238916	0.312315	-0.336946	0.349261	0.298522	-0.18867	0.0940887	0.264532	0.231888	-0.176847	-0.148304	-0.136011	-0.0150283	-0.171429	-0.146234	-0.153486	-0.0327667	-0.41562	-0.0985222	-0.0335182	-0.0571922	0.113919	0.0103448	0.219704	0.222167	0.0428571	-0.0108374	-0.0911442	-0.110837	-0.190418	0.0243933	-0.147783	-0.0955665	-0.10197	-0.000492611	0.063132	0.378911	-0.113793	-0.0216749	-0.148276	-0.23202	0.374384	0.166502	0.287685	-0.204433	0.245597
Insulin	0.255172	1	-0.330542	0.15665	-0.200493	0.169951	0.14532	0.17734	-0.00640394	-0.163547	0.250246	-0.0867422	0.245813	0.418261	0.352593	0.378911	0.269951	0.111593	0.315841	0.541513	-0.140921	0.110345	0.248429	0.199187	-0.0840834	0.314778	0.164039	-0.180296	-0.142365	0.0216749	0.0551792	0.147783	-0.00936076	0.0877171	-0.106404	-0.0640394	-0.0699507	0.0187192	-0.177312	0.122937	-0.244335	0.0507389	-0.202463	-0.54532	0.144335	-0.0876847	0.238916	0.18867	0.06454
Adiponectin	0.218719	-0.330542	1	-0.559606	-0.0527094	-0.493103	0.204433	0.0502463	-0.469458	0.00640394	-0.0044335	0.109167	-0.29064	-0.041456	0.00887027	0.0266075	-0.149754	0.0524563	-0.132545	-0.344173	-0.136733	-0.218227	0.0273568	-0.0576852	0.0535076	-0.112808	0.00591133	0.0300493	-0.176847	0.0108374	0.0657716	0.0300493	0.0160118	0.0887027	0.0541872	0.0256158	-0.0896552	0.00394089	0.219236	0.292437	0.124631	-0.0871921	0.0275862	0.20936	-0.170936	-0.0738916	-0.243842	-0.14335	0.103461
TNF.a	-0.238916	0.15665	-0.559606	1	-0.208867	0.769458	-0.128079	0.0719212	0.718227	-0.0802956	0.105419	0.058896	0.601478	0.171499	0.104226	-0.00985464	0.0384236	0.0596319	0.274205	0.213846	0.0793299	0.183251	0.0653112	0.0387033	0.0722476	0.129557	-0.0300493	-0.117241	0.0374384	0.0394089	-0.00862175	0.212315	-0.0226629	0.13404	-0.00689655	0.0428571	0.184236	0.0458128	-0.108261	-0.0995319	-0.053202	0.235468	0.00640394	-0.0300493	0.101478	0.0802956	0.270936	0.0640394	0.0160118
IL.6	0.312315	-0.200493	-0.0527094	-0.208867	1	-0.221675	0.258621	-0.0522167	-0.0275862	0.27734	0.277833	0.00566782	-0.166995	-0.21641	-0.162622	-0.132545	-0.213793	-0.167761	-0.439024	-0.420301	-0.44814	-0.182759	-0.154282	-0.0917047	0.0263839	-0.214286	0.0310345	0.216256	0.00295567	-0.134483	-0.181303	-0.249754	-0.291169	-0.372059	-0.124631	-0.079803	-0.0413793	-0.131527	0.129223	0.101256	-0.0236453	-0.460591	-0.0403941	-0.0561576	0.136946	0.0847291	-0.0305419	0.0985222	-0.116763
IL.10	-0.336946	0.169951	-0.493103	0.769458	-0.221675	1	-0.296059	-0.145813	0.720197	-0.218719	-0.0935961	0.0155249	0.700985	0.307712	0.258716	0.115053	0.251232	0.194979	0.403794	0.184528	0.186499	0.319704	0.163401	0.0921977	0.162002	0.189655	-0.00837438	-0.149261	0.0931034	0.194581	0.0810445	0.242857	0.112083	0.138968	0.169458	0.126601	0.200493	0.20197	0.175339	-0.23528	0.0812808	0.0650246	0.120197	0.0187192	0.184236	0.331527	0.247291	0.193596	0.112083
CRP	0.349261	0.14532	0.204433	-0.128079	0.258621	-0.296059	1	-0.27734	-0.246305	0.142365	0.568966	-0.0372105	0.0527094	0.0143122	-0.107675	-0.105937	-0.383251	-0.202897	-0.649667	-0.0761271	-0.829515	-0.408867	-0.25459	0.26057	-0.653434	-0.276355	-0.0650246	-0.13202	-0.304926	0.262562	0.256928	0.308867	0.114053	0.351115	0.0571429	0.224631	0.291626	0.269458	-0.170407	0.635625	0.153202	-0.229064	0.175862	-0.202956	-0.196552	-0.133005	-0.194581	-0.176355	-0.131543
CD14	0.298522	0.17734	0.0502463	0.0719212	-0.0522167	-0.145813	-0.27734	1	0.152709	0.218719	-0.0477833	0.218088	-0.234975	-0.0486121	0.040409	0.0771126	0.0482759	0.0534461	0.432865	0.276176	0.287509	0.248276	0.349476	0.0599039	0.387869	0.234975	-0.127094	0.0921182	0.0650246	-0.227094	0.0204459	-0.0862069	-0.00566572	0.0648023	-0.145813	-0.0990148	-0.0945813	-0.232512	-0.257707	-0.0305494	-0.33399	0.14532	-0.313793	-0.0211823	0.431527	0.259113	0.538916	0.0197044	0.446114
MCP.1	-0.18867	-0.00640394	-0.469458	0.718227	-0.0275862	0.720197	-0.246305	0.152709	1	0.122167	-0.206897	0.137999	0.504926	-0.0387416	-0.136504	-0.203745	0.0704433	-0.111593	0.174181	0.13082	0.18847	0.167488	-0.0069008	-0.0177493	0.197756	0.0906404	-0.0167488	0.208867	0.232512	0.126601	0.0586279	0.222167	0.0778421	0.208944	0.126601	0.129557	0.264532	0.133005	0.217756	-0.231831	-0.000985222	0.104926	0.0793103	0.0881773	0.249261	0.281773	0.324138	0.135468	0.099766
ICAM	0.0940887	-0.163547	0.00640394	-0.0802956	0.27734	-0.218719	0.142365	0.218719	0.122167	1	0.053202	0.383194	-0.0931034	-0.108082	-0.217568	-0.311653	-0.273892	-0.229125	-0.171224	-0.00123183	-0.132299	0.0325123	-0.19273	-0.258597	-0.0727408	-0.214778	-0.0152709	0.232512	0.10197	0.0852217	0.029314	-0.0128079	-0.0992733	-0.0303068	0.105911	0.26798	0.20197	0.0827586	0.116153	0.0253757	0.238916	0.229557	0.372906	0.259113	-0.00935961	0.0625616	-0.116749	0.0211823	0.0120705
LBP	0.264532	0.250246	-0.0044335	0.105419	0.277833	-0.0935961	0.568966	-0.0477833	-0.206897	0.053202	1	-0.18827	-0.0669951	0.148797	0.260441	0.286277	-0.138916	0.127182	-0.209411	0.0808081	-0.497413	-0.273892	0.128158	0.199433	-0.249045	-0.0403941	-0.00788177	-0.148276	-0.477833	-0.00147783	0.0987806	0.0763547	-0.0145338	0.0258716	-0.179803	-0.00935961	0.0157635	-0.000492611	-0.190629	0.377679	0.008867	-0.0128079	-0.0172414	-0.234975	-0.0561576	-0.208374	0.117734	-0.24335	0.0137948
N.Ac.glycopr	0.231888	-0.0867422	0.109167	0.058896	0.00566782	0.0155249	-0.0372105	0.218088	0.137999	0.383194	-0.18827	1	0.242484	-0.120849	-0.0717367	-0.197313	0.0246427	0.139994	0.039931	0.143579	0.0622381	0.165845	0.024288	-0.350845	0.187369	0.27378	0.473879	0.368901	0.340315	0.381222	0.265434	0.148595	0.216513	0.142118	0.240266	0.224988	0.326516	0.384426	0.25697	0.22529	0.214638	0.346969	0.230902	0.220552	0.228438	0.145638	0.0241498	0.304091	0.205176
LDLox	-0.176847	0.245813	-0.29064	0.601478	-0.166995	0.700985	0.0527094	-0.234975	0.504926	-0.0931034	-0.0669951	0.242484	1	0.407897	0.310952	0.194876	0.119212	0.165287	0.155457	0.220498	-0.116531	-0.0586207	-0.0362292	0.17133	-0.0756997	0.115764	0.105911	-0.0738916	-0.01133	0.337931	0.259392	0.451724	0.206676	0.35555	0.19064	0.176847	0.34335	0.343842	0.114427	0.105937	0.212315	0.100985	0.254187	0.0103448	0.127586	0.241379	0.171921	0.368473	0.0862175
Isoleucine	-0.148304	0.418261	-0.041456	0.171499	-0.21641	0.307712	0.0143122	-0.0486121	-0.0387416	-0.108082	0.148797	-0.120849	0.407897	1	0.823254	0.769346	0.460457	0.446333	0.420462	0.29088	-0.0620759	0.152005	0.332346	0.314275	0.00741107	0.2934	0.0853795	-0.291919	-0.357064	0.05182	0.155602	0.0801975	0.0832923	0.102321	-0.0409624	0.0305984	0.106848	0.0552746	0.167881	0.0561521	-0.28575	-0.164837	-0.232696	-0.257866	0.0412092	-0.189019	0.180383	0.353856	0.250988
Leucine	-0.136011	0.352593	0.00887027	0.104226	-0.162622	0.258716	-0.107675	0.040409	-0.136504	-0.217568	0.260441	-0.0717367	0.310952	0.823254	1	0.923968	0.463718	0.675006	0.43968	0.285028	0.0207024	0.201799	0.58395	0.321332	0.149605	0.257238	0.0172478	-0.346926	-0.566958	0.00271036	0.0864958	0.0174941	0.0055446	-0.0523786	-0.0569176	-0.0320315	-0.0317851	0.00172478	0.134205	0.0335182	-0.339042	-0.0953554	-0.28311	-0.30972	0.0409018	-0.251324	0.230873	0.189479	0.293248
Valine	-0.0150283	0.378911	0.0266075	-0.00985464	-0.132545	0.115053	-0.105937	0.0771126	-0.203745	-0.311653	0.286277	-0.197313	0.194876	0.769346	0.923968	1	0.437546	0.538305	0.374815	0.33859	-0.0241498	0.130574	0.52496	0.340155	0.145024	0.302291	-0.000985464	-0.262873	-0.559497	-0.0433604	0.0741653	-0.0206948	0.0325243	-0.0772643	-0.10101	-0.0889382	-0.104459	-0.0448386	0.0552541	0.04448	-0.358216	-0.110618	-0.334319	-0.312392	0.114068	-0.256221	0.321261	0.184035	0.317605
Alanine	-0.171429	0.269951	-0.149754	0.0384236	-0.213793	0.251232	-0.383251	0.0482759	0.0704433	-0.273892	-0.138916	0.0246427	0.119212	0.460457	0.463718	0.437546	1	0.682427	0.633407	0.421779	0.393447	0.244828	0.428836	0.295329	0.134632	0.252217	0.501478	0.155172	-0.0669951	-0.0980296	0.128834	-0.0940887	0.155192	-0.0263644	-0.0635468	-0.183744	-0.1	-0.0975369	0.246609	-0.25967	-0.587192	-0.155665	-0.631527	-0.396059	0.218719	-0.137931	0.274877	0.428571	0.393891
Phenylalanine	-0.146234	0.111593	0.0524563	0.0596319	-0.167761	0.194979	-0.202897	0.0534461	-0.111593	-0.229125	0.127182	0.139994	0.165287	0.446333	0.675006	0.538305	0.682427	1	0.505016	0.338451	0.278928	0.156627	0.639644	0.324296	0.0917766	0.155142	0.234569	-0.145245	-0.31449	0.0967473	0.312302	0.0925409	0.275182	0.05755	0.092046	-0.0168256	0.0274653	0.0952627	0.270037	-0.054078	-0.367689	-0.0771999	-0.385504	-0.2509	0.0502294	-0.182113	0.225661	0.198196	0.449893
Glutamine	-0.153486	0.315841	-0.132545	0.274205	-0.439024	0.403794	-0.649667	0.432865	0.174181	-0.171224	-0.209411	0.039931	0.155457	0.420462	0.43968	0.374815	0.633407	0.505016	1	0.425333	0.597831	0.406011	0.58055	0.195167	0.48958	0.299581	0.176891	-0.0290712	0.0576497	-0.0645479	0.0694838	0.00763735	0.0990514	0.0574245	0.0613452	-0.0246366	-0.0751417	-0.0694752	0.00777011	-0.403894	-0.40675	0.201281	-0.376201	-0.10914	0.371274	0.137719	0.400591	0.283567	0.513983
Glutamate	-0.0327667	0.541513	-0.344173	0.213846	-0.420301	0.184528	-0.0761271	0.276176	0.13082	-0.00123183	0.0808081	0.143579	0.220498	0.29088	0.285028	0.33859	0.421779	0.338451	0.425333	1	0.288196	0.283321	0.324294	0.266552	-0.012332	0.408721	0.0571569	-0.0886918	-0.102981	0.413895	0.536159	0.35797	0.565357	0.338632	0.338753	0.282828	0.268785	0.407243	-0.201776	-0.0377033	-0.20473	0.417344	-0.0643016	-0.110372	0.334812	-0.11998	0.423996	0.254003	0.441173
Glycine	-0.41562	-0.140921	-0.136733	0.0793299	-0.44814	0.186499	-0.829515	0.287509	0.18847	-0.132299	-0.497413	0.0622381	-0.116531	-0.0620759	0.0207024	-0.0241498	0.393447	0.278928	0.597831	0.288196	1	0.31732	0.238506	-0.160523	0.520533	0.411431	0.0522296	0.148312	0.276423	-0.0253757	0.0704694	-0.0643016	0.206357	-0.115096	0.1424	-0.0118256	-0.027593	-0.0335058	0.0749877	-0.459586	-0.160877	0.326928	-0.111111	0.293668	0.127864	0.010101	0.206701	0.150283	0.146975
Methionine	-0.0985222	0.110345	-0.218227	0.183251	-0.182759	0.319704	-0.408867	0.248276	0.167488	0.0325123	-0.273892	0.165845	-0.0586207	0.152005	0.201799	0.130574	0.244828	0.156627	0.406011	0.283321	0.31732	1	0.344301	0.0458524	0.37554	0.309852	-0.091133	-0.250246	0.0876847	0.120197	0.102229	-0.0216749	0.0867102	-0.160897	0.188177	0.151724	0.020197	0.122167	0.132676	-0.40478	-0.245813	0.17734	-0.130542	0.0192118	0.017734	-0.0339901	0.0497537	0.19803	0.249292
Tyrosine	-0.0335182	0.248429	0.0273568	0.0653112	-0.154282	0.163401	-0.25459	0.349476	-0.0069008	-0.19273	0.128158	0.024288	-0.0362292	0.332346	0.58395	0.52496	0.428836	0.639644	0.58055	0.324294	0.238506	0.344301	1	0.344475	0.413521	0.216882	-0.0741836	-0.124214	-0.396303	0.149107	0.243899	0.197659	0.157136	0.0283531	0.234381	0.186815	0.0729513	0.143192	0.116101	-0.0266239	-0.420949	-0.141466	-0.361553	-0.288355	0.278004	-0.101047	0.408626	0.138016	0.646044
Tryptophan	-0.0571922	0.199187	-0.0576852	0.0387033	-0.0917047	0.0921977	0.26057	0.0599039	-0.0177493	-0.258597	0.199433	-0.350845	0.17133	0.314275	0.321332	0.340155	0.295329	0.324296	0.195167	0.266552	-0.160523	0.0458524	0.344475	1	-0.252345	-0.119808	-0.270677	-0.394429	-0.440528	0.0791323	0.420242	0.402564	0.337771	0.553638	0.048071	0.123012	0.118822	0.0848022	-0.264717	0.090741	-0.479231	-0.383336	-0.384815	-0.466166	0.189079	0.00320473	0.317022	0.0801184	0.475962
Betaine	0.113919	-0.0840834	0.0535076	0.0722476	0.0263839	0.162002	-0.653434	0.387869	0.197756	-0.0727408	-0.249045	0.187369	-0.0756997	0.00741107	0.149605	0.145024	0.134632	0.0917766	0.48958	-0.012332	0.520533	0.37554	0.413521	-0.252345	1	0.385403	0.0922205	0.0806313	0.00542474	-0.0747134	-0.232183	-0.255702	-0.176819	-0.23742	-0.00197263	-0.13981	-0.255949	-0.0774258	0.217504	-0.394253	-0.206633	0.235236	-0.15929	0.14055	0.445075	0.042165	0.38269	-0.0214524	0.358447
Glucose	0.0103448	0.314778	-0.112808	0.129557	-0.214286	0.189655	-0.276355	0.234975	0.0906404	-0.214778	-0.0403941	0.27378	0.115764	0.2934	0.257238	0.302291	0.252217	0.155142	0.299581	0.408721	0.411431	0.309852	0.216882	-0.119808	0.385403	1	0.35665	0.163547	0.147783	0.231034	0.239192	0.19803	0.242148	-0.0709622	0.197044	0.170936	0.163547	0.227586	0.105795	0.151515	-0.0788177	0.218227	0.00935961	0.182266	0.224138	-0.091133	0.355665	0.369458	0.194852
Lactate	0.219704	0.164039	0.00591133	-0.0300493	0.0310345	-0.00837438	-0.0650246	-0.127094	-0.0167488	-0.0152709	-0.00788177	0.473879	0.105911	0.0853795	0.0172478	-0.000985464	0.501478	0.234569	0.176891	0.0571569	0.0522296	-0.091133	-0.0741836	-0.270677	0.0922205	0.35665	1	0.564532	0.269951	0.00738916	-0.0948393	-0.130049	-0.10691	-0.147591	-0.0778325	-0.139409	-0.044335	0.0108374	0.30111	0.0869672	-0.13202	0.142365	-0.192118	-0.111823	0.0704433	-0.159606	-0.0280788	0.260591	0.0199532
Pyruvate	0.222167	-0.180296	0.0300493	-0.117241	0.216256	-0.149261	-0.13202	0.0921182	0.208867	0.232512	-0.148276	0.368901	-0.0738916	-0.291919	-0.346926	-0.262873	0.155172	-0.145245	-0.0290712	-0.0886918	0.148312	-0.250246	-0.124214	-0.394429	0.0806313	0.163547	0.564532	1	0.521675	0.0364532	0.00541939	-0.0330049	-0.0349797	-0.252803	0.121675	0.118719	0.269951	0.0374384	0.283354	0.171717	0.0857143	0.0137931	0.0458128	0.29803	0.123153	0.164532	0.037931	0.346798	-0.0182288
Citrate	0.0428571	-0.142365	-0.176847	0.0374384	0.00295567	0.0931034	-0.304926	0.0650246	0.232512	0.10197	-0.477833	0.340315	-0.01133	-0.357064	-0.566958	-0.559497	-0.0669951	-0.31449	0.0576497	-0.102981	0.276423	0.0876847	-0.396303	-0.440528	0.00542474	0.147783	0.269951	0.521675	1	0.0231527	0.000492672	-0.0901478	0.0941003	-0.135518	0.062069	0.0123153	0.198522	0.0261084	0.111714	-0.0776053	0.332512	0.129557	0.263054	0.461084	-0.000985222	0.425616	-0.244335	0.3	-0.226136
Total.FA	-0.0108374	0.0216749	0.0108374	0.0394089	-0.134483	0.194581	0.262562	-0.227094	0.126601	0.0852217	-0.00147783	0.381222	0.337931	0.05182	0.00271036	-0.0433604	-0.0980296	0.0967473	-0.0645479	0.413895	-0.0253757	0.120197	0.149107	0.0791323	-0.0747134	0.231034	0.00738916	0.0364532	0.0231527	1	0.775958	0.768473	0.706491	0.492054	0.888177	0.849754	0.812808	0.999507	0.177559	0.30303	0.3133	0.203448	0.478818	0.269458	0.130049	0.0167488	0.0453202	0.241872	0.306688
PUFA	-0.0911442	0.0551792	0.0657716	-0.00862175	-0.181303	0.0810445	0.256928	0.0204459	0.0586279	0.029314	0.0987806	0.265434	0.259392	0.155602	0.0864958	0.0741653	0.128834	0.312302	0.0694838	0.536159	0.0704694	0.102229	0.243899	0.420242	-0.232183	0.239192	-0.0948393	0.00541939	0.000492672	0.775958	1	0.781377	0.931757	0.625924	0.676192	0.676684	0.759453	0.77448	0.085214	0.274732	0.117009	0.0490208	0.191157	0.18081	0.111344	0.0729154	0.190664	0.449316	0.452082
Omega.3.FA	-0.110837	0.147783	0.0300493	0.212315	-0.249754	0.242857	0.308867	-0.0862069	0.222167	-0.0128079	0.0763547	0.148595	0.451724	0.0801975	0.0174941	-0.0206948	-0.0940887	0.0925409	0.00763735	0.35797	-0.0643016	-0.0216749	0.197659	0.402564	-0.255702	0.19803	-0.130049	-0.0330049	-0.0901478	0.768473	0.781377	1	0.619534	0.627572	0.740394	0.795074	0.737931	0.763547	0.0527744	0.42646	0.174877	0.0374384	0.311823	0.0950739	0.0517241	0.0482759	0.168473	0.307389	0.330583
ARA...EPA	-0.190418	-0.00936076	0.0160118	-0.0226629	-0.291169	0.112083	0.114053	-0.00566572	0.0778421	-0.0992733	-0.0145338	0.216513	0.206676	0.0832923	0.0055446	0.0325243	0.155192	0.275182	0.0990514	0.565357	0.206357	0.0867102	0.157136	0.337771	-0.176819	0.242148	-0.10691	-0.0349797	0.0941003	0.706491	0.931757	0.619534	1	0.641942	0.587264	0.511393	0.624215	0.705752	0.0133185	0.0788469	0.189186	0.151496	0.21111	0.257175	0.138441	0.135238	0.18352	0.350782	0.39357
DHA	0.0243933	0.0877171	0.0887027	0.13404	-0.372059	0.138968	0.351115	0.0648023	0.208944	-0.0303068	0.0258716	0.142118	0.35555	0.102321	-0.0523786	-0.0772643	-0.0263644	0.05755	0.0574245	0.338632	-0.115096	-0.160897	0.0283531	0.553638	-0.23742	-0.0709622	-0.147591	-0.252803	-0.135518	0.492054	0.625924	0.627572	0.641942	1	0.307256	0.345694	0.398177	0.497474	-0.107685	0.179667	0.0305532	0.108414	0.0724406	-0.120241	0.301589	0.184551	0.307749	-0.0357275	0.460079
Linoleic.acid	-0.147783	-0.106404	0.0541872	-0.00689655	-0.124631	0.169458	0.0571429	-0.145813	0.126601	0.105911	-0.179803	0.240266	0.19064	-0.0409624	-0.0569176	-0.10101	-0.0635468	0.092046	0.0613452	0.338753	0.1424	0.188177	0.234381	0.048071	-0.00197263	0.197044	-0.0778325	0.121675	0.062069	0.888177	0.676192	0.740394	0.587264	0.307256	1	0.930049	0.755172	0.880788	0.190876	0.144371	0.24335	0.157635	0.434483	0.394089	0.118719	0.0581281	0.0512315	0.297044	0.33477
MUFA	-0.0955665	-0.0640394	0.0256158	0.0428571	-0.079803	0.126601	0.224631	-0.0990148	0.129557	0.26798	-0.00935961	0.224988	0.176847	0.0305984	-0.0320315	-0.0889382	-0.183744	-0.0168256	-0.0246366	0.282828	-0.0118256	0.151724	0.186815	0.123012	-0.13981	0.170936	-0.139409	0.118719	0.0123153	0.849754	0.676684	0.795074	0.511393	0.345694	0.930049	1	0.845813	0.84532	0.130703	0.314117	0.222167	0.1	0.453695	0.332512	0.0758621	0.0320197	0.0408867	0.29064	0.284518
Oleic.acid	-0.10197	-0.0699507	-0.0896552	0.184236	-0.0413793	0.200493	0.291626	-0.0945813	0.264532	0.20197	0.0157635	0.326516	0.34335	0.106848	-0.0317851	-0.104459	-0.1	0.0274653	-0.0751417	0.268785	-0.027593	0.020197	0.0729513	0.118822	-0.255949	0.163547	-0.044335	0.269951	0.198522	0.812808	0.759453	0.737931	0.624215	0.398177	0.755172	0.845813	1	0.816256	0.107522	0.436807	0.219704	-0.0157635	0.381281	0.319212	0.0226601	0.104433	0.00837438	0.433498	0.167755
SFA	-0.000492611	0.0187192	0.00394089	0.0458128	-0.131527	0.20197	0.269458	-0.232512	0.133005	0.0827586	-0.000492611	0.384426	0.343842	0.0552746	0.00172478	-0.0448386	-0.0975369	0.0952627	-0.0694752	0.407243	-0.0335058	0.122167	0.143192	0.0848022	-0.0774258	0.227586	0.0108374	0.0374384	0.0261084	0.999507	0.77448	0.763547	0.705752	0.497474	0.880788	0.84532	0.816256	1	0.179532	0.305987	0.309852	0.196059	0.475369	0.263054	0.13399	0.0241379	0.0487685	0.238424	0.306688
Choline	0.063132	-0.177312	0.219236	-0.108261	0.129223	0.175339	-0.170407	-0.257707	0.217756	0.116153	-0.190629	0.25697	0.114427	0.167881	0.134205	0.0552541	0.246609	0.270037	0.00777011	-0.201776	0.0749877	0.132676	0.116101	-0.264717	0.217504	0.105795	0.30111	0.283354	0.111714	0.177559	0.085214	0.0527744	0.0133185	-0.107685	0.190876	0.130703	0.107522	0.179532	1	-0.100641	0.0535142	-0.0949446	-0.00394575	0.0786684	-0.067571	-0.110234	-0.0532676	0.252035	0.12554
Lysophosphatidylcholine	0.378911	0.122937	0.292437	-0.0995319	0.101256	-0.23528	0.635625	-0.0305494	-0.231831	0.0253757	0.377679	0.22529	0.105937	0.0561521	0.0335182	0.04448	-0.25967	-0.054078	-0.403894	-0.0377033	-0.459586	-0.40478	-0.0266239	0.090741	-0.394253	0.151515	0.0869672	0.171717	-0.0776053	0.30303	0.274732	0.42646	0.0788469	0.179667	0.144371	0.314117	0.436807	0.305987	-0.100641	1	0.137226	-0.298349	0.165558	-0.0721853	-0.0135501	-0.0179847	-0.0246366	0.0372013	0.000985586
X3.Hydroxybutyrate	-0.113793	-0.244335	0.124631	-0.053202	-0.0236453	0.0812808	0.153202	-0.33399	-0.000985222	0.238916	0.008867	0.214638	0.212315	-0.28575	-0.339042	-0.358216	-0.587192	-0.367689	-0.40675	-0.20473	-0.160877	-0.245813	-0.420949	-0.479231	-0.206633	-0.0788177	-0.13202	0.0857143	0.332512	0.3133	0.117009	0.174877	0.189186	0.0305532	0.24335	0.222167	0.219704	0.309852	0.0535142	0.137226	1	0.3133	0.90936	0.676355	-0.270936	0.406897	-0.350739	-0.0866995	-0.33477
Acetate	-0.0216749	0.0507389	-0.0871921	0.235468	-0.460591	0.0650246	-0.229064	0.14532	0.104926	0.229557	-0.0128079	0.346969	0.100985	-0.164837	-0.0953554	-0.110618	-0.155665	-0.0771999	0.201281	0.417344	0.326928	0.17734	-0.141466	-0.383336	0.235236	0.218227	0.142365	0.0137931	0.129557	0.203448	0.0490208	0.0374384	0.151496	0.108414	0.157635	0.1	-0.0157635	0.196059	-0.0949446	-0.298349	0.3133	1	0.38867	0.418719	-0.00689655	-0.10197	0.0334975	-0.205911	0.00369504
Acetoacetate	-0.148276	-0.202463	0.0275862	0.00640394	-0.0403941	0.120197	0.175862	-0.313793	0.0793103	0.372906	-0.0172414	0.230902	0.254187	-0.232696	-0.28311	-0.334319	-0.631527	-0.385504	-0.376201	-0.0643016	-0.111111	-0.130542	-0.361553	-0.384815	-0.15929	0.00935961	-0.192118	0.0458128	0.263054	0.478818	0.191157	0.311823	0.21111	0.0724406	0.434483	0.453695	0.381281	0.475369	-0.00394575	0.165558	0.90936	0.38867	1	0.706404	-0.229557	0.2867	-0.338424	-0.0945813	-0.290923
Acetone	-0.23202	-0.54532	0.20936	-0.0300493	-0.0561576	0.0187192	-0.202956	-0.0211823	0.0881773	0.259113	-0.234975	0.220552	0.0103448	-0.257866	-0.30972	-0.312392	-0.396059	-0.2509	-0.10914	-0.110372	0.293668	0.0192118	-0.288355	-0.466166	0.14055	0.182266	-0.111823	0.29803	0.461084	0.269458	0.18081	0.0950739	0.257175	-0.120241	0.394089	0.332512	0.319212	0.263054	0.0786684	-0.0721853	0.676355	0.418719	0.706404	1	-0.173892	0.295074	-0.212808	0.0650246	-0.128341
C0	0.374384	0.144335	-0.170936	0.101478	0.136946	0.184236	-0.196552	0.431527	0.249261	-0.00935961	-0.0561576	0.228438	0.127586	0.0412092	0.0409018	0.114068	0.218719	0.0502294	0.371274	0.334812	0.127864	0.017734	0.278004	0.189079	0.445075	0.224138	0.0704433	0.123153	-0.000985222	0.130049	0.111344	0.0517241	0.138441	0.301589	0.118719	0.0758621	0.0226601	0.13399	-0.067571	-0.0135501	-0.270936	-0.00689655	-0.229557	-0.173892	1	0.42266	0.788177	0.125616	0.677423
C2.0	0.166502	-0.0876847	-0.0738916	0.0802956	0.0847291	0.331527	-0.133005	0.259113	0.281773	0.0625616	-0.208374	0.145638	0.241379	-0.189019	-0.251324	-0.256221	-0.137931	-0.182113	0.137719	-0.11998	0.010101	-0.0339901	-0.101047	0.00320473	0.042165	-0.091133	-0.159606	0.164532	0.425616	0.0167488	0.0729154	0.0482759	0.135238	0.184551	0.0581281	0.0320197	0.104433	0.0241379	-0.110234	-0.0179847	0.406897	-0.10197	0.2867	0.295074	0.42266	1	0.318227	0.0950739	0.221949
C3.0	0.287685	0.238916	-0.243842	0.270936	-0.0305419	0.247291	-0.194581	0.538916	0.324138	-0.116749	0.117734	0.0241498	0.171921	0.180383	0.230873	0.321261	0.274877	0.225661	0.400591	0.423996	0.206701	0.0497537	0.408626	0.317022	0.38269	0.355665	-0.0280788	0.037931	-0.244335	0.0453202	0.190664	0.168473	0.18352	0.307749	0.0512315	0.0408867	0.00837438	0.0487685	-0.0532676	-0.0246366	-0.350739	0.0334975	-0.338424	-0.212808	0.788177	0.318227	1	0.0665025	0.713142
C5.DC	-0.204433	0.18867	-0.14335	0.0640394	0.0985222	0.193596	-0.176355	0.0197044	0.135468	0.0211823	-0.24335	0.304091	0.368473	0.353856	0.189479	0.184035	0.428571	0.198196	0.283567	0.254003	0.150283	0.19803	0.138016	0.0801184	-0.0214524	0.369458	0.260591	0.346798	0.3	0.241872	0.449316	0.307389	0.350782	-0.0357275	0.297044	0.29064	0.433498	0.238424	0.252035	0.0372013	-0.0866995	-0.205911	-0.0945813	0.0650246	0.125616	0.0950739	0.0665025	1	0.135731
C5.OH	0.245597	0.06454	0.103461	0.0160118	-0.116763	0.112083	-0.131543	0.446114	0.099766	0.0120705	0.0137948	0.205176	0.0862175	0.250988	0.293248	0.317605	0.393891	0.449893	0.513983	0.441173	0.146975	0.249292	0.646044	0.475962	0.358447	0.194852	0.0199532	-0.0182288	-0.226136	0.306688	0.452082	0.330583	0.39357	0.460079	0.33477	0.284518	0.167755	0.306688	0.12554	0.000985586	-0.33477	0.00369504	-0.290923	-0.128341	0.677423	0.221949	0.713142	0.135731	1
C4.0.iso	0.195567	0.152217	-0.272414	0.127586	0.0251232	0.192118	-0.0192118	0.194581	0.282759	0.0862069	0.0561576	0.308773	0.310837	0.147317	0.193175	0.162355	0.368966	0.223682	0.179355	0.446662	0.184775	0.0783251	0.0347505	0.239616	0.243867	0.261084	0.289655	0.0980296	-0.17931	0.226108	0.246582	0.0630542	0.264565	0.342491	0.0384236	0.0118227	0.135468	0.236453	-0.0310728	-0.0566642	-0.27931	0.21133	-0.169458	-0.172414	0.529557	0.1	0.567488	0.0596059	0.394384
C4.0	0.313793	0.227094	-0.179803	-0.0625616	0.0157635	0.203941	-0.035468	0.110345	0.160591	-0.08867	-0.106404	0.362247	0.379803	0.0204812	0.0204509	0.0428677	0.202956	0.107387	0.18305	0.382853	0.110372	-0.0334975	0.102773	0.0912117	0.162495	0.226108	0.182266	0.260099	0.227094	0.481773	0.46385	0.303448	0.487991	0.388321	0.336946	0.236453	0.365517	0.486207	0.110728	0.0987928	0.140394	0.100493	0.104433	0.0433498	0.597537	0.50936	0.495074	0.31133	0.462865
C5.M.DC	0.0689655	-0.0931034	-0.0669951	-0.00788177	0.227586	-0.0182266	0.181281	-0.191133	0.114286	0.0364532	-0.100493	-0.000246427	-0.0231527	-0.242567	-0.48614	-0.419315	-0.158128	-0.358781	-0.331116	-0.0564178	-0.135994	-0.146305	-0.3374	-0.251202	-0.324744	-0.0630542	-0.0842365	0.358621	0.522167	0.158128	0.210371	0.157143	0.183766	-0.0650487	0.210837	0.22069	0.349754	0.156158	0.223181	0.209904	0.259606	-0.211823	0.149754	0.229557	-0.000492611	0.179803	-0.153695	0.381773	-0.194605
C5.1	0.0823675	0.0246609	0.0251541	0.0577066	0.068804	0.249569	-0.345993	0.399014	0.238964	0.0991369	-0.0579532	0.0879596	0.0811345	0.26152	0.405699	0.368648	0.426141	0.509355	0.547608	0.297484	0.242477	0.401727	0.69525	0.319758	0.501913	0.054254	-0.124291	-0.0739828	-0.323551	0.151418	0.265384	0.148212	0.190529	0.150364	0.280641	0.199754	0.0290999	0.148459	0.361111	-0.322768	-0.374353	-0.0532676	-0.33169	-0.148952	0.545746	0.166461	0.62984	0.206905	0.810458
C4.0.2M	0.415815	0.120458	-0.0354723	-0.0273433	0.117748	-0.0785811	-0.0601059	0.48602	0.0973026	0.339204	0.170464	0.307209	0.0421234	0.13808	0.16757	0.213133	0.0192142	0.0515967	0.272761	0.379943	0.114082	0.0899126	0.345206	0.0451184	0.505919	0.220471	-0.00468038	0.176869	-0.162582	0.306195	0.293668	0.131543	0.230352	0.243716	0.235251	0.265304	0.231063	0.306688	0.0496979	-0.00258716	-0.113807	0.299791	-0.0167508	0.0642936	0.654514	0.155438	0.654514	0.0913906	0.643508
C5.0	0.415815	0.120458	-0.0354723	-0.0273433	0.117748	-0.0785811	-0.0601059	0.48602	0.0973026	0.339204	0.170464	0.307209	0.0421234	0.13808	0.16757	0.213133	0.0192142	0.0515967	0.272761	0.379943	0.114082	0.0899126	0.345206	0.0451184	0.505919	0.220471	-0.00468038	0.176869	-0.162582	0.306195	0.293668	0.131543	0.230352	0.243716	0.235251	0.265304	0.231063	0.306688	0.0496979	-0.00258716	-0.113807	0.299791	-0.0167508	0.0642936	0.654514	0.155438	0.654514	0.0913906	0.643508
C6.0	0.148805	0.0980537	-0.244149	0.262626	0.0529687	0.298349	0.183543	0.117517	0.358709	0.207194	-0.08746	0.350136	0.429909	-0.0441812	-0.166975	-0.234968	-0.369056	-0.220024	-0.128512	-0.103006	-0.278709	-0.132791	-0.0362381	-0.0654667	-0.142064	-0.0672579	-0.124169	0.0953437	0.335058	0.259916	0.153505	0.272235	0.132561	0.311645	0.118256	0.198571	0.382114	0.270264	-0.0550074	0.303721	0.475733	-0.10372	0.443213	0.118009	0.17492	0.640059	0.123922	0.0736635	0.0630775
C8.1	-0.00344828	0.3133	-0.462562	0.33399	-0.144828	0.247783	-0.146305	0.341872	0.296552	-0.132512	0.258128	-0.132824	0.0950739	-0.0333128	0.140446	0.244149	0.0596059	0.0888293	0.252033	0.465386	0.136487	-0.0226601	0.365003	0.199433	0.137098	-0.00738916	-0.285714	-0.127094	-0.288177	0.0536946	0.121444	0.082266	0.223919	0.232352	-0.0182266	-0.0325123	-0.00492611	0.0546798	-0.386437	-0.174674	-0.103448	0.169458	-0.112808	-0.264039	0.434483	0.200985	0.606404	-0.13202	0.275896
C8.0	-0.212834	-0.0867102	-0.24338	0.34216	-0.146816	0.501786	-0.0923759	-0.0756251	0.370982	0.0135485	-0.335756	0.209858	0.403744	0.0778629	-0.0210695	-0.178145	-0.183027	-0.0768382	0.00579032	-0.23728	-0.0192189	0.112822	0.05965	-0.105769	-0.0805179	-0.00936076	-0.161596	-0.00221702	0.360882	0.175391	0.0160138	0.198054	0.00184775	0.084278	0.152728	0.199286	0.348565	0.184752	0.0961895	0.190957	0.368765	-0.229585	0.358172	0.170957	-0.0492672	0.495874	-0.0807981	0.099027	-0.045085
C10.1	-0.0945813	0.0428571	-0.317241	0.246305	0.0300493	0.480788	-0.231527	-0.0482759	0.271921	0.118719	-0.28867	0.209216	0.317241	0.12881	0.131822	-0.0330131	-0.0438424	0.0866024	0.127864	-0.181818	0.0283321	0.43202	0.229452	-0.115124	0.145975	0.0241379	-0.0896552	-0.0960591	0.183744	0.169458	-0.0453258	0.104433	-0.123168	-0.15794	0.174384	0.180296	0.193596	0.177833	0.229347	-0.0290712	0.211823	-0.201478	0.238424	0.0182266	-0.0630542	0.371921	-0.026601	0.139409	0.0421234
C10.0	-0.234975	-0.0137931	-0.23399	0.34532	-0.191626	0.522167	-0.0679803	-0.08867	0.380788	0.0162562	-0.297537	0.205274	0.405911	0.156447	0.0522361	-0.117763	-0.0916256	0.00742306	0.0672579	-0.190687	-0.045085	0.167488	0.145656	-0.0473315	-0.113673	-0.0408867	-0.127094	-0.0157635	0.325616	0.185222	0.0620766	0.207389	0.0426161	0.11211	0.146798	0.19803	0.360099	0.195074	0.150432	0.14511	0.315271	-0.236453	0.303448	0.0985222	-0.115271	0.430049	-0.130542	0.134975	-0.0261116
C12.0.OH.a	-0.168514	0.0559251	-0.194629	0.38236	-0.173934	0.64474	-0.338507	-0.0470559	0.373491	-0.0615915	-0.22099	0.191521	0.257945	0.137357	0.168577	-0.0333908	0.179847	0.232152	0.347955	-0.184327	0.100665	0.458487	0.300629	-0.155591	0.175114	-0.027593	0.0677507	-0.130574	0.175905	0.0243902	-0.138844	0.00566642	-0.149563	-0.0751694	0.0490269	0.0189702	-0.00172456	0.030303	0.392329	-0.225973	0.0985464	-0.0795763	0.0110865	-0.106184	-0.0428677	0.307465	-0.0271003	0.0507514	0.0813108
C12.0.OH.b	0.0394089	0.153202	-0.212315	0.403941	0.064532	0.607389	-0.256158	0.203941	0.490148	0.0876847	-0.120197	0.308773	0.290148	0.170512	0.111125	-0.0293176	0.0615764	0.122975	0.329145	-0.129342	0.00271003	0.371921	0.273568	-0.184149	0.279867	0.166502	0.0990148	0.0187192	0.311823	0.008867	-0.0795664	-0.0305419	-0.0812908	-0.057164	-0.00147783	-0.00295567	0.0438424	0.0167488	0.328484	-0.153486	0.168966	-0.08867	0.108374	0.035468	0.171429	0.497537	0.147291	0.173892	0.154206
C12.1	-0.110837	0.0714286	-0.202463	0.283744	0.00295567	0.553202	-0.16601	-0.0403941	0.351724	0.154187	-0.138916	0.206999	0.262069	0.222332	0.196871	-0.00468096	0.0615764	0.185824	0.270756	-0.194383	-0.0640552	0.417241	0.328281	-0.0364847	0.0648502	-0.0778325	-0.0162562	-0.064532	0.217241	0.14335	0.00886809	0.10936	-0.0692203	-0.029814	0.161084	0.214778	0.217734	0.151232	0.396794	-0.109387	0.145813	-0.191133	0.150246	-0.0374384	-0.0605911	0.336946	-0.104926	0.167488	0.103461
C14.2	-0.102463	-0.0458128	-0.193103	0.244335	-0.0364532	0.49803	-0.230542	-0.144335	0.176847	0.137931	-0.158128	0.198374	0.268473	0.1905	0.18874	0.000246366	-0.00837438	0.149451	0.22912	-0.239221	-0.0261148	0.429557	0.261245	-0.153334	0.156578	-0.0610837	-0.008867	-0.121182	0.141872	0.151232	-0.0748861	0.0650246	-0.149279	-0.125662	0.189163	0.203448	0.124138	0.157635	0.361776	-0.144124	0.26601	-0.0477833	0.237438	0.0788177	-0.0605911	0.341379	-0.0546798	0.0753695	0.142628
C12.0	-0.212808	0.0182266	-0.237438	0.313793	-0.118227	0.536946	-0.12069	-0.108374	0.327586	0.124138	-0.178325	0.105717	0.282759	0.240839	0.106443	-0.059867	-0.0300493	0.0578999	0.171964	-0.196847	-0.0421286	0.282759	0.198152	-0.0833231	-0.100604	-0.037931	-0.102956	-0.017734	0.298522	0.172906	0.0569036	0.198522	-0.0100998	-0.00394234	0.208374	0.291626	0.339901	0.180296	0.310728	0.0327667	0.281773	-0.226108	0.262562	0.0916256	-0.133498	0.390148	-0.110837	0.19064	0.0234019
C14.0.OH	-0.00837542	0.0238946	-0.143614	0.249292	0.137948	0.376647	-0.337234	0.401527	0.29782	0.231309	-0.16135	0.261614	0.0662643	0.0674976	0.0510104	-0.0542072	-0.00492672	0.0223957	0.342614	-0.155476	0.0239005	0.407932	0.248459	-0.258013	0.266215	-0.0147801	-0.0729154	0.00418771	0.301761	-0.140411	-0.161616	-0.19362	-0.155703	-0.195047	-0.0539475	-0.0537012	-0.0487745	-0.139426	0.113824	-0.245164	0.171203	-0.0746397	0.0551792	0.116763	0.182781	0.575687	0.126863	0.17884	0.168514
C14.1	-0.126108	-0.111823	-0.146798	0.300493	0.00837438	0.464039	-0.0876847	0.00295567	0.370936	0.290148	-0.10197	0.181617	0.220197	0.0846393	-0.0364667	-0.178369	-0.210837	-0.122233	0.11185	-0.262626	-0.113328	0.212808	0.147381	-0.212992	0.00961658	-0.13202	-0.148276	0.0935961	0.347291	0.16798	0.00517305	0.126601	-0.0458185	-0.0211901	0.205911	0.293103	0.336453	0.173399	0.230826	0.0214339	0.430049	-0.10936	0.4	0.274384	-0.0433498	0.507389	-0.109852	0.0975369	0.0509915
C14.0	-0.103448	0.0285714	-0.168966	0.242857	-0.0876847	0.4	-0.0285714	-0.0137931	0.264532	0.246305	0.0261084	0.103746	0.223153	0.213202	0.0505113	0.00221729	-0.225123	-0.108377	0.157921	-0.0440995	-0.105198	0.103448	0.15724	-0.133613	-0.0818642	0.0364532	-0.148276	0.102463	0.296552	0.337438	0.197315	0.298522	0.15667	0.095109	0.364039	0.476847	0.473892	0.340887	0.14254	0.102981	0.470936	-0.00640394	0.487685	0.323153	0.0246305	0.45468	0.000985222	0.173892	0.105185
C16.1	-0.063801	-0.143121	-0.201749	0.227614	0.106171	0.335509	-0.0586279	-0.0125631	0.33748	0.353492	0.0753787	0.158842	0.0913906	-0.0061698	-0.113356	-0.162498	-0.246582	-0.156151	0.0751509	-0.145251	-0.123814	0.0453258	0.129776	-0.24926	0.0123305	-0.119473	-0.0896662	0.231063	0.34758	0.236975	0.0756344	0.113068	0.0719389	0.014416	0.267521	0.35226	0.361128	0.240424	0.206561	-0.0372059	0.472965	0.0379357	0.45375	0.34487	0.0899126	0.443404	-0.0174898	0.0620766	0.105691
C16.0.OH	0.408935	-0.00296151	-0.0214709	0.0686082	0.265302	0.148322	0.0296151	0.183613	0.107108	0.145607	0.192745	0.244445	0.0362785	-0.0304117	-0.0567832	0.0257961	-0.136229	0.00347094	0.0506049	0.0878797	-0.146507	-0.0241856	0.275219	-0.21613	0.225571	0.154245	0.0125864	0.287266	0.165104	0.296397	0.155375	0.0853901	0.142417	-0.0627084	0.28924	0.259132	0.246299	0.30084	0.0838893	0.246236	0.323298	-0.0587365	0.28085	0.25543	0.475322	0.506664	0.38006	0.0656467	0.399606
C18.2	0.068235	-0.10888	-0.140658	0.0936076	0.178593	0.195837	-0.44168	0.270477	0.144599	0.235251	-0.0928686	0.258041	-0.030792	-0.0288747	-0.00911779	-0.025502	-0.160365	-0.118289	0.277935	-0.110386	0.194407	0.183766	0.209391	-0.472387	0.64402	0.182535	0.0224166	0.0945929	0.170711	0.0118241	-0.239468	-0.260131	-0.160877	-0.231764	0.063062	-0.00246336	-0.115778	0.00985343	0.0753484	-0.300727	0.295603	0.233773	0.252987	0.317527	0.427146	0.41409	0.300283	-0.0349797	0.242424
C16.0	0.245104	0.00197069	-0.166277	0.29043	0.00862175	0.344624	-0.000492672	0.151004	0.263826	0.0832615	0.279837	0.128281	0.19633	0.0845263	0.0555692	0.119379	-0.183027	0.0456575	0.207096	0.180609	-0.108414	0.0179825	0.202366	0.00604044	0.137238	0.0771031	-0.0729154	0.0495135	0.129819	0.378372	0.264844	0.228846	0.305987	0.275998	0.298066	0.316788	0.318019	0.385762	0.00036996	0.0330171	0.333292	0.225397	0.335017	0.271216	0.385023	0.471487	0.392167	-0.105678	0.423011
C18.1	-0.15125	-0.258406	-0.068235	0.23057	-0.00960709	0.314324	-0.367533	0.256682	0.446114	0.309398	-0.232541	0.322489	0.0923759	-0.172754	-0.2293	-0.245164	-0.291908	-0.293742	0.175311	-0.0965874	0.204016	0.0852322	0.00838058	-0.456238	0.361652	0.0807981	-0.0906516	0.263579	0.457938	0.120458	-0.0603597	-0.0620766	0.0623306	-0.0289552	0.170957	0.146816	0.167016	0.11898	0.0204711	-0.200074	0.517059	0.274911	0.50893	0.583323	0.228846	0.531593	0.037443	0.0270969	0.0418822
C18.0	0.233498	-0.0128079	0.0438424	0.323645	-0.0182266	0.240887	-0.107882	0.251724	0.32266	0.161084	0.0502463	0.296205	0.200985	0.0417027	0.0224221	0.0635625	-0.213793	-0.00296923	0.257206	0.162848	-0.0463168	-0.0172414	0.278004	-0.150129	0.345704	0.0955665	-0.0330049	0.0674877	0.0527094	0.370443	0.131543	0.283744	0.115039	0.252064	0.375862	0.365517	0.241872	0.36798	0.137115	0.0694752	0.153202	0.273892	0.219212	0.177833	0.488177	0.179803	0.347783	-0.035468	0.441187
Total.cholesterol	-0.0970443	0.262069	0.0428571	0.0610837	0.000985222	0.0536946	0.159113	-0.22069	-0.171429	-0.208867	0.26798	-0.187284	0.10936	0.307959	0.369841	0.403055	0.246798	0.407526	0.154964	0.210643	-0.217049	0.0561576	0.31719	0.371503	-0.214524	0.0876847	0.153202	-0.233498	-0.409852	0.240394	0.224658	0.42266	0.0842468	0.0630775	0.323153	0.315764	0.0857143	0.231527	0.0734896	0.101749	-0.273399	-0.128079	-0.198522	-0.325123	-0.125616	-0.42069	0.000985222	0.178325	0.185244
VLDL.cholesterol	0.103448	0.270936	-0.20936	0.292611	-0.0310345	0.294089	0.327586	-0.134483	0.0901478	-0.144828	0.274877	0.0576639	0.358621	0.114004	0.223728	0.244642	-0.103448	0.133615	-0.0946046	0.293176	-0.332102	-0.0285714	0.117067	0.159251	-0.387869	0.0743842	-0.0679803	-0.0940887	-0.205911	0.502463	0.322454	0.540394	0.207168	0.180116	0.472414	0.528571	0.46601	0.504433	-0.133909	0.431387	0.106404	-0.0330049	0.19064	-0.128571	0.0876847	0.0871921	0.187192	0.091133	0.0724227
LDL.cholesterol	-0.0216749	0.302463	-0.122167	0.212808	0.121675	0.135468	0.261084	-0.248276	-0.145813	-0.265025	0.35665	-0.214145	0.272414	0.338804	0.396698	0.455777	0.0960591	0.226651	-0.0583888	0.131313	-0.39049	0.026601	0.0714726	0.258351	-0.343238	0.142857	0.0812808	-0.229557	-0.373892	0.0980296	0.0894199	0.313793	-0.0677423	-0.111618	0.139409	0.187192	0.0610837	0.0935961	-0.0404439	0.231338	-0.15468	-0.156158	-0.135468	-0.271429	-0.163547	-0.283251	0.0527094	0.233498	-0.0263579
HDL.cholesterol	-0.20197	0.0103448	0.207389	-0.140394	-0.109852	-0.0758621	-0.0788177	-0.0857143	0.0596059	0.0157635	-0.118719	-0.107935	-0.0842365	0.257866	0.127633	0.155703	0.280296	0.281829	0.205962	0.226164	0.221483	-0.00147783	0.266174	0.190805	0.119837	0.222167	0.154187	0.026601	-0.107389	0.298522	0.294618	0.306404	0.268999	0.184797	0.369458	0.302956	0.182266	0.289163	0.343527	-0.0537078	-0.265025	-0.0576355	-0.100985	-0.00640394	-0.055665	-0.487192	-0.0600985	0.126601	0.241163
Tot..ester..chol.	-0.112808	0.255172	0.0487685	0.0650246	-0.0142857	0.0541872	0.135468	-0.215764	-0.168966	-0.226108	0.270936	-0.216609	0.0699507	0.32005	0.367624	0.400838	0.268473	0.414454	0.175413	0.202267	-0.183543	0.0665025	0.337153	0.354246	-0.190359	0.115764	0.163054	-0.223645	-0.400493	0.218719	0.21111	0.404433	0.0748861	0.0413946	0.3133	0.304433	0.0724138	0.20936	0.101603	0.0864745	-0.295074	-0.134483	-0.226601	-0.318719	-0.136946	-0.447783	0.0044335	0.170936	0.189925
Total.free.cholesterol	-0.0512315	0.272414	0.00295567	0.136946	-0.008867	0.128079	0.24335	-0.219704	-0.0975369	-0.181773	0.328571	-0.168556	0.171429	0.269957	0.352347	0.393447	0.152709	0.319687	0.082779	0.236265	-0.301059	0.0142857	0.241282	0.345125	-0.315374	0.0384236	0.0871921	-0.214778	-0.414286	0.301478	0.231063	0.46601	0.0884345	0.100283	0.361576	0.390148	0.178818	0.295074	-0.0103576	0.203745	-0.19064	-0.104926	-0.102463	-0.304926	-0.0842365	-0.314778	0.0270936	0.125616	0.129819
Apolipopr.B	0.0044335	0.293103	-0.190148	0.317734	-0.0108374	0.266502	0.185714	-0.232512	-0.0827586	-0.268473	0.26601	-0.0892065	0.319212	0.220852	0.312924	0.344913	0.0211823	0.172957	0.0231584	0.177137	-0.32816	0.104926	0.0840419	0.150623	-0.306498	0.0852217	0.0438424	-0.227586	-0.266502	0.227094	0.0886809	0.351232	-0.0371967	-0.0662807	0.267488	0.296552	0.151724	0.225123	-0.133169	0.217541	-0.0408867	-0.0231527	-0.0103448	-0.215764	-0.0669951	-0.116256	0.0576355	0.169458	-0.0216775
Apolipopr.A1	-0.198522	-0.035468	0.260099	-0.100985	-0.0610837	-0.0536946	0.0753695	-0.124138	0.0453202	0.0600985	-0.0458128	-0.0598817	-0.017734	0.328687	0.185537	0.148805	0.323153	0.384762	0.181572	0.154964	0.0837645	-0.0630542	0.276032	0.27117	-0.0535076	0.0807882	0.187685	0.046798	-0.129557	0.321182	0.350289	0.354187	0.269245	0.236048	0.382266	0.357635	0.307882	0.314778	0.352898	0.082779	-0.296552	-0.192118	-0.146798	-0.0615764	-0.115271	-0.451724	-0.128079	0.167488	0.249045
Total.lipopr.prtcs	-0.246798	0.020197	0.207389	-0.0359606	-0.00147783	-0.0246305	0.138424	-0.228079	-0.0955665	-0.0891626	0.0221675	-0.141695	0.064532	0.454041	0.308735	0.274452	0.359606	0.455776	0.172949	0.104952	-0.0559251	-0.0280788	0.299446	0.332799	-0.159043	0.0773399	0.192118	-0.062069	-0.22069	0.266995	0.326149	0.357143	0.208646	0.125662	0.357635	0.33202	0.276847	0.260591	0.276696	0.106184	-0.334483	-0.306897	-0.234483	-0.139409	-0.199507	-0.479803	-0.148276	0.302463	0.209139
VLDL.prtcs	0.0926108	0.163054	-0.161084	0.231034	0.0768473	0.219704	0.4	-0.206404	0.0300493	-0.128571	0.272906	0.114096	0.321182	0.141641	0.217075	0.229613	-0.0990148	0.126934	-0.172949	0.228381	-0.38236	-0.0783251	0.0818238	0.13312	-0.409321	0.0487685	-0.0216749	-0.0270936	-0.165025	0.54335	0.343146	0.482759	0.2286	0.143649	0.483744	0.546798	0.561576	0.547783	-0.139088	0.515891	0.0802956	-0.138916	0.178818	-0.0980296	0.0768473	0.0251232	0.0738916	0.149754	0.0224166
LDL.prtcs	0.0197044	0.27734	-0.225616	0.31133	0.0768473	0.263547	0.176355	-0.268966	-0.0773399	-0.248768	0.29064	-0.064071	0.350739	0.213202	0.316127	0.350333	0.0472906	0.199433	-0.0204484	0.148559	-0.351318	0.0788177	0.0384473	0.120054	-0.314388	0.0669951	0.0862069	-0.194581	-0.245813	0.17734	0.0699594	0.297044	-0.0556719	-0.116792	0.197044	0.218719	0.106897	0.175862	-0.0636252	0.18847	-0.020197	-0.035468	-0.0246305	-0.225123	-0.0783251	-0.112808	0.0566502	0.213793	-0.0490208
HDL.prtcs	-0.232512	0.0108374	0.224138	-0.0758621	0.00197044	-0.0512315	0.0896552	-0.204433	-0.0635468	-0.0458128	-0.0295567	-0.0990636	0.0275862	0.451821	0.286066	0.260902	0.367488	0.410001	0.181079	0.108401	0	-0.00344828	0.276032	0.266733	-0.0798916	0.127094	0.234483	0.00640394	-0.155172	0.262069	0.3025	0.296059	0.20372	0.0938771	0.336453	0.307389	0.274384	0.256158	0.320592	0.0744026	-0.339901	-0.271429	-0.219212	-0.0955665	-0.195074	-0.5133	-0.1867	0.312315	0.17884
Phosphoglycerides	-0.150246	0.037931	0.189163	-0.0970443	0.0512315	-0.00344828	0.288177	-0.252217	0.0044335	0.0507389	0.0975369	-0.0436176	0.082266	0.309686	0.210915	0.167775	0.277833	0.40134	0.0354767	0.19389	-0.11998	-0.123645	0.247443	0.338223	-0.292196	0.0167488	0.162562	0.037931	-0.201478	0.485714	0.476167	0.515764	0.341175	0.266847	0.526601	0.530542	0.476355	0.480788	0.296424	0.269771	-0.208867	-0.300985	-0.0576355	-0.130542	-0.108867	-0.363547	-0.124138	0.236453	0.211849
Chylomcr...prtcs	0.249754	0.0295567	0.00985222	-0.070936	-0.0374384	-0.0458128	0.204926	0.130049	0.0123153	0.0527094	-0.0512315	0.221045	0.0428571	-0.0804443	-0.0633239	-0.0312885	-0.314778	-0.0598794	-0.184282	0.185267	-0.0408968	-0.0206897	0.0998152	-0.198447	-0.0441376	0.121182	-0.187685	0.134975	0.073399	0.589163	0.376401	0.326601	0.361375	0.136996	0.529557	0.49803	0.571429	0.593103	-0.0717633	0.365115	0.315271	0.0438424	0.378818	0.275369	0.073399	0.257143	0.153202	-0.0334975	0.0985343
XL.VLDL.prtcs	0.263547	0.0926108	-0.228571	0.129064	0.0669951	0.0418719	0.321675	0.0753695	0.091133	0.0650246	0.00197044	0.185313	0.146305	0.0525602	-0.00739189	0.0160138	-0.126108	0.00470127	-0.164819	0.241439	-0.212121	-0.0349754	0.025878	-0.0239122	-0.285785	0.062069	-0.026601	0.205419	0.0931034	0.463547	0.296342	0.273892	0.229831	0.0992978	0.438424	0.473399	0.600493	0.473399	-0.161282	0.418083	0.0497537	-0.100493	0.161084	0.0773399	0.139409	0.2	0.191133	0.0906404	0.100505
L.VLDL.prtcs	0.255665	0.181773	-0.216749	0.174877	0.0364532	0.0719212	0.342365	0.0950739	0.102463	-0.0512315	0.0576355	0.0800887	0.153695	0.127576	0.0931379	0.132052	-0.0748768	0.0628486	-0.115792	0.309682	-0.234541	0.0137931	0.0731978	0.0737089	-0.295648	0.0891626	-0.0615764	0.106404	-0.000985222	0.435468	0.305949	0.289655	0.238207	0.116792	0.421182	0.449261	0.555665	0.443842	-0.172133	0.370288	-0.0719212	-0.0921182	0.0546798	0.00147783	0.111823	0.0935961	0.208867	0.0847291	0.104693
M.VLDL.prtcs	0.091133	0.279803	-0.191626	0.3	0.0157635	0.20936	0.328079	-0.107882	-0.0344828	-0.269951	0.296059	-0.00517496	0.265025	0.184578	0.282617	0.312639	-0.0650246	0.180628	-0.0716925	0.261394	-0.332348	0.0349754	0.166605	0.123999	-0.316114	0.159606	-0.0216749	-0.133498	-0.246798	0.39803	0.24338	0.4	0.139672	0.0216829	0.4	0.425123	0.381281	0.399507	-0.213317	0.374476	-0.0197044	-0.0596059	0.053202	-0.124631	0.00541872	-0.0536946	0.149261	0.122167	0.0243872
S.VLDL.prtcs	-0.0216749	0.129064	-0.160099	0.250246	0.0517241	0.25665	0.410837	-0.293103	0.00394089	-0.2	0.229557	0.0687531	0.337438	0.218878	0.237033	0.220251	-0.0694581	0.131636	-0.184775	0.153732	-0.385317	-0.112808	0.0359828	0.114631	-0.471705	0.0497537	-0.0162562	-0.0477833	-0.103448	0.464532	0.291662	0.395074	0.207168	0.0965874	0.410345	0.472414	0.545813	0.470443	-0.155364	0.511702	0.0970443	-0.222167	0.176355	-0.0625616	-0.00197044	0.0251232	-0.0384236	0.19064	-0.0842468
XS.VLDL.prtcs	0.0793103	0.119212	-0.0862069	0.180788	-0.00788177	0.228571	0.396059	-0.281281	0.0674877	0.00788177	0.28867	0.062346	0.276355	-0.0123381	0.0532216	0.0509978	-0.110345	0.0252384	-0.184282	0.13624	-0.396896	-0.115764	-0.119532	0.197707	-0.5442	-0.162069	0.00394089	-0.0591133	-0.116256	0.421182	0.256682	0.478818	0.145338	0.251324	0.350739	0.459606	0.406404	0.425616	-0.106535	0.436068	0.147783	-0.0650246	0.223153	-0.163054	-0.0118227	0.0768473	-0.0660099	-0.00935961	-0.0633083
IDL.prtcs	-0.0522167	0.31133	-0.208867	0.342857	-0.20936	0.297044	-0.00837438	-0.0679803	0.0453202	-0.21133	0.192611	-0.150074	0.159606	0.0809378	0.200813	0.22912	0.0339901	0.187309	0.215324	0.235526	-0.0911555	0.212315	0.230438	0.25909	-0.164468	0.0970443	-0.0364532	-0.297044	-0.264532	0.173399	0.0842468	0.407882	-0.00812908	0.0741653	0.266502	0.303448	0.0344828	0.169951	-0.129716	0.0224193	-0.127586	0.0955665	-0.0438424	-0.273399	-0.0142857	-0.121182	0.148768	0	0.0963173
L.LDL.prtcs	0.0630542	0.349261	-0.214778	0.304926	-0.0162562	0.236946	0.312808	-0.249754	-0.0960591	-0.208374	0.366995	-0.0608674	0.366502	0.232943	0.31588	0.332102	0.00738916	0.211557	-0.0675043	0.276916	-0.369549	0.0704433	0.0561922	0.181191	-0.363457	0.108374	0.0551724	-0.274384	-0.331527	0.321675	0.192635	0.428079	0.0517305	0.0307996	0.285714	0.314286	0.198522	0.319704	-0.122072	0.301798	0.01133	0.0344828	0.0453202	-0.228079	-0.0921182	-0.149754	0.104433	0.0935961	0.0295603
M.LDL.prtcs	-0.0137931	0.23202	-0.257143	0.358128	0.131034	0.237931	0.110345	-0.155665	-0.0423645	-0.273892	0.287192	-0.103992	0.289655	0.168538	0.251324	0.308943	0.00640394	0.0759627	-0.00443459	0.0480414	-0.320769	0.082266	-0.0362292	0.129175	-0.28973	0.0758621	0.0270936	-0.150739	-0.147291	-0.020197	-0.00468038	0.186207	-0.1143	-0.169028	0.0226601	0.0921182	0.0364532	-0.0206897	-0.146733	0.120473	-0.0778325	-0.070936	-0.119704	-0.206404	-0.0591133	-0.0581281	0.0679803	0.304433	-0.135731
S.LDL.prtcs	-0.008867	0.212808	-0.238424	0.299507	0.0995074	0.191626	0.053202	-0.22266	-0.0605911	-0.223153	0.247291	-0.204041	0.208867	0.10364	0.198596	0.274452	-0.0399015	0.0952627	0.0214339	0.0805617	-0.270756	0.0837438	0.028589	0.0660668	-0.179509	0.0295567	0.0280788	-0.195567	-0.234975	0.0635468	-0.0556719	0.210837	-0.150018	-0.189479	0.170936	0.169458	-0.0394089	0.0586207	-0.070037	-0.0374476	-0.0399015	0.0704433	-0.0325123	-0.150739	-0.0950739	-0.169458	0.0679803	0.116256	-0.0635546
XL.HDL.prtcs	-0.0374384	-0.134483	0.168473	-0.0630542	-0.278325	-0.139409	-0.283251	0.189655	0.131034	0.17931	-0.2133	0.0155249	-0.289163	-0.331894	-0.332882	-0.251293	-0.0581281	-0.129409	0.200542	0.216556	0.396403	0.0586207	0.0017252	-0.0665599	0.235976	0.00689655	-0.017734	0.0630542	0.0916256	0.184236	0.0610913	0.176355	0.116763	0.187508	0.268473	0.212808	0.0044335	0.174384	-0.0424168	-0.157921	-0.0719212	0.355665	0.0694581	0.121675	0.0970443	-0.206404	-0.0246305	-0.255665	0.125631
L.HDL.prtcs	-0.135961	-0.114286	0.186207	-0.0852217	-0.265517	-0.0935961	-0.27734	0.134483	0.15665	0.162562	-0.280788	0.00418926	-0.204433	-0.0843925	-0.168535	-0.118502	0.0453202	0.013609	0.244888	0.240946	0.423996	0.0778325	0.132594	-0.00493036	0.273209	0.141872	0.00591133	0.053202	0.0768473	0.287192	0.178593	0.250739	0.213819	0.208944	0.368966	0.3	0.135468	0.27734	0.124538	-0.119734	-0.118719	0.214778	0.0660099	0.155172	0.0566502	-0.293596	-0.0364532	-0.112315	0.205444
M.HDL.prtcs	-0.164532	-0.0339901	0.278325	-0.140394	-0.0275862	-0.0812808	0.0940887	-0.117734	0.0546798	0.0546798	-0.062069	-0.0310498	-0.0197044	0.287231	0.162375	0.129342	0.312315	0.375854	0.145602	0.141414	0.067997	-0.0931034	0.280715	0.261556	-0.048576	0.0689655	0.195567	0.08867	-0.115271	0.335468	0.36236	0.358128	0.281808	0.244179	0.38867	0.354187	0.318719	0.329064	0.379039	0.0997783	-0.287685	-0.211823	-0.143842	-0.0674877	-0.104433	-0.438424	-0.129557	0.175369	0.246089
S.HDL.prtcs	-0.162562	0.1133	0.118719	0.0349754	0.169951	0.0522167	0.313793	-0.270936	-0.126108	-0.141872	0.174384	-0.0653031	0.272414	0.582851	0.47456	0.448879	0.261084	0.383278	-0.0335058	0.0460705	-0.328652	-0.0261084	0.243007	0.274375	-0.269264	0.214286	0.186207	-0.0339901	-0.261084	0.244828	0.302747	0.350246	0.127109	-0.0263644	0.282266	0.310345	0.33202	0.240887	0.255241	0.334812	-0.182266	-0.406897	-0.137438	-0.0985222	-0.215764	-0.34532	-0.0857143	0.463054	0.131543
Creatinine	-0.362069	-0.129064	-0.187685	0.183744	-0.12069	0.481281	0.0305419	-0.289163	0.366502	0.0364532	-0.244335	0.141695	0.407882	0.23245	0.16755	0.0396649	0.260099	0.255848	0.132299	0.164326	0.00542005	0.268473	0.1252	0.345865	-0.254469	-0.102463	-0.0576355	0.00147783	0.0650246	0.471429	0.491933	0.396552	0.475921	0.364174	0.511823	0.512808	0.549754	0.480788	0.281628	-0.173442	0.026601	-0.105911	0.142365	0.0896552	0.0231527	0.192611	-0.0364532	0.397044	0.186969
Albumin	-0.153695	0.219212	0.14335	0.138916	-0.359113	0.242857	-0.34335	0.206404	0.124138	-0.268966	-0.0763547	-0.0551996	0.100493	0.500186	0.412714	0.441981	0.550739	0.539904	0.59596	0.338261	0.294654	0.258128	0.507209	0.223345	0.315868	0.353202	0.178325	-0.185714	-0.131034	-0.00394089	0.190664	0.0921182	0.254219	0.188001	0.0108374	-0.121182	-0.167488	-0.0103448	0.304809	-0.264844	-0.290148	0.0295567	-0.355172	-0.131034	0.110345	-0.157635	0.282266	0.166502	0.508683
[truncated: 54 more columns]

## Sheet: P values - Baseline
	Leptin	Insulin	Adiponectin	TNF.a	IL.6	IL.10	CRP	CD14	MCP.1	ICAM	LBP	N.Ac.glycopr	LDLox	Isoleucine	Leucine	Valine	Alanine	Phenylalanine	Glutamine	Glutamate	Glycine	Methionine	Tyrosine	Tryptophan	Betaine	Glucose	Lactate	Pyruvate	Citrate	Total.FA	PUFA	Omega.3.FA	ARA...EPA	DHA	Linoleic.acid	MUFA	Oleic.acid	SFA	Choline	Lysophosphatidylcholine	X3.Hydroxybutyrate	Acetate	Acetoacetate	Acetone	C0	C2.0	C3.0	C5.DC	C5.OH
Leptin		0.181568	0.254329	0.211965	0.099057	0.073877	0.063302	0.115722	0.327004	0.62734	0.165523	0.226123	0.358764	0.442623	0.481743	0.938326	0.373911	0.449086	0.426662	0.866003	0.024944	0.611131	0.862958	0.768236	0.556257	0.957525	0.252142	0.24673	0.825293	0.955505	0.6382	0.567057	0.32246	0.900047	0.444244	0.621917	0.598646	0.997976	0.744919	0.042659	0.556698	0.91114	0.44271	0.225851	0.045406	0.387999	0.130208	0.287434	0.19908
Insulin	0.181568		0.079889	0.417074	0.297027	0.378106	0.451957	0.357405	0.973699	0.396597	0.190437	0.654573	0.198672	0.023947	0.060654	0.042659	0.156707	0.564399	0.095102	0.002415	0.465907	0.568792	0.193784	0.300251	0.664539	0.096282	0.395156	0.349317	0.461306	0.91114	0.776184	0.444244	0.961563	0.650933	0.582757	0.741376	0.718422	0.923219	0.357482	0.525213	0.201471	0.793794	0.292206	0.002218	0.455062	0.651054	0.211965	0.327004	0.739423
Adiponectin	0.254329	0.079889		0.001598	0.785967	0.006569	0.287434	0.795754	0.010191	0.973699	0.98179	0.57295	0.126132	0.830922	0.963575	0.891025	0.438125	0.786971	0.493083	0.067517	0.479396	0.255427	0.887975	0.766293	0.782802	0.560141	0.975721	0.877029	0.358764	0.955505	0.734626	0.877029	0.934298	0.647261	0.78011	0.895064	0.64372	0.983813	0.253181	0.123701	0.519476	0.652892	0.887042	0.275723	0.375306	0.70325	0.20241	0.458178	0.593284
TNF.a	0.211965	0.417074	0.001598		0.27688	1.07e-06	0.507893	0.710823	1.15e-05	0.678834	0.586272	0.761526	0.000558	0.373711	0.590541	0.959536	0.843132	0.758633	0.150024	0.265328	0.682497	0.34134	0.736418	0.842004	0.709566	0.502968	0.877029	0.544723	0.847107	0.839161	0.964595	0.268845	0.907106	0.488176	0.971676	0.825293	0.338706	0.813447	0.576156	0.607464	0.784013	0.218833	0.973699	0.877029	0.600423	0.678834	0.155141	0.741376	0.934298
IL.6	0.099057	0.297027	0.785967	0.27688		0.247806	0.175535	0.787922	0.887042	0.145233	0.144491	0.976721	0.386577	0.259503	0.39931	0.493083	0.265449	0.384371	0.01719	0.0232	0.014768	0.342662	0.424238	0.636127	0.891936	0.264323	0.873029	0.25985	0.987859	0.486726	0.346586	0.19134	0.125413	0.046871	0.519476	0.680702	0.831231	0.496439	0.504077	0.601222	0.903097	0.011924	0.835194	0.772318	0.478706	0.662114	0.875028	0.611131	0.546376
IL.10	0.073877	0.378106	0.006569	1.07e-06	0.247806		0.118904	0.450409	1.06e-05	0.254329	0.629151	0.936292	2.28e-05	0.104404	0.17537	0.552308	0.18864	0.310784	0.029833	0.337928	0.332702	0.090908	0.397023	0.634305	0.401132	0.324437	0.96561	0.439651	0.630965	0.311792	0.675999	0.204297	0.562682	0.472175	0.37951	0.512842	0.297027	0.293406	0.362942	0.219213	0.675105	0.737534	0.534556	0.923219	0.338706	0.07894	0.1959	0.314296	0.562682
CRP	0.063302	0.451957	0.287434	0.507893	0.175535	0.118904		0.145233	0.197745	0.461306	0.001278	0.848027	0.785967	0.94126	0.578236	0.584421	0.040151	0.29115	0.000137	0.694693	2.67e-08	0.027648	0.182601	0.172188	0.000121	0.146727	0.737534	0.494814	0.107744	0.168814	0.178478	0.103042	0.555789	0.061818	0.768431	0.241395	0.124794	0.157494	0.376808	0.000211	0.427528	0.231985	0.361491	0.291008	0.30682	0.491571	0.311792	0.360126	0.496386
CD14	0.115722	0.357405	0.795754	0.710823	0.787922	0.450409	0.145233		0.429034	0.254329	0.805572	0.255737	0.219827	0.802265	0.835134	0.690932	0.803606	0.783046	0.019005	0.146999	0.130453	0.194067	0.063128	0.757565	0.037614	0.219827	0.51119	0.634599	0.737534	0.236137	0.91616	0.656575	0.97673	0.738401	0.450409	0.60934	0.62553	0.224839	0.17712	0.874998	0.076607	0.451957	0.097384	0.913151	0.01942	0.174685	0.002558	0.91919	0.01528
MCP.1	0.327004	0.973699	0.010191	1.15e-05	0.887042	1.06e-05	0.197745	0.429034		0.527828	0.281539	0.475298	0.005213	0.84185	0.480141	0.289096	0.71652	0.564399	0.366172	0.498776	0.327526	0.385158	0.971659	0.927186	0.303806	0.640065	0.931281	0.27688	0.224839	0.512842	0.762581	0.24673	0.688153	0.276698	0.512842	0.502968	0.165523	0.491571	0.256479	0.22624	0.995953	0.588033	0.682571	0.649217	0.192246	0.138648	0.086269	0.48351	0.606615
ICAM	0.62734	0.396597	0.973699	0.678834	0.145233	0.254329	0.461306	0.254329	0.527828		0.784013	0.040183	0.630965	0.576794	0.2569	0.099813	0.15051	0.231857	0.374489	0.99494	0.493895	0.867034	0.316509	0.175575	0.70767	0.2632	0.937332	0.224839	0.598646	0.660265	0.880016	0.947425	0.608402	0.875983	0.584514	0.159873	0.293406	0.669526	0.548489	0.896043	0.211965	0.230955	0.046332	0.174685	0.961567	0.747149	0.546426	0.913151	0.950448
LBP	0.165523	0.190437	0.98179	0.586272	0.144491	0.629151	0.001278	0.805572	0.281539	0.784013		0.328049	0.72987	0.44109	0.172407	0.132182	0.47234	0.510894	0.275602	0.676894	0.006044	0.15051	0.50763	0.299641	0.192645	0.835194	0.967632	0.44271	0.008753	0.99393	0.610191	0.693824	0.940352	0.894022	0.350658	0.961567	0.935315	0.997976	0.321913	0.043393	0.963589	0.947425	0.929265	0.219827	0.772318	0.27804	0.543022	0.203352	0.94338
N.Ac.glycopr	0.226123	0.654573	0.57295	0.761526	0.976721	0.936292	0.848027	0.255737	0.475298	0.040183	0.328049		0.205015	0.532324	0.711533	0.304912	0.89903	0.468878	0.837058	0.457452	0.748414	0.389902	0.900476	0.062032	0.330412	0.150682	0.009409	0.048919	0.070857	0.041308	0.164031	0.441717	0.259272	0.462091	0.209317	0.240627	0.083856	0.039493	0.178405	0.23998	0.26352	0.065175	0.228158	0.250271	0.2333	0.450957	0.90104	0.10876	0.28565
LDLox	0.358764	0.198672	0.126132	0.000558	0.386577	2.28e-05	0.785967	0.219827	0.005213	0.630965	0.72987	0.205015		0.028056	0.100618	0.311046	0.537935	0.391522	0.420675	0.250391	0.547179	0.762609	0.85199	0.37419	0.696326	0.54984	0.584514	0.70325	0.953484	0.072984	0.174206	0.013897	0.282065	0.058377	0.321883	0.358764	0.06822	0.067799	0.554488	0.584421	0.268845	0.602202	0.183319	0.957525	0.50954	0.20715	0.372519	0.049203	0.656535
Isoleucine	0.442623	0.023947	0.830922	0.373711	0.259503	0.104404	0.94126	0.802265	0.84185	0.576794	0.44109	0.532324	0.028056		4.17e-08	1.08e-06	0.011952	0.015224	0.023141	0.125805	0.74905	0.43119	0.078159	0.096844	0.969564	0.122412	0.659674	0.124398	0.057238	0.789498	0.420235	0.679206	0.667515	0.597385	0.832907	0.874799	0.581177	0.775807	0.384025	0.77234	0.132928	0.392831	0.224462	0.176843	0.831915	0.326092	0.34908	0.059673	0.189084
Leucine	0.481743	0.060654	0.963575	0.590541	0.39931	0.17537	0.578236	0.835134	0.480141	0.2569	0.172407	0.711533	0.100618	4.17e-08		8.79e-13	0.011286	5.9e-05	0.017005	0.133954	0.915112	0.293826	0.000882	0.089184	0.438584	0.177937	0.929239	0.06521	0.001342	0.988867	0.655494	0.92823	0.977227	0.787279	0.769319	0.868984	0.869983	0.992915	0.487635	0.862958	0.071987	0.622691	0.136706	0.102045	0.833151	0.188471	0.228217	0.324896	0.122615
Valine	0.938326	0.042659	0.891025	0.959536	0.493083	0.552308	0.584421	0.690932	0.289096	0.099813	0.132182	0.304912	0.311046	1.08e-06	8.79e-13		0.017612	0.002593	0.045138	0.072391	0.90104	0.499592	0.003457	0.070998	0.452889	0.110975	0.995952	0.168291	0.001602	0.823273	0.702201	0.915143	0.866986	0.690354	0.602112	0.646385	0.589704	0.817347	0.775888	0.818784	0.056382	0.567828	0.076299	0.098969	0.55574	0.179719	0.089257	0.339242	0.093169
Alanine	0.373911	0.156707	0.438125	0.843132	0.265449	0.18864	0.040151	0.803606	0.71652	0.15051	0.47234	0.89903	0.537935	0.011952	0.011286	0.017612		4.54e-05	0.000226	0.02267	0.034722	0.200535	0.020276	0.11986	0.486238	0.186854	0.005581	0.421537	0.72987	0.612923	0.505375	0.62734	0.421479	0.892015	0.743299	0.340021	0.605767	0.614717	0.197175	0.173727	0.000812	0.420046	0.000239	0.033431	0.254329	0.475518	0.148988	0.020362	0.034499
Phenylalanine	0.449086	0.564399	0.786971	0.758633	0.384371	0.310784	0.29115	0.783046	0.564399	0.231857	0.510894	0.468878	0.391522	0.015224	5.9e-05	0.002593	4.54e-05		0.005204	0.072516	0.142848	0.417145	0.000187	0.086106	0.635861	0.421629	0.220649	0.452195	0.096603	0.617599	0.099072	0.633039	0.148519	0.766826	0.634866	0.930966	0.887534	0.623031	0.156568	0.780542	0.049724	0.690599	0.038896	0.189244	0.795822	0.3444	0.239185	0.302711	0.014336
Glutamine	0.426662	0.095102	0.493083	0.150024	0.01719	0.029833	0.000137	0.019005	0.366172	0.374489	0.275602	0.837058	0.420675	0.023141	0.017005	0.045138	0.000226	0.005204		0.021437	0.000615	0.028861	0.000961	0.310308	0.007027	0.114373	0.358644	0.881003	0.766433	0.739392	0.720227	0.968635	0.609208	0.76732	0.751911	0.899055	0.698461	0.72026	0.968091	0.029789	0.028543	0.295092	0.044287	0.573045	0.047373	0.476204	0.031282	0.136046	0.004343
Glutamate	0.866003	0.002415	0.067517	0.265328	0.0232	0.337928	0.694693	0.146999	0.498776	0.99494	0.676894	0.457452	0.250391	0.125805	0.133954	0.072391	0.02267	0.072516	0.021437		0.129496	0.136401	0.086108	0.162197	0.949376	0.027709	0.768375	0.647301	0.595008	0.025614	0.002718	0.056565	0.001394	0.072353	0.072245	0.137113	0.158574	0.028333	0.293881	0.846038	0.28672	0.02429	0.740353	0.568696	0.07584	0.535298	0.021894	0.183646	0.016591
Glycine	0.024944	0.465907	0.479396	0.682497	0.014768	0.332702	2.67e-08	0.130453	0.327526	0.493895	0.006044	0.748414	0.547179	0.74905	0.915112	0.90104	0.034722	0.142848	0.000615	0.129496		0.09348	0.212774	0.405504	0.003793	0.026595	0.787871	0.442597	0.146624	0.896043	0.716419	0.740353	0.282824	0.55216	0.461194	0.951452	0.887014	0.863009	0.69905	0.012135	0.404455	0.083443	0.566094	0.122054	0.508611	0.958525	0.282004	0.436489	0.446766
Methionine	0.611131	0.568792	0.255427	0.34134	0.342662	0.090908	0.027648	0.194067	0.385158	0.867034	0.15051	0.389902	0.762609	0.43119	0.293826	0.499592	0.200535	0.417145	0.028861	0.136401	0.09348		0.067409	0.813289	0.044692	0.101892	0.638241	0.190437	0.651054	0.534556	0.597713	0.91114	0.654692	0.404396	0.328292	0.432053	0.917177	0.527828	0.492653	0.029398	0.198672	0.357405	0.499698	0.921204	0.927249	0.861047	0.797715	0.303125	0.19219
Tyrosine	0.862958	0.193784	0.887975	0.736418	0.424238	0.397023	0.182601	0.063128	0.971659	0.316509	0.50763	0.900476	0.85199	0.078159	0.000882	0.003457	0.020276	0.000187	0.000961	0.086108	0.212774	0.067409		0.067262	0.025761	0.258439	0.70213	0.520883	0.033312	0.44013	0.202301	0.304049	0.415613	0.883922	0.22103	0.33187	0.70686	0.458679	0.548669	0.890958	0.022966	0.464166	0.053962	0.129275	0.144233	0.601977	0.027749	0.475243	0.000153
Tryptophan	0.768236	0.300251	0.766293	0.842004	0.636127	0.634305	0.172188	0.757565	0.927186	0.175575	0.299641	0.062032	0.37419	0.096844	0.089184	0.070998	0.11986	0.086106	0.310308	0.162197	0.405504	0.813289	0.067262		0.186624	0.535889	0.155552	0.034232	0.016769	0.683247	0.023221	0.030383	0.073128	0.001836	0.804424	0.524956	0.539275	0.661839	0.165216	0.639693	0.00853	0.040103	0.039277	0.010808	0.325936	0.986836	0.093805	0.679506	0.009058
Betaine	0.556257	0.664539	0.782802	0.709566	0.891936	0.401132	0.000121	0.037614	0.303806	0.70767	0.192645	0.330412	0.696326	0.969564	0.438584	0.452889	0.486238	0.635861	0.007027	0.949376	0.003793	0.044692	0.025761	0.186624		0.038952	0.634221	0.677563	0.977719	0.7001	0.225516	0.180632	0.358843	0.214927	0.991897	0.469466	0.180197	0.689738	0.257043	0.034319	0.282166	0.2193	0.409168	0.467095	0.015548	0.828073	0.040468	0.912048	0.056213
Glucose	0.957525	0.096282	0.560141	0.502968	0.264323	0.324437	0.146727	0.219827	0.640065	0.2632	0.835194	0.150682	0.54984	0.122412	0.177937	0.110975	0.186854	0.421629	0.114373	0.027709	0.026595	0.101892	0.258439	0.535889	0.038952		0.057548	0.396597	0.444244	0.227884	0.211422	0.303125	0.205662	0.714518	0.305585	0.375306	0.396597	0.235094	0.584927	0.432695	0.684442	0.255427	0.961567	0.343987	0.242455	0.638241	0.05829	0.048553	0.311107
Lactate	0.252142	0.395156	0.975721	0.877029	0.873029	0.96561	0.737534	0.51119	0.931281	0.937332	0.967632	0.009409	0.584514	0.659674	0.929239	0.995952	0.005581	0.220649	0.358644	0.768375	0.787871	0.638241	0.70213	0.155552	0.634221	0.057548		0.001422	0.156707	0.969654	0.624583	0.501332	0.580957	0.444842	0.688189	0.470755	0.819365	0.955505	0.112447	0.653732	0.494814	0.461306	0.318076	0.563594	0.71652	0.408227	0.885038	0.172151	0.918173
Pyruvate	0.24673	0.349317	0.877029	0.544723	0.25985	0.439651	0.494814	0.634599	0.27688	0.224839	0.44271	0.048919	0.70325	0.124398	0.06521	0.168291	0.421537	0.452195	0.881003	0.647301	0.442597	0.190437	0.520883	0.034232	0.677563	0.396597	0.001422		0.003704	0.851085	0.977741	0.865038	0.857042	0.185798	0.529506	0.539628	0.156707	0.847107	0.136353	0.373095	0.658419	0.943387	0.813447	0.116353	0.52448	0.393719	0.845119	0.065316	0.925224
Citrate	0.825293	0.461306	0.358764	0.847107	0.987859	0.630965	0.107744	0.737534	0.224839	0.598646	0.008753	0.070857	0.953484	0.057238	0.001342	0.001602	0.72987	0.096603	0.766433	0.595008	0.146624	0.651054	0.033312	0.016769	0.977719	0.444244	0.156707	0.003704		0.905107	0.997976	0.641892	0.627297	0.483347	0.749076	0.949444	0.301899	0.893058	0.563976	0.689054	0.078	0.502968	0.167987	0.011822	0.995953	0.021341	0.201471	0.113843	0.238171
Total.FA	0.955505	0.91114	0.955505	0.839161	0.486726	0.311792	0.168814	0.236137	0.512842	0.660265	0.99393	0.041308	0.072984	0.789498	0.988867	0.823273	0.612923	0.617599	0.739392	0.025614	0.896043	0.534556	0.44013	0.683247	0.7001	0.227884	0.969654	0.851085	0.905107		7.58e-07	1.13e-06	1.84e-05	0.006703	1.29e-10	5.5e-09	8.48e-08	0	0.356803	0.110061	0.09794	0.289814	0.008596	0.157494	0.501332	0.931281	0.815419	0.206196	0.105622
PUFA	0.6382	0.776184	0.734626	0.964595	0.346586	0.675999	0.178478	0.91616	0.762581	0.880016	0.610191	0.164031	0.174206	0.420235	0.655494	0.702201	0.505375	0.099072	0.720227	0.002718	0.716419	0.597713	0.202301	0.023221	0.225516	0.211422	0.624583	0.977741	0.997976	7.58e-07		5.64e-07	2.14e-13	0.000282	5.66e-05	5.57e-05	1.78e-06	8.21e-07	0.660294	0.149211	0.545524	0.800635	0.32055	0.34792	0.565276	0.706998	0.321823	0.014477	0.013812
Omega.3.FA	0.567057	0.444244	0.877029	0.268845	0.19134	0.204297	0.103042	0.656575	0.24673	0.947425	0.693824	0.441717	0.013897	0.679206	0.92823	0.915143	0.62734	0.633039	0.968635	0.056565	0.740353	0.91114	0.304049	0.030383	0.180632	0.303125	0.501332	0.865038	0.641892	1.13e-06	5.64e-07		0.000339	0.000268	4.4e-06	2.57e-07	4.91e-06	1.45e-06	0.785709	0.021058	0.364229	0.847107	0.099619	0.623723	0.789878	0.803606	0.382328	0.104787	0.079849
ARA...EPA	0.32246	0.961563	0.934298	0.907106	0.125413	0.562682	0.555789	0.97673	0.688153	0.608402	0.940352	0.259272	0.282065	0.667515	0.977227	0.866986	0.421479	0.148519	0.609208	0.001394	0.282824	0.654692	0.415613	0.073128	0.358843	0.205662	0.580957	0.857042	0.627297	1.84e-05	2.14e-13	0.000339		0.000174	0.00081	0.004578	0.000296	1.9e-05	0.945331	0.684331	0.325658	0.432752	0.271637	0.178048	0.473873	0.484259	0.34062	0.062082	0.03466
DHA	0.900047	0.650933	0.647261	0.488176	0.046871	0.472175	0.061818	0.738401	0.276698	0.875983	0.894022	0.462091	0.058377	0.597385	0.787279	0.690354	0.892015	0.766826	0.76732	0.072353	0.55216	0.404396	0.883922	0.001836	0.214927	0.714518	0.444842	0.185798	0.483347	0.006703	0.000282	0.000268	0.000174		0.104945	0.066235	0.032412	0.006036	0.578202	0.351027	0.874983	0.575614	0.708824	0.534403	0.111848	0.337867	0.10436	0.854018	0.012031
Linoleic.acid	0.444244	0.582757	0.78011	0.971676	0.519476	0.37951	0.768431	0.450409	0.512842	0.584514	0.350658	0.209317	0.321883	0.832907	0.769319	0.602112	0.743299	0.634866	0.751911	0.072245	0.461194	0.328292	0.22103	0.804424	0.991897	0.305585	0.688189	0.529506	0.749076	1.29e-10	5.66e-05	4.4e-06	0.00081	0.104945		2.96e-13	2.2e-06	2.93e-10	0.321275	0.45495	0.203352	0.414113	0.018514	0.034401	0.539628	0.764548	0.791836	0.117623	0.075879
MUFA	0.621917	0.741376	0.895064	0.825293	0.680702	0.512842	0.241395	0.60934	0.502968	0.159873	0.961567	0.240627	0.358764	0.874799	0.868984	0.646385	0.340021	0.930966	0.899055	0.137113	0.951452	0.432053	0.33187	0.524956	0.469466	0.375306	0.470755	0.539628	0.949444	5.5e-09	5.57e-05	2.57e-07	0.004578	0.066235	2.96e-13		7.61e-09	7.92e-09	0.499165	0.097021	0.24673	0.605767	0.013436	0.078	0.695706	0.869032	0.833212	0.126132	0.134681
Oleic.acid	0.598646	0.718422	0.64372	0.338706	0.831231	0.297027	0.124794	0.62553	0.165523	0.293406	0.935315	0.083856	0.06822	0.581177	0.869983	0.589704	0.605767	0.887534	0.698461	0.158574	0.887014	0.917177	0.70686	0.539275	0.180197	0.396597	0.819365	0.156707	0.301899	8.48e-08	1.78e-06	4.91e-06	0.000296	0.032412	2.2e-06	7.61e-09		6.74e-08	0.578781	0.017826	0.252142	0.935315	0.041274	0.091435	0.907117	0.589796	0.96561	0.018812	0.38439
SFA	0.997976	0.923219	0.983813	0.813447	0.496439	0.293406	0.157494	0.224839	0.491571	0.669526	0.997976	0.039493	0.067799	0.775807	0.992915	0.817347	0.614717	0.623031	0.72026	0.028333	0.863009	0.527828	0.458679	0.661839	0.689738	0.235094	0.955505	0.847107	0.893058	0	8.21e-07	1.45e-06	1.9e-05	0.006036	2.93e-10	7.92e-09	6.74e-08		0.351397	0.106463	0.101892	0.308059	0.009157	0.167987	0.488338	0.901088	0.801641	0.212937	0.105622
Choline	0.744919	0.357482	0.253181	0.576156	0.504077	0.362942	0.376808	0.17712	0.256479	0.548489	0.321913	0.178405	0.554488	0.384025	0.487635	0.775888	0.197175	0.156568	0.968091	0.293881	0.69905	0.492653	0.548669	0.165216	0.257043	0.584927	0.112447	0.136353	0.563976	0.356803	0.660294	0.785709	0.945331	0.578202	0.321275	0.499165	0.578781	0.351397		0.603445	0.782775	0.624197	0.983793	0.685009	0.727635	0.569181	0.783753	0.187183	0.51641
Lysophosphatidylcholine	0.042659	0.525213	0.123701	0.607464	0.601222	0.219213	0.000211	0.874998	0.22624	0.896043	0.043393	0.23998	0.584421	0.77234	0.862958	0.818784	0.173727	0.780542	0.029789	0.846038	0.012135	0.029398	0.890958	0.639693	0.034319	0.432695	0.653732	0.373095	0.689054	0.110061	0.149211	0.021058	0.684331	0.351027	0.45495	0.097021	0.017826	0.106463	0.603445		0.477799	0.115943	0.390735	0.709806	0.944382	0.926223	0.899055	0.848064	0.995951
X3.Hydroxybutyrate	0.556698	0.201471	0.519476	0.784013	0.903097	0.675105	0.427528	0.076607	0.995953	0.211965	0.963589	0.26352	0.268845	0.132928	0.071987	0.056382	0.000812	0.049724	0.028543	0.28672	0.404455	0.198672	0.022966	0.00853	0.282166	0.684442	0.494814	0.658419	0.078	0.09794	0.545524	0.364229	0.325658	0.874983	0.203352	0.24673	0.252142	0.101892	0.782775	0.477799		0.09794	8.63e-12	5.63e-05	0.155141	0.028481	0.062117	0.654732	0.075879
Acetate	0.91114	0.793794	0.652892	0.218833	0.011924	0.737534	0.231985	0.451957	0.588033	0.230955	0.947425	0.065175	0.602202	0.392831	0.622691	0.567828	0.420046	0.690599	0.295092	0.02429	0.083443	0.357405	0.464166	0.040103	0.2193	0.255427	0.461306	0.943387	0.502968	0.289814	0.800635	0.847107	0.432752	0.575614	0.414113	0.605767	0.935315	0.308059	0.624197	0.115943	0.09794		0.037187	0.023778	0.971676	0.598646	0.863042	0.283888	0.984823
Acetoacetate	0.44271	0.292206	0.887042	0.973699	0.835194	0.534556	0.361491	0.097384	0.682571	0.046332	0.929265	0.228158	0.183319	0.224462	0.136706	0.076299	0.000239	0.038896	0.044287	0.740353	0.566094	0.499698	0.053962	0.039277	0.409168	0.961567	0.318076	0.813447	0.167987	0.008596	0.32055	0.099619	0.271637	0.708824	0.018514	0.013436	0.041274	0.009157	0.983793	0.390735	8.63e-12	0.037187		1.85e-05	0.230955	0.131588	0.07254	0.62553	0.125748
Acetone	0.225851	0.002218	0.275723	0.877029	0.772318	0.923219	0.291008	0.913151	0.649217	0.174685	0.219827	0.250271	0.957525	0.176843	0.102045	0.098969	0.033431	0.189244	0.573045	0.568696	0.122054	0.921204	0.129275	0.010808	0.467095	0.343987	0.563594	0.116353	0.011822	0.157494	0.34792	0.623723	0.178048	0.534403	0.034401	0.078	0.091435	0.167987	0.685009	0.709806	5.63e-05	0.023778	1.85e-05		0.36698	0.120195	0.26771	0.737534	0.507018
C0	0.045406	0.455062	0.375306	0.600423	0.478706	0.338706	0.30682	0.01942	0.192246	0.961567	0.772318	0.2333	0.50954	0.831915	0.833151	0.55574	0.254329	0.795822	0.047373	0.07584	0.508611	0.927249	0.144233	0.325936	0.015548	0.242455	0.71652	0.52448	0.995953	0.501332	0.565276	0.789878	0.473873	0.111848	0.539628	0.695706	0.907117	0.488338	0.727635	0.944382	0.155141	0.971676	0.230955	0.36698		0.022359	3.85e-07	0.516154	5.42e-05
C2.0	0.387999	0.651054	0.70325	0.678834	0.662114	0.07894	0.491571	0.174685	0.138648	0.747149	0.27804	0.450957	0.20715	0.326092	0.188471	0.179719	0.475518	0.3444	0.476204	0.535298	0.958525	0.861047	0.601977	0.986836	0.828073	0.638241	0.408227	0.393719	0.021341	0.931281	0.706998	0.803606	0.484259	0.337867	0.764548	0.869032	0.589796	0.901088	0.569181	0.926223	0.028481	0.598646	0.131588	0.120195	0.022359		0.092495	0.623723	0.247208
C3.0	0.130208	0.211965	0.20241	0.155141	0.875028	0.1959	0.311792	0.002558	0.086269	0.546426	0.543022	0.90104	0.372519	0.34908	0.228217	0.089257	0.148988	0.239185	0.031282	0.021894	0.282004	0.797715	0.027749	0.093805	0.040468	0.05829	0.885038	0.845119	0.201471	0.815419	0.321823	0.382328	0.34062	0.10436	0.791836	0.833212	0.96561	0.801641	0.783753	0.899055	0.062117	0.863042	0.07254	0.26771	3.85e-07	0.092495		0.731784	1.41e-05
C5.DC	0.287434	0.327004	0.458178	0.741376	0.611131	0.314296	0.360126	0.91919	0.48351	0.913151	0.203352	0.10876	0.049203	0.059673	0.324896	0.339242	0.020362	0.302711	0.136046	0.183646	0.436489	0.303125	0.475243	0.679506	0.912048	0.048553	0.172151	0.065316	0.113843	0.206196	0.014477	0.104787	0.062082	0.854018	0.117623	0.126132	0.018812	0.212937	0.187183	0.848064	0.654732	0.283888	0.62553	0.737534	0.516154	0.623723	0.731784		0.482653
C5.OH	0.19908	0.739423	0.593284	0.934298	0.546376	0.562682	0.496386	0.01528	0.606615	0.950448	0.94338	0.28565	0.656535	0.189084	0.122615	0.093169	0.034499	0.014336	0.004343	0.016591	0.446766	0.19219	0.000153	0.009058	0.056213	0.311107	0.918173	0.925224	0.238171	0.105622	0.013812	0.079849	0.03466	0.012031	0.075879	0.134681	0.38439	0.105622	0.51641	0.995951	0.075879	0.984823	0.125748	0.507018	5.42e-05	0.247208	1.41e-05	0.482653
C4.0.iso	0.3093	0.430542	0.152813	0.50954	0.897072	0.318076	0.921204	0.311792	0.137214	0.656575	0.772318	0.103153	0.10075	0.4457	0.31537	0.400093	0.048877	0.243441	0.351881	0.01514	0.337272	0.686315	0.85797	0.21059	0.202364	0.171313	0.12748	0.612923	0.352001	0.23823	0.197226	0.745223	0.165468	0.068958	0.843132	0.951464	0.48351	0.216856	0.872873	0.770319	0.142279	0.271125	0.37951	0.37113	0.003135	0.605767	0.001325	0.758736	0.034254
C4.0	0.097384	0.236137	0.350658	0.747149	0.935315	0.288622	0.855068	0.568792	0.405302	0.647383	0.582757	0.053468	0.042133	0.916016	0.916139	0.825251	0.291008	0.57926	0.34188	0.040376	0.568696	0.863042	0.595757	0.63795	0.399681	0.23823	0.343987	0.172993	0.236137	0.008138	0.01126	0.109547	0.007242	0.037372	0.073877	0.216856	0.051193	0.00749	0.567444	0.610147	0.467594	0.603983	0.589796	0.823316	0.00062	0.00477	0.006324	0.100183	0.011458
C5.M.DC	0.722232	0.630965	0.72987	0.967632	0.235094	0.925234	0.346646	0.320611	0.554979	0.851085	0.603983	0.998988	0.905107	0.204855	0.007499	0.023559	0.412637	0.055967	0.079335	0.771291	0.481797	0.448863	0.073464	0.188694	0.085648	0.745223	0.663964	0.056085	0.003666	0.412637	0.273357	0.415592	0.339961	0.737441	0.27227	0.249968	0.062905	0.418558	0.244524	0.274448	0.173837	0.269984	0.438125	0.230955	0.997976	0.350658	0.426026	0.040991	0.311731
C5.1	0.671001	0.898956	0.896945	0.766209	0.722857	0.19168	0.065986	0.032017	0.21187	0.608897	0.765237	0.650029	0.675659	0.170573	0.028997	0.049086	0.021165	0.00477	0.002107	0.117055	0.205029	0.030762	2.84e-05	0.09085	0.005534	0.779845	0.520624	0.702901	0.086872	0.432993	0.164113	0.442908	0.322171	0.43624	0.140308	0.298849	0.880886	0.442141	0.054278	0.087683	0.045425	0.783753	0.078785	0.440609	0.002197	0.388118	0.000251	0.281519	9.89e-08
C4.0.2M	0.02487	0.533662	0.85505	0.88803	0.542972	0.685341	0.756772	0.007516	0.615572	0.071842	0.376645	0.105001	0.82824	0.475036	0.38492	0.266963	0.921195	0.790385	0.152269	0.042051	0.555691	0.642765	0.066645	0.816227	0.005111	0.250451	0.980776	0.358704	0.399428	0.106212	0.122054	0.496386	0.229298	0.202651	0.219271	0.164246	0.227825	0.105622	0.797938	0.989373	0.556649	0.114108	0.931273	0.740384	0.000117	0.420733	0.000117	0.637288	0.000166
C5.0	0.02487	0.533662	0.85505	0.88803	0.542972	0.685341	0.756772	0.007516	0.615572	0.071842	0.376645	0.105001	0.82824	0.475036	0.38492	0.266963	0.921195	0.790385	0.152269	0.042051	0.555691	0.642765	0.066645	0.816227	0.005111	0.250451	0.980776	0.358704	0.399428	0.106212	0.122054	0.496386	0.229298	0.202651	0.219271	0.164246	0.227825	0.105622	0.797938	0.989373	0.556649	0.114108	0.931273	0.740384	0.000117	0.420733	0.000117	0.637288	0.000166
C6.0	0.441065	0.612835	0.201826	0.168705	0.784938	0.115943	0.340559	0.543772	0.05602	0.280833	0.651892	0.062598	0.019931	0.819982	0.386636	0.219842	0.048817	0.251435	0.506449	0.594917	0.143177	0.492273	0.851954	0.735813	0.462261	0.72885	0.521038	0.622734	0.075612	0.173305	0.426604	0.153094	0.49303	0.099822	0.541223	0.301777	0.040796	0.156208	0.776864	0.109213	0.009096	0.592353	0.016039	0.542072	0.364109	0.000185	0.521872	0.704126	0.745132
C8.1	0.985836	0.09794	0.011519	0.076607	0.453508	0.194982	0.448863	0.069495	0.118262	0.493191	0.176388	0.492165	0.623723	0.86379	0.467428	0.201826	0.758736	0.64679	0.187187	0.010958	0.480196	0.907117	0.051546	0.299641	0.478214	0.969654	0.132978	0.51119	0.129522	0.782061	0.530295	0.671384	0.242927	0.225169	0.925234	0.867034	0.979767	0.77816	0.038386	0.364796	0.593329	0.37951	0.560141	0.166341	0.018514	0.295817	0.000488	0.494814	0.147426
C8.0	0.26765	0.654692	0.203295	0.069244	0.447264	0.005547	0.633648	0.696611	0.047562	0.944389	0.074967	0.274554	0.029855	0.688073	0.913612	0.355192	0.34194	0.691979	0.976218	0.215206	0.921175	0.560092	0.758563	0.585021	0.677992	0.961563	0.402329	0.990893	0.054442	0.362798	0.93429	0.303064	0.99241	0.663808	0.428976	0.300006	0.063866	0.337333	0.619637	0.321065	0.04901	0.230896	0.056415	0.375247	0.799654	0.006227	0.676931	0.609296	0.816361
C10.1	0.62553	0.825293	0.093565	0.197745	0.877029	0.008288	0.226866	0.803606	0.153586	0.539628	0.128839	0.276059	0.093565	0.505455	0.495465	0.865005	0.82134	0.655095	0.508611	0.345194	0.884008	0.019266	0.231175	0.552062	0.449901	0.901088	0.64372	0.620114	0.340021	0.37951	0.815397	0.589796	0.524428	0.4132	0.365603	0.349317	0.314296	0.35605	0.231394	0.881003	0.269984	0.29461	0.212937	0.925234	0.745223	0.046958	0.891052	0.470755	0.82824
C10.0	0.219827	0.943387	0.221823	0.066549	0.319342	0.003666	0.726048	0.647383	0.041559	0.933298	0.116987	0.285415	0.028905	0.417686	0.787845	0.542922	0.636419	0.969515	0.72885	0.321762	0.816361	0.385158	0.450901	0.807376	0.557117	0.833212	0.51119	0.935315	0.084763	0.336084	0.749047	0.28037	0.826261	0.562585	0.447321	0.303125	0.055007	0.310544	0.436031	0.45262	0.095734	0.216856	0.109547	0.611131	0.551551	0.019886	0.499698	0.485117	0.893045
C12.0.OH.a	0.382209	0.773237	0.31167	0.040656	0.36686	0.00016	0.072466	0.808477	0.045964	0.750946	0.249307	0.319611	0.176705	0.477375	0.38203	0.863474	0.350537	0.22558	0.064364	0.338464	0.603358	0.012369	0.113051	0.420269	0.363569	0.887014	0.726938	0.499592	0.36137	0.900059	0.472572	0.976727	0.438717	0.698354	0.800611	0.922192	0.992916	0.875998	0.035287	0.238518	0.611042	0.681562	0.954483	0.583542	0.825251	0.104697	0.889019	0.793745	0.674992
C12.0.OH.b	0.839161	0.427528	0.268845	0.029768	0.739454	0.000475	0.17983	0.288622	0.006951	0.651054	0.534556	0.103153	0.126805	0.376509	0.566046	0.880001	0.751005	0.525081	0.081248	0.503682	0.988868	0.046958	0.151013	0.338939	0.141453	0.387999	0.60934	0.923219	0.099619	0.963589	0.681599	0.875028	0.675068	0.768347	0.99393	0.987859	0.82134	0.931281	0.081899	0.426662	0.380917	0.647383	0.575756	0.855068	0.373911	0.006029	0.445781	0.36698	0.424469
C12.1	0.567057	0.71272	0.292206	0.135792	0.987859	0.001854	0.389425	0.835194	0.061336	0.424527	0.47234	0.281297	0.169644	0.24637	0.30602	0.980774	0.751005	0.334487	0.155425	0.312295	0.741314	0.024328	0.082098	0.850958	0.738214	0.688189	0.933298	0.739454	0.257632	0.458178	0.963584	0.572269	0.721246	0.877985	0.403843	0.2632	0.256528	0.433567	0.033074	0.572174	0.450409	0.320611	0.436603	0.847107	0.754868	0.073877	0.588033	0.385158	0.593284
C14.2	0.596872	0.813447	0.315553	0.201471	0.851085	0.005971	0.228904	0.455062	0.358764	0.475518	0.412637	0.302268	0.159077	0.322246	0.326822	0.998988	0.96561	0.439062	0.231867	0.211364	0.893032	0.020044	0.171039	0.427125	0.417293	0.752936	0.963589	0.531187	0.462874	0.433567	0.699439	0.737534	0.439594	0.515998	0.325719	0.289814	0.521142	0.414113	0.053803	0.455728	0.163084	0.805572	0.21489	0.684442	0.754868	0.069924	0.77816	0.697589	0.460467
C12.0	0.26771	0.925234	0.21489	0.097384	0.541324	0.002671	0.53287	0.575756	0.082787	0.521142	0.354697	0.585207	0.137214	0.208199	0.582617	0.75771	0.877029	0.765447	0.372399	0.306081	0.828219	0.137214	0.302821	0.6674	0.60358	0.845119	0.595099	0.927249	0.115722	0.369743	0.769374	0.301899	0.958531	0.983807	0.27804	0.124794	0.071223	0.349317	0.100877	0.866003	0.138648	0.23823	0.168814	0.636419	0.489953	0.03641	0.567057	0.321883	0.90409
C14.0.OH	0.965606	0.902081	0.457342	0.19219	0.475463	0.044015	0.073615	0.030853	0.116622	0.227315	0.403057	0.170413	0.73271	0.72792	0.792715	0.78003	0.979764	0.908197	0.068852	0.420617	0.902057	0.028041	0.193727	0.176588	0.162748	0.939342	0.706998	0.982799	0.111633	0.467539	0.402271	0.314235	0.41993	0.310613	0.781059	0.782035	0.801617	0.4707	0.556589	0.199897	0.374549	0.700382	0.776184	0.546376	0.342602	0.001085	0.511963	0.353287	0.382209
C14.1	0.514496	0.563594	0.447321	0.113222	0.96561	0.011223	0.651054	0.987859	0.047591	0.126805	0.598646	0.345738	0.251054	0.662451	0.851031	0.354577	0.27227	0.527605	0.563497	0.168705	0.55832	0.26771	0.445498	0.267288	0.960513	0.494814	0.44271	0.629151	0.064909	0.383741	0.978753	0.512842	0.813425	0.913119	0.283888	0.122808	0.074327	0.36836	0.228315	0.912124	0.019886	0.572269	0.031556	0.149748	0.823316	0.004963	0.570529	0.614717	0.79279
C14.0	0.593329	0.883034	0.380917	0.204297	0.651054	0.031556	0.883034	0.943387	0.165523	0.197745	0.893058	0.592262	0.244586	0.266804	0.7947	0.990892	0.240337	0.575747	0.413258	0.820309	0.58706	0.593329	0.415301	0.489575	0.672901	0.851085	0.44271	0.596872	0.118262	0.073429	0.304908	0.115722	0.417016	0.623594	0.052212	0.008913	0.009407	0.070355	0.460747	0.595008	0.009923	0.973699	0.007284	0.087284	0.89908	0.013211	0.995953	0.36698	0.587106
C16.1	0.742306	0.458903	0.293947	0.235035	0.583589	0.075194	0.762581	0.948428	0.073392	0.059955	0.697554	0.410504	0.637288	0.97466	0.558223	0.399672	0.197226	0.418578	0.698425	0.452176	0.522237	0.815397	0.50224	0.192248	0.949382	0.537038	0.643679	0.227825	0.064672	0.215813	0.696576	0.55923	0.710754	0.940834	0.160618	0.060915	0.054265	0.209009	0.282338	0.848046	0.009566	0.8451	0.013424	0.066928	0.642765	0.015988	0.928248	0.749047	0.5853
C16.0.OH	0.02762	0.987835	0.911972	0.723615	0.16425	0.442566	0.878793	0.34037	0.580252	0.451054	0.31647	0.201262	0.851792	0.875557	0.769849	0.89433	0.481032	0.985743	0.794328	0.650327	0.448231	0.900894	0.148462	0.260136	0.239377	0.424351	0.948333	0.130793	0.392054	0.118463	0.420924	0.659634	0.46114	0.746575	0.128051	0.174653	0.197758	0.112785	0.665269	0.197876	0.087134	0.762154	0.140002	0.181113	0.009165	0.005035	0.041983	0.735112	0.03174
C18.2	0.725061	0.573964	0.46675	0.629109	0.353962	0.308618	0.016453	0.155869	0.454229	0.219271	0.631831	0.17654	0.874013	0.881802	0.96256	0.895528	0.405973	0.54111	0.144336	0.568648	0.312234	0.339961	0.275648	0.009667	0.000163	0.343264	0.908111	0.625487	0.375945	0.951458	0.21088	0.172938	0.404455	0.226377	0.745193	0.989881	0.54979	0.959541	0.69767	0.112927	0.1195	0.222265	0.185467	0.093255	0.020829	0.025537	0.113485	0.857042	0.20513
C16.0	0.200011	0.991905	0.388652	0.126419	0.964595	0.067136	0.997976	0.434267	0.166697	0.667631	0.141496	0.507218	0.307378	0.662875	0.774643	0.53736	0.34194	0.814069	0.281065	0.348467	0.575614	0.926232	0.292441	0.975191	0.47776	0.690968	0.706998	0.798672	0.502097	0.042979	0.165006	0.232443	0.106463	0.147271	0.116306	0.094061	0.09272	0.038755	0.99848	0.864988	0.077262	0.23975	0.07565	0.154698	0.039162	0.009825	0.035369	0.585346	0.022236
C18.1	0.433509	0.175906	0.725061	0.228846	0.960552	0.096788	0.049829	0.17891	0.01528	0.102421	0.224781	0.087972	0.633648	0.370171	0.231491	0.199897	0.124413	0.121956	0.363021	0.618183	0.28844	0.660226	0.965585	0.012861	0.053891	0.676931	0.640024	0.167108	0.012488	0.533662	0.755776	0.749047	0.748052	0.881474	0.375247	0.447264	0.386518	0.53873	0.916057	0.298058	0.004077	0.148936	0.004811	0.000896	0.232443	0.003001	0.847088	0.889033	0.829209
C18.0	0.222825	0.947425	0.82134	0.086775	0.925234	0.208107	0.577503	0.187746	0.087795	0.403843	0.795754	0.118714	0.295817	0.82993	0.908089	0.743237	0.265449	0.987804	0.177993	0.398645	0.811431	0.929265	0.144233	0.436964	0.066227	0.621917	0.865038	0.727958	0.785967	0.04791	0.496386	0.135792	0.552358	0.187131	0.044494	0.051193	0.206196	0.04953	0.478159	0.72026	0.427528	0.15051	0.253234	0.35605	0.007216	0.350658	0.064505	0.855068	0.016587
Total.cholesterol	0.616514	0.169644	0.825293	0.752936	0.995953	0.782061	0.409694	0.249968	0.373911	0.27688	0.159873	0.330634	0.572269	0.104112	0.048302	0.030162	0.196821	0.028213	0.422167	0.272723	0.258065	0.772318	0.093621	0.047226	0.26378	0.651054	0.427528	0.222825	0.02724	0.209067	0.241335	0.022359	0.663925	0.745132	0.087284	0.095188	0.658419	0.226866	0.704793	0.599444	0.151275	0.507893	0.301899	0.085263	0.516154	0.023059	0.995953	0.354697	0.336023
VLDL.cholesterol	0.593329	0.155141	0.275723	0.123467	0.873029	0.121496	0.082787	0.486726	0.641892	0.453508	0.148988	0.766377	0.056085	0.555962	0.243341	0.200888	0.593329	0.489567	0.625444	0.122711	0.078391	0.883034	0.545325	0.409285	0.037614	0.701361	0.726048	0.62734	0.283888	0.005474	0.088009	0.002476	0.280894	0.349806	0.009662	0.003202	0.010838	0.005264	0.488605	0.019463	0.582757	0.865038	0.321883	0.506249	0.651054	0.652892	0.330877	0.638241	0.708893
LDL.cholesterol	0.91114	0.110762	0.527828	0.26771	0.529506	0.48351	0.171313	0.194067	0.450409	0.164707	0.057548	0.264644	0.152813	0.0722	0.033121	0.012964	0.620114	0.237076	0.763522	0.497146	0.036231	0.891052	0.71255	0.176002	0.068316	0.459741	0.675105	0.230955	0.045713	0.612923	0.644594	0.097384	0.72697	0.564314	0.470755	0.330877	0.752936	0.629151	0.834993	0.227257	0.42303	0.418558	0.48351	0.154362	0.396597	0.136502	0.785967	0.222825	0.892041
HDL.cholesterol	0.293406	0.957525	0.28037	0.467594	0.570529	0.695706	0.684442	0.658419	0.758736	0.935315	0.539628	0.577314	0.663964	0.176843	0.509382	0.41993	0.140818	0.138567	0.283767	0.238112	0.248226	0.99393	0.162815	0.321458	0.535788	0.24673	0.424527	0.891052	0.579252	0.115722	0.120796	0.105962	0.158231	0.337211	0.048553	0.110153	0.343987	0.128158	0.068069	0.782008	0.164707	0.766489	0.602202	0.973699	0.774264	0.007352	0.756801	0.512842	0.20757
Tot..ester..chol.	0.560141	0.181568	0.801641	0.737534	0.941368	0.78011	0.48351	0.260964	0.380917	0.23823	0.155141	0.259054	0.718422	0.09054	0.049768	0.031169	0.159077	0.025395	0.362738	0.292684	0.340559	0.731784	0.073688	0.059373	0.322612	0.54984	0.39804	0.243519	0.031328	0.254329	0.271637	0.02955	0.699439	0.831169	0.09794	0.108342	0.708927	0.275723	0.599971	0.655574	0.120195	0.486726	0.237182	0.091964	0.478706	0.014857	0.98179	0.375306	0.323737
Total.free.cholesterol	0.791836	0.152813	0.987859	0.478706	0.963589	0.507893	0.203352	0.252142	0.614717	0.345315	0.081812	0.38209	0.373911	0.156696	0.060847	0.034722	0.429034	0.090927	0.669449	0.217232	0.11251	0.941368	0.207339	0.066713	0.095619	0.843132	0.652892	0.2632	0.025461	0.111987	0.227825	0.010838	0.648259	0.604741	0.053945	0.03641	0.353348	0.120195	0.957473	0.289096	0.321883	0.588033	0.596872	0.107744	0.663964	0.096282	0.889046	0.516154	0.502097
Apolipopr.B	0.98179	0.122808	0.323159	0.093029	0.955505	0.162277	0.334777	0.224839	0.669526	0.159077	0.163084	0.645387	0.091435	0.249612	0.098366	0.066892	0.913151	0.3696	0.905084	0.357964	0.082218	0.588033	0.664695	0.435442	0.10585	0.660265	0.82134	0.235094	0.162277	0.236137	0.647342	0.061725	0.848083	0.732646	0.160671	0.118262	0.432053	0.240337	0.491031	0.25696	0.833212	0.905107	0.957525	0.260964	0.72987	0.548132	0.766489	0.37951	0.911129
Apolipopr.A1	0.301899	0.855068	0.172993	0.602202	0.752936	0.782061	0.697589	0.521142	0.815419	0.756801	0.813447	0.757652	0.927249	0.081699	0.335248	0.441065	0.087284	0.039306	0.345859	0.422167	0.665738	0.745223	0.147219	0.154771	0.782802	0.676969	0.329583	0.809507	0.502968	0.089341	0.062475	0.059418	0.157835	0.217668	0.040709	0.056812	0.104203	0.096282	0.060416	0.669449	0.118262	0.318076	0.447321	0.751005	0.551551	0.013897	0.507893	0.385158	0.192644
Total.lipopr.prtcs	0.196821	0.917177	0.28037	0.853076	0.99393	0.89908	0.473928	0.234055	0.621917	0.64555	0.909128	0.463436	0.739454	0.013357	0.103198	0.149643	0.055364	0.012964	0.369624	0.587941	0.773237	0.885038	0.114545	0.077728	0.409902	0.690066	0.318076	0.749076	0.249968	0.161473	0.084225	0.057179	0.277399	0.515998	0.056812	0.078469	0.145979	0.172151	0.146209	0.583542	0.076146	0.105373	0.220823	0.470755	0.299457	0.008441	0.44271	0.110762	0.27624
VLDL.prtcs	0.632781	0.39804	0.403843	0.227884	0.691944	0.252142	0.031556	0.282712	0.877029	0.506249	0.152042	0.555642	0.089341	0.463609	0.258005	0.230837	0.60934	0.511723	0.369624	0.233418	0.040656	0.686315	0.673053	0.491193	0.027459	0.801641	0.91114	0.889046	0.392285	0.002318	0.068395	0.00799	0.232959	0.45723	0.007844	0.002146	0.001525	0.002098	0.471788	0.004176	0.678834	0.47234	0.353348	0.612923	0.691944	0.897072	0.70325	0.438125	0.908111
LDL.prtcs	0.91919	0.145233	0.239282	0.100183	0.691944	0.167162	0.360126	0.158284	0.690066	0.193155	0.126132	0.741252	0.062117	0.266804	0.094787	0.062441	0.807539	0.299641	0.91615	0.441831	0.061657	0.684442	0.843037	0.535045	0.096717	0.72987	0.656575	0.311792	0.198672	0.357405	0.718389	0.117623	0.774237	0.546277	0.305585	0.254329	0.581003	0.361491	0.742992	0.327526	0.917177	0.855068	0.89908	0.240337	0.686315	0.560141	0.770374	0.265449	0.800635
HDL.prtcs	0.224839	0.955505	0.242455	0.695706	0.991906	0.791836	0.64372	0.287434	0.743299	0.813447	0.87903	0.609163	0.887042	0.013874	0.13248	0.171622	0.049859	0.027179	0.347192	0.575661	1	0.985836	0.147219	0.161901	0.680366	0.51119	0.220823	0.973699	0.421537	0.169644	0.110716	0.118904	0.289157	0.628118	0.074327	0.104787	0.149748	0.17983	0.089964	0.701291	0.071223	0.154362	0.253234	0.621917	0.310544	0.004404	0.332174	0.099057	0.353287
Phosphoglycerides	0.436603	0.845119	0.325719	0.616514	0.791836	0.985836	0.129522	0.186854	0.98179	0.793794	0.614717	0.822242	0.671384	0.102085	0.272089	0.38433	0.144491	0.030938	0.855032	0.313547	0.535298	0.522809	0.195616	0.072721	0.124025	0.931281	0.399486	0.845119	0.29461	0.00756	0.009024	0.004187	0.070102	0.161714	0.003339	0.003069	0.008993	0.008288	0.118428	0.156994	0.27688	0.112603	0.766489	0.499698	0.574011	0.052555	0.521142	0.216856	0.269923
Chylomcr...prtcs	0.19134	0.87903	0.959546	0.714619	0.847107	0.813447	0.286249	0.501332	0.949444	0.785967	0.791836	0.249187	0.825293	0.678271	0.744169	0.871998	0.096282	0.757661	0.338585	0.335962	0.833171	0.915164	0.606437	0.302086	0.820157	0.531187	0.329583	0.485117	0.705141	0.000772	0.044165	0.08377	0.054089	0.478542	0.003135	0.005971	0.001204	0.000697	0.71143	0.051469	0.095734	0.82134	0.042714	0.148232	0.705141	0.178103	0.427528	0.863042	0.611086
XL.VLDL.prtcs	0.167162	0.632781	0.233019	0.504607	0.72987	0.82925	0.088823	0.697589	0.638241	0.737534	0.991906	0.335841	0.448863	0.786559	0.969643	0.93429	0.514496	0.98069	0.392883	0.207034	0.269293	0.85706	0.893996	0.902009	0.132878	0.749076	0.891052	0.285067	0.630965	0.011321	0.118535	0.15051	0.230383	0.608313	0.01736	0.009491	0.000573	0.009491	0.403256	0.024013	0.797715	0.603983	0.403843	0.690066	0.470755	0.298241	0.320611	0.640065	0.603939
L.VLDL.prtcs	0.180698	0.345315	0.25874	0.364229	0.851085	0.710823	0.069068	0.623723	0.596872	0.791836	0.766489	0.679618	0.426026	0.509575	0.630838	0.494706	0.699474	0.746027	0.549741	0.10209	0.220706	0.943387	0.705913	0.703951	0.119441	0.64555	0.751005	0.582757	0.995953	0.01822	0.106508	0.12748	0.213366	0.546277	0.022883	0.014491	0.001752	0.015872	0.37192	0.048011	0.710823	0.634599	0.77816	0.99393	0.563594	0.629151	0.27688	0.662114	0.588868
M.VLDL.prtcs	0.638241	0.141547	0.319342	0.113843	0.935315	0.275723	0.082298	0.577503	0.859053	0.156707	0.118904	0.978745	0.164707	0.337796	0.13742	0.098689	0.737534	0.348415	0.711703	0.170785	0.078157	0.85706	0.387703	0.521613	0.094801	0.408227	0.91114	0.489953	0.196821	0.032482	0.203295	0.031556	0.469909	0.911107	0.031556	0.021508	0.041274	0.031786	0.26654	0.045348	0.91919	0.758736	0.784013	0.519476	0.977744	0.782061	0.439651	0.527828	0.900072
S.VLDL.prtcs	0.91114	0.504607	0.406763	0.190437	0.789878	0.178965	0.026836	0.122808	0.983813	0.298241	0.230955	0.723054	0.073429	0.253977	0.215697	0.250934	0.720326	0.496081	0.337272	0.425911	0.038999	0.560141	0.852986	0.553777	0.009787	0.797715	0.933298	0.805572	0.593329	0.011125	0.124746	0.033913	0.280894	0.618183	0.027037	0.009662	0.002194	0.010012	0.420957	0.004549	0.616514	0.24673	0.360126	0.747149	0.991906	0.897072	0.843132	0.321883	0.663925
XS.VLDL.prtcs	0.682571	0.537935	0.656575	0.34798	0.967632	0.233019	0.033431	0.139369	0.727958	0.967632	0.128839	0.747992	0.146727	0.949351	0.783935	0.792765	0.568792	0.896602	0.338585	0.480996	0.033025	0.54984	0.536836	0.303928	0.002275	0.400936	0.983813	0.760672	0.548132	0.022883	0.17891	0.008596	0.451901	0.188471	0.062117	0.012131	0.028692	0.021341	0.58229	0.018042	0.444244	0.737534	0.244586	0.39804	0.951464	0.691944	0.733699	0.961567	0.74423
IDL.prtcs	0.787922	0.100183	0.27688	0.068643	0.275723	0.117623	0.96561	0.726048	0.815419	0.271125	0.316813	0.437135	0.408227	0.676403	0.29624	0.231867	0.861047	0.33057	0.26196	0.218717	0.638158	0.268845	0.229121	0.174724	0.393905	0.616514	0.851085	0.117623	0.165523	0.36836	0.663925	0.028062	0.966617	0.702201	0.162277	0.109547	0.859053	0.378106	0.502437	0.9081	0.50954	0.621917	0.82134	0.151275	0.941368	0.531187	0.441179	1	0.61917
L.LDL.prtcs	0.745223	0.063302	0.2632	0.107744	0.933298	0.215872	0.098497	0.19134	0.620114	0.27804	0.05019	0.753784	0.050523	0.223957	0.095059	0.078391	0.969654	0.270598	0.727894	0.145876	0.048493	0.71652	0.772182	0.34689	0.052617	0.575756	0.776211	0.149748	0.07894	0.088823	0.316752	0.020522	0.789853	0.873982	0.132978	0.096832	0.301899	0.090908	0.528154	0.111587	0.953484	0.859053	0.815419	0.234055	0.634599	0.438125	0.589796	0.629151	0.879015
M.LDL.prtcs	0.943387	0.225851	0.178103	0.056448	0.498068	0.213912	0.568792	0.420046	0.827271	0.15051	0.130897	0.591378	0.12748	0.382141	0.188471	0.102953	0.973699	0.695321	0.981785	0.804542	0.089777	0.671384	0.85199	0.504236	0.127377	0.695706	0.889046	0.435083	0.445781	0.917177	0.980776	0.333474	0.55493	0.380739	0.907117	0.634599	0.851085	0.915164	0.447526	0.533611	0.688189	0.714619	0.536244	0.282712	0.760672	0.764548	0.726048	0.108342	0.482653
S.LDL.prtcs	0.963589	0.26771	0.212937	0.114467	0.607553	0.319342	0.784013	0.245657	0.754868	0.244586	0.1959	0.288379	0.27688	0.592641	0.301717	0.149643	0.837177	0.623031	0.912124	0.677826	0.155425	0.665816	0.882963	0.733478	0.351458	0.87903	0.885038	0.3093	0.219827	0.743299	0.774237	0.27227	0.437307	0.324896	0.375306	0.37951	0.839161	0.762609	0.718089	0.84707	0.837177	0.71652	0.867034	0.435083	0.623723	0.37951	0.726048	0.548132	0.743268
XL.HDL.prtcs	0.847107	0.486726	0.382328	0.745223	0.143751	0.470755	0.136502	0.324437	0.498068	0.352001	0.266578	0.936292	0.128158	0.078589	0.07765	0.188527	0.764548	0.50346	0.296906	0.259174	0.033263	0.762609	0.992913	0.731561	0.217812	0.971676	0.927249	0.745223	0.636419	0.338706	0.752906	0.360126	0.546376	0.330047	0.159077	0.26771	0.98179	0.365603	0.827061	0.413258	0.710823	0.05829	0.720326	0.529506	0.616514	0.282712	0.89908	0.180698	0.516102
L.HDL.prtcs	0.481906	0.554979	0.333474	0.660265	0.163894	0.629151	0.145233	0.486726	0.417074	0.399486	0.140092	0.982793	0.287434	0.663378	0.382149	0.540375	0.815419	0.944141	0.200421	0.207991	0.021894	0.688189	0.492922	0.979749	0.15157	0.462874	0.975721	0.784013	0.691944	0.130897	0.353962	0.189537	0.265389	0.276698	0.048877	0.113843	0.48351	0.145233	0.51979	0.536143	0.539628	0.2632	0.733699	0.421537	0.770374	0.122151	0.851085	0.561866	0.285006
M.HDL.prtcs	0.393719	0.861047	0.143751	0.467594	0.887042	0.675105	0.62734	0.543022	0.77816	0.77816	0.749076	0.872967	0.91919	0.130843	0.400034	0.503682	0.099057	0.044498	0.45107	0.464333	0.725983	0.630965	0.1402	0.170512	0.802409	0.722232	0.3093	0.647383	0.551551	0.075232	0.053389	0.056448	0.138597	0.201768	0.037187	0.059418	0.091964	0.081328	0.042583	0.60657	0.130208	0.269984	0.456619	0.727958	0.589796	0.01736	0.502968	0.362858	0.198151
S.HDL.prtcs	0.399486	0.558418	0.539628	0.85706	0.378106	0.787922	0.097384	0.155141	0.514496	0.462874	0.365603	0.73645	0.152813	0.000907	0.009293	0.014585	0.171313	0.040136	0.863009	0.812417	0.081732	0.893058	0.204009	0.149763	0.157805	0.264323	0.333474	0.861047	0.171313	0.200535	0.110411	0.06251	0.511137	0.892015	0.13793	0.10132	0.078469	0.208107	0.181448	0.07584	0.343987	0.028481	0.477111	0.611131	0.260964	0.066549	0.658419	0.011419	0.496386
Creatinine	0.053595	0.504607	0.329583	0.340021	0.53287	0.008213	0.875028	0.128158	0.050523	0.851085	0.201471	0.463436	0.028062	0.224968	0.384979	0.83813	0.172993	0.180375	0.493895	0.394319	0.977739	0.159077	0.517554	0.066092	0.182816	0.596872	0.766489	0.99393	0.737534	0.009836	0.006718	0.033191	0.009065	0.052118	0.004538	0.004448	0.002007	0.008288	0.138861	0.368241	0.891052	0.584514	0.461306	0.64372	0.905107	0.316813	0.851085	0.032954	0.331464
Albumin	0.426026	0.253234	0.458178	0.47234	0.055724	0.204297	0.06822	0.282712	0.521142	0.158284	0.693824	0.776104	0.603983	0.005725	0.02608	0.016371	0.001962	0.002503	0.000646	0.072687	0.120748	0.176388	0.004981	0.244169	0.095073	0.06018	0.354697	0.334777	0.498068	0.983813	0.321823	0.634599	0.183263	0.328755	0.955505	0.531187	0.385158	0.957525	0.107886	0.165006	0.126805	0.87903	0.058664	0.498068	0.568792	0.414113	0.13793	0.387999	0.004835
[truncated: 54 more columns]
